# Supplementary material
Source: PubMed Central journal article supplement (PMC7054217)
Supplement: 41586_2020_1969_MOESM4_ESM.pdf [file 41586_2020_1969_MOESM4_ESM.pdf]

# Supplementary Information

The **ICGC/TCGA Pan-Cancer Analysis of Whole Genomes Consortium**

**Writing Committee**

**Writing Committee Leads** Peter J. Campbell<sup>1,2,745\*</sup>, Gad Getz<sup>3,4,5,6,745\*</sup>, Jan O. Korbel<sup>7,8,745\*</sup>, Joshua M. Stuart<sup>9,745\*</sup>, Jennifer L. Jennings<sup>10,11</sup> & Lincoln D. Stein<sup>12,13,745\*</sup>

**Sample collection** Marc D. Perry<sup>14,15</sup>, Hardeep K. Nahal-Bose<sup>15</sup> & B. F. Francis Ouellette<sup>16,17</sup>

**Histopathology harmonization** Constance H. Li<sup>12,18</sup>, Esther Rheinbay<sup>3,6,19</sup>, G. Petur Nielsen<sup>19</sup>, Dennis C. Sgroi<sup>19</sup>, Chin-Lee Wu<sup>19</sup>, William C. Faquin<sup>19</sup>, Vikram Deshpande<sup>19</sup>, Paul C. Boutros<sup>12,18,20,21</sup>, Alexander J. Lazar<sup>22</sup>, Katherine A. Hoadley<sup>23,24</sup>, Lincoln D. Stein<sup>12,13</sup> & David N. Louis<sup>19</sup>

**Uniform processing, somatic and germline variant calling** L. Jonathan Dursi<sup>12,25</sup>, Christina K. Yung<sup>15</sup>, Matthew H. Bailey<sup>26,27</sup>, Gordon Saksena<sup>3</sup>, Keiran M. Raine<sup>1</sup>, Ivo Buchhalter<sup>28,29,30</sup>, Kortine Kleinheinz<sup>28,30</sup>, Matthias Schlesner<sup>28,31</sup>, Junjun Zhang<sup>15</sup>, Wenyi Wang<sup>32</sup>, David A. Wheeler<sup>33,34</sup>, Li Ding<sup>26,27,35</sup> & Jared T. Simpson<sup>12,36</sup>

**Methods section 'Core alignment and variant calling by cloud computing'** Christina K. Yung<sup>15</sup>, Brian D. O'Connor<sup>15,37</sup>, Sergei Yakneen<sup>8</sup>, Junjun Zhang<sup>15</sup>, Kyle Ellrott<sup>38</sup>, Kortine Kleinheinz<sup>28,30</sup>, Naoki Miyoshi<sup>39</sup>, Keiran M. Raine<sup>1</sup>, Adam P. Butler<sup>1</sup>, Romina Royo<sup>40</sup>, Gordon Saksena<sup>3</sup>, Matthias Schlesner<sup>28,31</sup>, Solomon I. Shorser<sup>12</sup> & Miguel Vazquez<sup>40,41</sup>

**Methods section 'Integration, phasing and validation of germline variant call sets'** Tobias Rausch<sup>8</sup>, Grace Tiao<sup>3</sup>, Sebastian M. Waszak<sup>8</sup>, Bernardo Rodriguez-Martin<sup>42,43,44</sup>, Suyash Shringarpure<sup>45</sup>, Dai-Ying Wu<sup>46</sup>, Sergei Yakneen<sup>8</sup>, German M. Demidov<sup>47,48,49</sup>, Olivier Delaneau<sup>50,51,52</sup>, Shuto Hayashi<sup>39</sup>, Seiya Imoto<sup>39</sup>, Nina Habermann<sup>8</sup>, Ayellet Y. Segre<sup>3,53</sup>, Erik Garrison<sup>1</sup>, Andy Cafferkey<sup>7</sup>, Eva G. Alvarez<sup>42,43,44</sup>, José María Heredia-Genestar<sup>54</sup>, Francesc Muiyas<sup>47,48,49</sup>, Oliver Drechsel<sup>47,49</sup>, Alicia L. Bruzos<sup>42,43,44</sup>, Javier Temes<sup>42,43</sup>, Jorge Zamora<sup>1,42,43,44</sup>, L. Jonathan Dursi<sup>12,25</sup>, Adrian Baez-Ortega<sup>55</sup>, Hyung-Lae Kim<sup>56</sup>, Matthew H. Bailey<sup>26,27</sup>, R. Jay Mashl<sup>27,57</sup>, Kai Ye<sup>58,59</sup>, Ivo Buchhalter<sup>28,29,30</sup>, Anthony DiBiase<sup>60</sup>, Kuan-lin Huang<sup>27,61</sup>, Ivica Letunic<sup>62</sup>, Michael D. McLellan<sup>26,27,35</sup>, Steven J. Newhouse<sup>7</sup>, Matthias Schlesner<sup>28,31</sup>, Tal Shmaya<sup>46</sup>, Sushant Kumar<sup>63,64</sup>, David C. Wedge<sup>1,65,66</sup>, Mark H. Wright<sup>45</sup>, Venkata D. Yellapantula<sup>67,68</sup>, Mark Gerstein<sup>63,64,69</sup>, Ekta Khurana<sup>70,71,72,73</sup>, Tomas Marques-Bonet<sup>74,75,76,77</sup>, Arcadi Navarro<sup>74,75,76</sup>, Carlos D. Bustamante<sup>45,78</sup>, Jared T. Simpson<sup>12,36</sup>, Li Ding<sup>26,27,35</sup>, Reiner Siebert<sup>79,80</sup>, Hidewaki Nakagawa<sup>81</sup>, Douglas F. Easton<sup>82,83</sup>, Stephan Ossowski<sup>47,48,49</sup>, Jose M. C. Tubio<sup>42,43,44</sup>, Gad Getz<sup>3,4,5,6</sup>, Francisco M. De La Vega<sup>45,46,78</sup>, Xavier Estivill<sup>47,84</sup> & Jan O. Korbel<sup>7,8</sup>

**Methods section 'Validation, benchmarking and merging of somatic variant calls'** L. Jonathan Dursi<sup>12,25</sup>, David A. Wheeler<sup>33,34</sup>, Christina K. Yung<sup>15</sup>, Li Ding<sup>26,27,35</sup> & Jared T. Simpson<sup>12,36</sup>

**Data and code availability** Junjun Zhang<sup>15</sup>, Christina K. Yung<sup>15</sup>, Sergei Yakneen<sup>8</sup>, Denis Yuen<sup>12</sup>, George L. Mihaiescu<sup>15</sup>, Larsson Omberg<sup>85</sup> & Vincent Ferretti<sup>15,86</sup>

**Pan-cancer burden of somatic mutations** Junjun Zhang<sup>15</sup> & Peter J. Campbell<sup>12</sup>

**Panorama of driver mutations in human cancer** Radhakrishnan Sabarinathan<sup>87,88,89</sup>, Oriol Pich<sup>87,89</sup> & Abel Gonzalez-Perez<sup>87,89</sup>

**PCAWG tumours with no apparent driver mutations** Esther Rheinbay<sup>3,6,19</sup>, Amaro Taylor-Weiner<sup>90</sup>, Radhakrishnan Sabarinathan<sup>87,88,89</sup>, Peter J. Campbell<sup>12</sup> & Gad Getz<sup>3,4,5,6</sup>

**Patterns and oncogenicity of kataegis and chromoplexy** Matthew W. Fittall<sup>91</sup>, Jonas Demeulemeester<sup>91,92</sup>, Maxime Tarabichi<sup>1,91</sup>, Nicola D. Roberts<sup>1</sup>, Peter J. Campbell<sup>1,2</sup>, Jan O. Korbel<sup>7,8</sup> & Peter Van Looy<sup>91,92</sup>

**Patterns and oncogenicity of chromothripsis** Maxime Tarabichi<sup>1,91</sup>, Jonas Demeulemeester<sup>91,92</sup>, Matthew W. Fittall<sup>91</sup>, Isidro Cortés-Ciriano<sup>93,94,95</sup>, Lara Urban<sup>7,8</sup>, Peter Park<sup>94,95</sup>, Peter J. Campbell<sup>1,2</sup>, Jan O. Korbel<sup>7,8</sup> & Peter Van Looy<sup>91,92</sup>

**Timing-clustered mutational processes during tumour evolution** Jonas Demeulemeester<sup>91,92</sup>, Maxime Tarabichi<sup>1,91</sup>, Matthew W. Fittall<sup>91</sup>, Jan O. Korbel<sup>7,8</sup>, Peter J. Campbell<sup>1,2</sup> & Peter Van Looy<sup>91,92</sup>

**Germline genetic determinants of the somatic mutation landscape** Sebastian M. Waszak<sup>8</sup>, Bin Zhu<sup>96</sup>, Bernardo Rodriguez-Martin<sup>42,43,44</sup>, Esa Pitkänen<sup>8</sup>, Tobias Rausch<sup>8</sup>, Yilong Li<sup>1</sup>, Natalie Saini<sup>97</sup>, Leszek J. Klimczak<sup>98</sup>, Joachim Weischenfeldt<sup>8,99,100</sup>, Nikos Sidiropoulos<sup>100</sup>, Ludmil B. Alexandrov<sup>1,101</sup>, Francesc Muiyas<sup>47,48,49</sup>, Raquel Rabionet<sup>47,49,102</sup>, Georgia Escaramis<sup>47,103,104</sup>, Adrian Baez-Ortega<sup>55</sup>, Mattia Bosio<sup>40,47,49</sup>, Aliaksei Z. Holik<sup>47</sup>, Hana Susak<sup>47,49</sup>, Eva G. Alvarez<sup>42,43,44</sup>, Alicia L. Bruzos<sup>42,43,44</sup>, Javier Temes<sup>42,43</sup>, Aparna Prasad<sup>49</sup>, Nina Habermann<sup>8</sup>, Serap Erkek<sup>8</sup>, Lara Urban<sup>7,8</sup>, Claudia Calabrese<sup>7,8</sup>, Benjamin Raeder<sup>8</sup>, Eoghan Harrington<sup>105</sup>, Simon Mayes<sup>106</sup>, Daniel Turner<sup>106</sup>, Sissel Juul<sup>105</sup>, Steven A. Roberts<sup>107</sup>, Lei Song<sup>96</sup>, Roelof Koster<sup>108</sup>, Lisa Mirabello<sup>96</sup>, Xing Hua<sup>96</sup>, Tomas J. Tanskanen<sup>109</sup>, Marta Tojo<sup>14</sup>, David C. Wedge<sup>1,65,66</sup>, Jorge Zamora<sup>1,42,43,44</sup>, Jieming Chen<sup>64,110</sup>, Lauri A. Aaltonen<sup>111</sup>, Gunnar Rättsch<sup>112,113,114,115,116,117</sup>, Roland F. Schwarz<sup>7,118,119,120</sup>, Atul J. Butte<sup>121</sup>, Alvis Brazma<sup>7</sup>, Peter J. Campbell<sup>1,2</sup>, Stephen J. Chanock<sup>96</sup>, Nilanjan Chatterjee<sup>122,123</sup>

Oliver Stegle<sup>7,8,124</sup>, Olivier Harismendy<sup>125</sup>, G. Steven Bova<sup>126</sup>, Dmitry A. Gordenin<sup>97</sup>, Jose M. C. Tubio<sup>42,43,44</sup>, Douglas F. Easton<sup>82,83</sup>, Xavier Estivill<sup>47,84</sup> & Jan O. Korbel<sup>7,8</sup>

**Replicative immortality** David Haan<sup>9</sup>, Lina Sieverling<sup>127,128</sup>, Lars Feuerbach<sup>127</sup>, Lincoln D. Stein<sup>12,13</sup> & Joshua M. Stuart<sup>9</sup>

**Ethical considerations of genomic cloud computing** Don Chalmers<sup>129</sup>, Yann Joly<sup>130</sup>, Bartha Knoppers<sup>130</sup>, Fruzsina Molnár-Gábor<sup>131</sup>, Jan O. Korbel<sup>7,8</sup>, Mark Phillips<sup>130</sup>, Adrian Thorogood<sup>130</sup> & David Townsend<sup>130</sup>

**Online resources for data access, visualization and analysis** Mary Goldman<sup>132</sup>, Junjun Zhang<sup>15</sup>, Nuno A. Fonseca<sup>7,133</sup>, Qian Xiang<sup>15</sup>, Brian Craft<sup>132</sup>, Elena Piñero-Yáñez<sup>134</sup>, Alfonso Muñoz<sup>7</sup>, Robert Petryszak<sup>7</sup>, Anja Füllgrabe<sup>7</sup>, Fatima Al-Shahrour<sup>134</sup>, Maria Keays<sup>7</sup>, David Haussler<sup>132,135</sup>, John Weinstein<sup>136,137</sup>, Wolfgang Huber<sup>8</sup>, Alfonso Valencia<sup>40,76</sup>, Irene Papatheodorou<sup>7</sup>, Jingchun Zhu<sup>132</sup>, Brian D. O'Connor<sup>15,37</sup>, Lincoln D. Stein<sup>12,13</sup>, Alvis Brazma<sup>7</sup>, Vincent Ferretti<sup>15,86</sup> & Miguel Vazquez<sup>40,41</sup>

**Pilot-63 Validation Process** L. Jonathan Dursi<sup>12,25</sup>, Christina K. Yung<sup>15</sup>, Matthew H. Bailey<sup>26,27</sup>, Gordon Saksena<sup>3</sup>, Keiran M. Raine<sup>1</sup>, Ivo Buchhalter<sup>28,29,30</sup>, Kortine Kleinheinz<sup>28,30</sup>, Matthias Schlesner<sup>28,31</sup>, Yu Fan<sup>32</sup>, David Torrents<sup>40,76</sup>, Matthias Bieg<sup>138,139</sup>, Paul C. Boutros<sup>12,18,20,21</sup>, Ken Chen<sup>140</sup>, Zechen Chong<sup>141</sup>, Kristian Cibulskis<sup>3</sup>, Oliver Drechsel<sup>47,49</sup>, Roland Eils<sup>28,30,142,143</sup>, Robert S. Fulton<sup>26,27,35</sup>, Joseph L. Gelpi<sup>40,144</sup>, Mark Gerstein<sup>63,64,69</sup>, Santiago Gonzalez<sup>7,8</sup>, Gad Getz<sup>3,4,5,6</sup>, Ivo G. Gut<sup>49,74</sup>, Faraz Hach<sup>145,146</sup>, Michael Heinold<sup>28,30</sup>, Taobo Hu<sup>147</sup>, Vincent Huang<sup>12</sup>, Barbara Hutter<sup>139,148,149</sup>, Hyung-Lae Kim<sup>56</sup>, Natalie Jäger<sup>28</sup>, Jongsun Jung<sup>150</sup>, Sushant Kumar<sup>63,64</sup>, Yogesh Kumar<sup>147</sup>, Christopher Lalansingh<sup>12</sup>, Ignaty Leshchiner<sup>3</sup>, Ivica Letunic<sup>62</sup>, Dimitri Livitz<sup>3</sup>, Eric Z. Ma<sup>147</sup>, Yosef E. Maruvka<sup>3,19,151</sup>, R. Jay Mashl<sup>27,57</sup>, Michael D. McLellan<sup>26,27,35</sup>, Ana Milovanovic<sup>40</sup>, Morten Muhlig Nielsen<sup>152</sup>, Brian D. O'Connor<sup>15,37</sup>, Stephan Ossowski<sup>47,48,49</sup>, Nagarajan Paramasivam<sup>28,139</sup>, Jakob Skou Pedersen<sup>152,153</sup>, Marc D. Perry<sup>14,15</sup>, Montserrat Puiggrós<sup>40</sup>, Romina Royo<sup>40</sup>, Esther Rheinbay<sup>3,6,19</sup>, S. Cenk Sahinalp<sup>146,154,155</sup>, Iman Sarraf<sup>146,155</sup>, Chip Stewart<sup>3</sup>, Miranda D. Stobbe<sup>49,74</sup>, Grace Tiao<sup>3</sup>, Jeremiah A. Wala<sup>3,6,156</sup>, Jiayin Wang<sup>27,58,157</sup>, Wenyi Wang<sup>32</sup>, Sebastian M. Waszak<sup>8</sup>, Joachim Weischenfeldt<sup>8,99,100</sup>, Michael Wend<sup>27,158,159</sup>, Johannes Werner<sup>28,160</sup>, Zhenggang Wu<sup>147</sup>, Hong Xue<sup>147</sup>, Sergei Yakneen<sup>8</sup>, Takafumi N. Yamaguchi<sup>12</sup>, Kai Ye<sup>58,59</sup>, Venkata Yellapantula<sup>67,68</sup>, Junjun Zhang<sup>15</sup>, David A. Wheeler<sup>33,34</sup>, Li Ding<sup>26,27,35</sup> & Jared T. Simpson<sup>12,36</sup>

**Pilot-63 Processing of Validation Data** Christina K. Yung<sup>15</sup>, Brian D. O'Connor<sup>15,37</sup>, Sergei Yakneen<sup>8</sup>, Junjun Zhang<sup>15</sup>, Kyle Ellrott<sup>38</sup>, Kortine Kleinheinz<sup>28,30</sup>, Naoki Miyoshi<sup>39</sup>, Keiran M. Raine<sup>1</sup>, Romina Royo<sup>40</sup>, Gordon Saksena<sup>3</sup>, Matthias Schlesner<sup>28,31</sup>, Solomon I. Shorser<sup>12</sup>, Miguel Vazquez<sup>40,41</sup>, Joachim Weischenfeldt<sup>8,99,100</sup>, Denis Yuen<sup>12</sup>, Adam P. Butler<sup>1</sup>, Brandi N. Davis-Dusenbery<sup>161</sup>, Roland Eils<sup>28,30,142,143</sup>, Vincent Ferretti<sup>15,86</sup>, Robert L. Grossman<sup>162</sup>, Olivier Harismendy<sup>125</sup>, Youngwook Kim<sup>163,164</sup>, Hidewaki Nakagawa<sup>81</sup>, Steven J. Newhouse<sup>7</sup>, David Torrents<sup>40,76</sup> & Lincoln D. Stein<sup>12,13</sup>

**Whole-genome Sequencing Somatic Variant calling** Junjun Zhang<sup>15</sup>, Christina K. Yung<sup>15</sup> & Solomon I. Shorser<sup>12</sup>

**Whole Genome alignment** Keiran M. Raine<sup>1</sup>, Junjun Zhang<sup>15</sup> & Brian D. O'Connor<sup>15,37</sup>

**DKFZ Pipeline** Kortine Kleinheinz<sup>28,30</sup>, Tobias Rausch<sup>8</sup>, Jan O. Korbel<sup>7,8</sup>, Ivo Buchhalter<sup>28,29,30</sup>, Michael C. Heinold<sup>28,30</sup>, Barbara Hutter<sup>139,148,149</sup>, Natalie Jäger<sup>28</sup>, Nagarajan Paramasivam<sup>28,139</sup> & Matthias Schlesner<sup>28,31</sup>

**EMBL Pipeline** Joachim Weischenfeldt<sup>8,99,100</sup> & Tobias Rausch<sup>8</sup>

**Sanger Pipeline** Keiran M. Raine<sup>1</sup>, Jonathan Hinton<sup>1</sup>, David R. Jones<sup>1</sup>, Andrew Menzies<sup>1</sup> & Lucy Stebbings<sup>1</sup>

**Broad Pipeline** Gordon Saksena<sup>3</sup>, Dimitri Livitz<sup>3</sup>, Esther Rheinbay<sup>3,6,19</sup>, Julian M. Hess<sup>3,151</sup>, Ignaty Leshchiner<sup>3</sup>, Chip Stewart<sup>3</sup>, Grace Tiao<sup>3</sup>, Jeremiah A. Wala<sup>3,6,156</sup>, Amaro Taylor-Weiner<sup>90</sup>, Mara Rosenberg<sup>3,19</sup>, Andrew J. Dunford<sup>3</sup>, Manasvi Gupta<sup>3</sup>, Marcin Imielinski<sup>165,166</sup>, Matthew Meyerson<sup>3,6,156</sup>, Rameen Beroukhi<sup>3,6,167</sup> & Gad Getz<sup>3,4,5,6</sup>

**MUSE Pipeline** Yu Fan<sup>32</sup> & Wenyi Wang<sup>32</sup>

**Consensus Somatic SNV/indel Annotation** Andrew Menzies<sup>1</sup>, Matthias Schlesner<sup>28,31</sup>, Jüri Reimand<sup>12,18</sup>, Priyanka Dhingra<sup>7,17,73</sup> & Ekta Khurana<sup>70,71,72,73</sup>

**Somatic SNV and Indel Merging** L. Jonathan Dursi<sup>12,25</sup>, Christina K. Yung<sup>15</sup>, Matthew H. Bailey<sup>26,27</sup>, Gordon Saksena<sup>3</sup>, Keiran M. Raine<sup>1</sup>, Ivo Buchhalter<sup>28,29,30</sup>, Kortine Kleinheinz<sup>28,30</sup>, Matthias Schlesner<sup>28,31</sup>, Yu Fan<sup>32</sup>, David Torrents<sup>40,76</sup>, Matthias Bieg<sup>138,139</sup>, Paul C. Boutros<sup>12,18,20,21</sup>, Ken Chen<sup>140</sup>, Zechen Chong<sup>141</sup>, Kristian Cibulskis<sup>3</sup>, Oliver Drechsel<sup>47,49</sup>, Roland Eils<sup>28,30,142,143</sup>, Robert S. Fulton<sup>26,27,35</sup>, Joseph L. Gelpi<sup>40,144</sup>, Mark Gerstein<sup>63,64,69</sup>, Santiago Gonzalez<sup>7,8</sup>, Gad Getz<sup>3,4,5,6</sup>, Ivo G. Gut<sup>49,74</sup>, Faraz Hach<sup>145,146</sup>, Michael Heinold<sup>28,30</sup>, Taobo Hu<sup>147</sup>, Vincent Huang<sup>12</sup>, Barbara Hutter<sup>139,148,149</sup>, Hyung-Lae Kim<sup>56</sup>, Natalie Jäger<sup>28</sup>, Jongsun Jung<sup>150</sup>, Sushant Kumar<sup>63,64</sup>, Yogesh Kumar<sup>147</sup>, Christopher Lalansingh<sup>12</sup>, Ignaty Leshchiner<sup>3</sup>, Ivica Letunic<sup>62</sup>, Dimitri Livitz<sup>3</sup>, Eric Z. Ma<sup>147</sup>, Yosef E. Maruvka<sup>3,19,151</sup>, R. Jay Mashl<sup>27,57</sup>, Michael D. McLellan<sup>26,27,35</sup>, &

Ana Milovanovic<sup>40</sup>, Morten Mühlig Nielsen<sup>152</sup>, Brian D. O'Connor<sup>15,37</sup>, Stephan Ossowski<sup>47,48,49</sup>, Nagarajan Paramasivam<sup>28,139</sup>, Jakob Skou Pedersen<sup>152,153</sup>, Marc D. Perry<sup>14,15</sup>, Montserrat Puiggròs<sup>40</sup>, Romina Royo<sup>40</sup>, Esther Rheinbay<sup>3,6,19</sup>, S. Cenik Sahinalp<sup>146,154,155</sup>, Iman Sarrafi<sup>146,155</sup>, Chip Stewart<sup>3</sup>, Miranda D. Stobbe<sup>49,74</sup>, Grace Tiao<sup>3</sup>, Jeremiah A. Wala<sup>3,6,156</sup>, Jiayin Wang<sup>27,58,157</sup>, Wenyi Wang<sup>32</sup>, Sebastian M. Waszak<sup>8</sup>, Joachim Weischenfeldt<sup>8,99,100</sup>, Michael Wendt<sup>27,158,159</sup>, Johannes Werner<sup>28,160</sup>, Zhenggang Wu<sup>147</sup>, Hong Xue<sup>147</sup>, Sergei Yakneen<sup>8</sup>, Takafumi N. Yamaguchi<sup>12</sup>, Kai Ye<sup>58,59</sup>, Venkata Yellapantula<sup>67,68</sup>, Junjun Zhang<sup>15</sup>, David A. Wheeler<sup>33,34</sup>, Li Ding<sup>26,27,35</sup> & Jared T. Simpson<sup>12,36</sup>

**Somatic SV Merging** Joachim Weischenfeldt<sup>8,99,100</sup>, Francesco Favero<sup>168</sup> & Yilong Li<sup>1</sup>

**Somatic CNA Merging** Stefan Dentre<sup>1,65,91</sup>, Jeff Wintersinger<sup>169,170,171</sup> & Ignaty Leshchiner<sup>3</sup>

**Oxidative Artefact Filtration** Dimitri Livitz<sup>3</sup>, Ignaty Leshchiner<sup>3</sup>, Chip Stewart<sup>3</sup>, Esther Rheinbay<sup>3,6,19</sup>, Gordon Saksena<sup>3</sup> & Gad Getz<sup>3,4,5,6</sup>

**Strand Bias Filtration** Matthias Bieg<sup>138,139</sup>, Ivo Buchhalter<sup>28,29,30</sup>, Johannes Werner<sup>28,160</sup> & Matthias Schlesner<sup>28,31</sup>

**miniBAM Generation** Jeremiah A. Wala<sup>3,6,156</sup>, Gordon Saksena<sup>3</sup>, Rameen Beroukhi<sup>3,6,167</sup> & Gad Getz<sup>3,4,5,6</sup>

**Germline Variant Identification from WGS** Tobias Rausch<sup>8</sup>, Grace Tiao<sup>3</sup>, Sebastian M. Waszak<sup>8</sup>, Bernardo Rodriguez-Martin<sup>42,43,44</sup>, Suyash Shringarpure<sup>45</sup>, Dai-Ying Wu<sup>46</sup>, Sergei Yakneen<sup>8</sup>, German M. Demidov<sup>47,48,49</sup>, Olivier Delaneau<sup>50,51,52</sup>, Shuto Hayashi<sup>59</sup>, Seiya Imoto<sup>39</sup>, Nina Habermann<sup>8</sup>, Ayellet V. Segre<sup>8,53</sup>, Erik Garrison<sup>1</sup>, Andy Cafferkey<sup>7</sup>, Eva G. Alvarez<sup>42,43,44</sup>, Alicia L. Bruzos<sup>42,43,44</sup>, Jorge Zamora<sup>42,43,44</sup>, José María Heredia-Genestar<sup>54</sup>, Francesco Muyas<sup>47,48,49</sup>, Oliver Drechsel<sup>47,49</sup>, L. Jonathan Dursi<sup>12,25</sup>, Adrian Baez-Ortega<sup>55</sup>, Hyung-Lae Kim<sup>56</sup>, Matthew H. Bailey<sup>26,27</sup>, R. Jay Mashl<sup>27,57</sup>, Kai Ye<sup>58,59</sup>, Ivo Buchhalter<sup>28,29,30</sup>, Vasilisa Rudneva<sup>8</sup>, Ji Wan Park<sup>172</sup>, Eun Pyo Hong<sup>172</sup>, Seong Gu Heo<sup>172</sup>, Anthony DiBiase<sup>60</sup>, Kuan-lin Huang<sup>27,61</sup>, Ivica Letunic<sup>62</sup>, Michael D. McLellan<sup>26,27,35</sup>, Steven J. Newhouse<sup>7</sup>, Matthias Schlesner<sup>28,31</sup>, Tal Shmaya<sup>46</sup>, Sushant Kumar<sup>63,64</sup>, David C. Wedge<sup>1,65,66</sup>, Mark H. Wright<sup>45</sup>, Venkata D. Yellapantula<sup>67,68</sup>, Mark Gerstein<sup>63,64,69</sup>, Ekta Khurana<sup>70,71,72,73</sup>, Tomas Marques-Bonet<sup>74,75,76,77</sup>, Arcadi Navarro<sup>74,75,76</sup>, Carlos D. Bustamante<sup>48,78</sup>, Jared T. Simpson<sup>12,36</sup>, Li Ding<sup>26,27,35</sup>, Reiner Siebert<sup>79,80</sup>, Hidewaki Nakagawa<sup>81</sup>, Douglas F. Easton<sup>82,83</sup>, Stephan Ossowski<sup>47,48,49</sup>, Jose M. C. Tubio<sup>42,43,44</sup>, Gad Getz<sup>3,4,5,6</sup>, Francisco M. De La Vega<sup>45,46,78</sup> & Xavier Estivill<sup>47,84</sup> & Jan O. Korbel<sup>78</sup>

**RNA-seq Analysis** Nuno A. Fonseca<sup>7133</sup>, André Kahles<sup>112,113,114,115,116</sup>, Kjong-Van Lehmann<sup>112,114,115,173,174</sup>, Lara Urban<sup>78</sup>, Cameron M. Soulette<sup>37</sup>, Yuichi Shiraiishi<sup>39</sup>, Fenglin Liu<sup>175,176</sup>, Yao He<sup>175</sup>, Deniz Demircioğlu<sup>177,178</sup>, Natalie R. Davidson<sup>112,114,115,171,173</sup>, Claudia Calabrese<sup>78</sup>, Junjun Zhang<sup>15</sup>, Marc D. Perry<sup>14,15</sup>, Qian Xiang<sup>15</sup>, Liliana Greger<sup>7</sup>, Siliang Li<sup>179,180</sup>, Dongbing Liu<sup>179,180</sup>, Stefan G. Stark<sup>115,173,181,182</sup>, Fan Zhang<sup>175</sup>, Samikumar B. Amin<sup>183,184,185</sup>, Peter Bailey<sup>86</sup>, Aurélien Chateigner<sup>15</sup>, Isidro Cortés-Ciriano<sup>93,94,95</sup>, Brian Craft<sup>32</sup>, Serap Erkek<sup>8</sup>, Milana Frenkel-Morgenstern<sup>187</sup>, Mary Goldman<sup>132</sup>, Katherine A. Hoadley<sup>23,24</sup>, Yong Hou<sup>179,180</sup>, Matthew R. Huska<sup>118</sup>, Ekta Khurana<sup>70,71,72,73</sup>, Helena Kilpinen<sup>188</sup>, Jan O. Korbel<sup>78</sup>, Fabien C. Lamaze<sup>12</sup>, Chang Li<sup>179,180</sup>, Xiaobo Li<sup>179,180</sup>, Xinyue Li<sup>79</sup>, Xingmin Liu<sup>179,180</sup>, Maximilian G. Marin<sup>37</sup>, Julia Markowski<sup>118</sup>, Tannistha Nandi<sup>189</sup>, Morten Mühlig Nielsen<sup>152</sup>, Akinyemi I. Ojesina<sup>190,191,192</sup>, Qiang Pan-Hammarström<sup>179,193</sup>, Peter J. Park<sup>94,95</sup>, Chandra Sekhar Pedamallu<sup>3,6,167</sup>, Jakob Skou Pedersen<sup>152,153</sup>, Reiner Siebert<sup>79,80</sup>, Hong Su<sup>79,180</sup>, Patrick Tan<sup>189,194,195,196</sup>, Bin Tean Teh<sup>194,195,196,197,198</sup>, Jian Wang<sup>179</sup>, Sebastian M. Waszak<sup>8</sup>, Heng Xiong<sup>179,180</sup>, Sergei Yakneen<sup>8</sup>, Chen Ye<sup>179,180</sup>, Christina Yung<sup>15</sup>, Xiuqing Zhang<sup>79</sup>, Liangtao Zheng<sup>175</sup>, Jingchun Zhu<sup>32</sup>, Shida Zhu<sup>79,180</sup>, Philip Awadalla<sup>12,13</sup>, Chad J. Creighton<sup>189</sup>, Matthew Meyerson<sup>3,6,156</sup>, B. F. Francis Ouellette<sup>16,17</sup>, Kui Wu<sup>179,180</sup>, Huanming Yang<sup>179</sup>, Jonathan Gökke<sup>172,200</sup>, Roland F. Schwarz<sup>2118,119,120</sup>, Oliver Stegle<sup>78,124</sup>, Zemin Zhang<sup>175,201</sup>, Alvis Brazma<sup>7</sup>, Gunnar Rättsch<sup>112,113,114,115,116,117</sup> & Angela N. Brooks<sup>3,37,156</sup>

**Clustering of Tumour Genomes Based on Telomere Maintenance-Related Features** David Haan<sup>9</sup>, Lincoln D. Stein<sup>12,13</sup> & Joshua M. Stuart<sup>9</sup>

**Clustered Mutational Processes in PCAWG** Jonas Demeulemeester<sup>91,92</sup>, Maxime Tarabichi<sup>1,91</sup>, Matthew W Fittall<sup>91</sup>, Peter J. Campbell<sup>12</sup>, Jan O. Korbel<sup>78</sup> & Peter Van Looy<sup>91,92</sup>

**Tumours Without Detected Driver Mutations** Esther Rheinbay<sup>3,6,19</sup>, Amaro Taylor-Weiner<sup>90</sup>, Radhakrishnan Sabarinathan<sup>87,88,89</sup>, Peter J. Campbell<sup>12</sup> & Gad Getz<sup>3,4,5,6</sup>

**Panorama of Driver Mutations in Human Cancer** Radhakrishnan Sabarinathan<sup>87,88,89</sup>, Oriol Pich<sup>87,89</sup>, Iñigo Martincorena<sup>1</sup>, Carlota Rubio-Perez<sup>87,89,202</sup>, Malene Juul<sup>152</sup>, Jeremiah A. Wala<sup>3,6,156</sup>, Steven Schumacher<sup>3,203</sup>, Ofer Shapira<sup>3,156</sup>, Nikos Sidiropoulos<sup>100</sup>, Sebastian M. Waszak<sup>8</sup>, David Tamborero<sup>87,89</sup>, Loris Mularoni<sup>87,89</sup>, Esther Rheinbay<sup>3,6,19</sup>, Henrik Hornshøj<sup>152</sup>, Jordi Deu-Pons<sup>89,204</sup>, Ferran Muiños<sup>87,89</sup>, Johanna Bertl<sup>152,205</sup>, Qianyun Guo<sup>153</sup>, Chad J. Creighton<sup>189</sup>, Joachim Weischenfeldt<sup>8,99,100</sup>, Jan O. Korbel<sup>78</sup>, Gad Getz<sup>3,4,5,6</sup>, Peter J. Campbell<sup>12</sup>, Jakob Skou Pedersen<sup>152,153</sup>, Rameen Beroukhi<sup>3,6,167</sup> & Abel Gonzalez-Perez<sup>87,89,206</sup>

**Pilot-63 Benchmarking and Validation Exercise, Production Calling and Variant Consensus Development, and Performance on Previously Validated Samples** L. Jonathan Dursi<sup>12,25</sup>, Christina K. Yung<sup>15</sup>, Matthew H. Bailey<sup>26,27</sup>, Gordon Saksena<sup>3</sup>, Keiran M. Raine<sup>1</sup>,

Ivo Buchhalter<sup>28,29,30</sup>, Kortine Kleinheinz<sup>28,30</sup>, Matthias Schlesner<sup>28,31</sup>, Yu Fan<sup>32</sup>, David Torrents<sup>40,76</sup>, Matthias Bieg<sup>138,139</sup>, Paul C. Boutros<sup>12,18,20,21</sup>, Ken Chen<sup>140</sup>, Zechen Cheng<sup>141</sup>, Kristian Cibulskis<sup>3</sup>, Oliver Drechsel<sup>47,49</sup>, Roland Eils<sup>28,30,142,143</sup>, Robert S. Fulton<sup>26,27,35</sup>, Joseph L. Gelpi<sup>40,144</sup>, Mark Gerstein<sup>63,64,69</sup>, Santiago Gonzalez<sup>78</sup>, Gad Getz<sup>3,4,5,6</sup>, Ivo G. Gut<sup>49,74</sup>, Faraz Hach<sup>145,146</sup>, Michael Heindol<sup>28,30</sup>, Taobo Hu<sup>147</sup>, Vincent Huang<sup>12</sup>, Barbara Hutter<sup>139,148,149</sup>, Hyung-Lae Kim<sup>56</sup>, Natalie Jäger<sup>28</sup>, Jongsun Jung<sup>150</sup>, Sushant Kumar<sup>63,64</sup>, Yogesh Kumar<sup>147</sup>, Christopher Lalansing<sup>12</sup>, Ignaty Leshchiner<sup>3</sup>, Ivica Letunic<sup>62</sup>, Dimitri Livitz<sup>3</sup>, Eric Z. Ma<sup>147</sup>, Yosef E. Maruvak<sup>3,19,151</sup>, R. Jay Mashl<sup>27,57</sup>, Michael D. McLellan<sup>26,27,35</sup>, Ana Milovanovic<sup>40</sup>, Morten Mühlig Nielsen<sup>152</sup>, Brian D. O'Connor<sup>15,37</sup>, Stephan Ossowski<sup>47,48,49</sup>, Nagarajan Paramasivam<sup>28,139</sup>, Jakob Skou Pedersen<sup>152,153</sup>, Marc D. Perry<sup>14,15</sup>, Montserrat Puiggròs<sup>40</sup>, Romina Royo<sup>40</sup>, Esther Rheinbay<sup>3,6,19</sup>, S. Cenik Sahinalp<sup>146,154,155</sup>, Iman Sarrafi<sup>146,155</sup>, Chip Stewart<sup>3</sup>, Miranda D. Stobbe<sup>49,74</sup>, Grace Tiao<sup>3</sup>, Jeremiah A. Wala<sup>3,6,156</sup>, Jiayin Wang<sup>27,58,157</sup>, Wenyi Wang<sup>32</sup>, Sebastian M. Waszak<sup>8</sup>, Joachim Weischenfeldt<sup>8,99,100</sup>, Michael Wendt<sup>27,158,159</sup>, Johannes Werner<sup>28,160</sup>, Zhenggang Wu<sup>147</sup>, Hong Xue<sup>147</sup>, Sergei Yakneen<sup>8</sup>, Takafumi N. Yamaguchi<sup>12</sup>, Kai Ye<sup>58,59</sup>, Venkata Yellapantula<sup>67,68</sup>, Junjun Zhang<sup>15</sup>, David A. Wheeler<sup>33,34</sup>, Li Ding<sup>26,27,35</sup> & Jared T. Simpson<sup>12,36</sup>

**Production Somatic Variant Calling on the PCAWG Compute Cloud** Christina K. Yung<sup>15</sup>, Brian D. O'Connor<sup>15,37</sup>, Sergei Yakneen<sup>8</sup>, Junjun Zhang<sup>15</sup>, Kyle Ellrott<sup>38</sup>, Kortine Kleinheinz<sup>28,30</sup>, Naoki Miyoshi<sup>39</sup>, Keiran M. Raine<sup>1</sup>, Romina Royo<sup>40</sup>, Gordon Saksena<sup>3</sup>, Matthias Schlesner<sup>28,31</sup>, Solomon I. Shorser<sup>12</sup>, Miguel Vazquez<sup>40,41</sup>, Joachim Weischenfeldt<sup>8,99,100</sup>, Denis Yuen<sup>12</sup>, Adam P. Butler<sup>1</sup>, Brandi N. Davis-Dusenbery<sup>161</sup>, Roland Eils<sup>28,30,142,143</sup>, Vincent Ferretti<sup>15,86</sup>, Robert L. Grossman<sup>162</sup>, Olivier Harismendy<sup>125</sup>, Youngwook Kim<sup>163,164</sup>, Hidewaki Nakagawa<sup>81</sup>, Steven J. Newhouse<sup>7</sup>, David Torrents<sup>40,76</sup> & Lincoln D. Stein<sup>12,13</sup>

**PCAWG data portals** Mary Goldman<sup>132</sup>, Junjun Zhang<sup>15</sup>, Nuno A. Fonseca<sup>7133</sup>, Isidro Cortés-Ciriano<sup>93,94,95</sup>, Qian Xiang<sup>207</sup>, Brian Craft<sup>32</sup>, Elena Piñero-Yañez<sup>134</sup>, Brian D. O'Connor<sup>15,37</sup>, Wojciech Bazant<sup>7</sup>, Elisabet Barrera<sup>7</sup>, Alfonso Muñoz<sup>7</sup>, Robert Petryszak<sup>7</sup>, Anja Füllgrabe<sup>7</sup>, Fatima Al-Shahrour<sup>134</sup>, Maria Keays<sup>7</sup>, David Haussler<sup>132,135</sup>, John Weinstein<sup>136,137</sup>, Wolfgang Huber<sup>8</sup>, Alfonso Valencia<sup>40,76</sup>, Irene Papatheodorou<sup>7</sup>, Jingchun Zhu<sup>132</sup>, Vincent Ferretti<sup>15,86</sup> & Miguel Vazquez<sup>40,41</sup>

**ICGC/TCGA Pan-Cancer Analysis of Whole Genomes Working Groups**

**PCAWG Steering committee** Peter J. Campbell<sup>12</sup>, Gad Getz<sup>3,4,5,6</sup>, Jan O. Korbel<sup>78</sup>, Lincoln D. Stein<sup>12,13</sup> & Joshua M. Stuart<sup>9</sup>

**PCAWG Head of Project Management** Jennifer L. Jennings<sup>1011</sup>

**PCAWG Executive committee** Sultan T. Al-Sedairy<sup>208</sup>, Axel Aretz<sup>209</sup>, Cindy Bell<sup>210</sup>, Miguel Betancourt<sup>211</sup>, Christiane Buchholz<sup>212</sup>, Fabien Calvo<sup>213</sup>, Christine Chomienne<sup>214</sup>, Michael Dunn<sup>215</sup>, Stuart Edmonds<sup>216</sup>, Eric Green<sup>217</sup>, Shailja Gupta<sup>218</sup>, Carolyn M. Hutter<sup>217</sup>, Karine Jegalian<sup>219</sup>, Jennifer L. Jennings<sup>10,11</sup>, Nic Jones<sup>220</sup>, Hyung-Lae Kim<sup>56</sup>, Youyong Lu<sup>221,222,223</sup>, Hitoshi Nakagama<sup>224</sup>, Gerd Nettekoven<sup>225</sup>, Laura Planko<sup>225</sup>, David Scott<sup>220</sup>, Tatsuhiro Shibata<sup>226,227</sup>, Kiyo Shimizu<sup>228</sup>, Lincoln D. Stein<sup>12,13</sup>, Michael R. Stratton<sup>1</sup>, Takashi Yugawa<sup>228</sup>, Giampaolo Tortora<sup>229,230</sup>, K. VijayRaghavan<sup>218</sup>, Huanming Yang<sup>179</sup> & Jean C. Zenklusen<sup>231</sup>

**PCAWG Ethics and Legal Working Group** Yann Joly<sup>130</sup>, Fruzsina Molnár-Gábor<sup>131</sup>, Mark Phillips<sup>130</sup>, Adrian Thorogood<sup>130</sup>, David Townend<sup>232</sup>, Don Chalmers<sup>129</sup> & Bartha M. Knoppers<sup>130</sup>

**PCAWG Technical Working Group** Brice Aminou<sup>15</sup>, Javier Bartolome<sup>40</sup>, Keith A. Boreovich<sup>81,233</sup>, Rich Boyce<sup>7</sup>, Alvis Brazma<sup>7</sup>, Angela N. Brooks<sup>3,37,156</sup>, Alex Buchanan<sup>38</sup>, Ivo Buchhalter<sup>28,29,30</sup>, Adam P. Butler<sup>1</sup>, Niall J. Byrne<sup>15</sup>, Andy Cafferkey<sup>7</sup>, Peter J. Campbell<sup>12</sup>, Zhaohong Chen<sup>234</sup>, Sunghoon Cho<sup>235</sup>, Wan Choi<sup>236</sup>, Peter Clapham<sup>1</sup>, Brandi N. Davis-Dusenbery<sup>161</sup>, Francisco M. De La Vega<sup>45,46,78</sup>, Jonas Demeulemeester<sup>91,92</sup>, Michelle T. Dow<sup>234</sup>, Lewis Jonathan Dursi<sup>12,25</sup>, Juergen Eils<sup>142,143</sup>, Roland Eils<sup>28,30,142,143</sup>, Kyle Ellrott<sup>38</sup>, Claudiu Farcas<sup>234</sup>, Nodirjon Fayzullaev<sup>15</sup>, Vincent Ferretti<sup>15,86</sup>, Paul Flicek<sup>7</sup>, Nuno A. Fonseca<sup>7133</sup>, Josep L. Gelpi<sup>40,144</sup>, Gad Getz<sup>3,4,5,6</sup>, Robert L. Grossman<sup>162</sup>, Olivier Harismendy<sup>125</sup>, Allison P. Heath<sup>237</sup>, Michael C. Heindol<sup>28,30</sup>, Julian M. Hess<sup>3,151</sup>, Oliver Hofmann<sup>238</sup>, Jongwhi H. Hong<sup>239</sup>, Thomas J. Hudson<sup>240,241</sup>, Barbara Hutter<sup>139,148,149</sup>, Carolyn M. Hutter<sup>217</sup>, Daniel Hübschmann<sup>30,120,142,242,243</sup>, Seiya Imoto<sup>39</sup>, Sinisa Ivkovic<sup>244</sup>, Seung-Hyup Jeon<sup>236</sup>, Wei Jiao<sup>12</sup>, Jongsun Jung<sup>150</sup>, Rolf Kabbe<sup>28</sup>, Andre Kahles<sup>112,113,114,115,174</sup>, Jules N. A. Kerssemakers<sup>28</sup>, Hyung-Lae Kim<sup>56</sup>, Hyunghwan Kim<sup>236</sup>, Jihoon Kim<sup>245</sup>, Youngwook Kim<sup>163,164</sup>, Kortine Kleinheinz<sup>28,30</sup>, Jan O. Korbel<sup>78</sup>, Michael Koscher<sup>246</sup>, Antonios Kouros<sup>234</sup>, Milena Kovacevic<sup>244</sup>, Chris Lawerenz<sup>143</sup>, Ignaty Leshchiner<sup>3</sup>, Jia Liu<sup>247</sup>, Dimitri Livitz<sup>3</sup>, George L. Mihaiescu<sup>15</sup>, Sanja Mijalkovic<sup>244</sup>, Ana Mijalkovic Mijalkovic-Lazic<sup>244</sup>, Satoru Miyano<sup>39</sup>, Naoki Miyoshi<sup>39</sup>, Hardeep K. Nahal-Bose<sup>15</sup>, Hidewaki Nakagawa<sup>81</sup>, Mia Nastic<sup>244</sup>, Steven J. Newhouse<sup>7</sup>, Jonathan Nicholson<sup>1</sup>, David Oceana<sup>7</sup>, Kazuhiro Ohi<sup>39</sup>, Lucila Ohno-Machado<sup>234</sup>, Larsson Omberg<sup>85</sup>, B. F. Francis Ouellette<sup>16,17</sup>, Nagarajan Paramasivam<sup>28,139</sup>, Marc D. Perry<sup>14,15</sup>, Todd D. Pih<sup>248</sup>, Manuel Prinz<sup>29</sup>, Montserrat Puiggròs<sup>40</sup>, Petar Radovic<sup>244</sup>, Keiran M. Raine<sup>1</sup>, Esther Rheinbay<sup>3,6,19</sup>, Mara Rosenberg<sup>3,19</sup>, Romina Royo<sup>40</sup>, Gunnar Rättsch<sup>112,113,114,115,116,117</sup>, Gordon Saksena<sup>3</sup>, Matthias Schlesner<sup>28,31</sup>, Solomon I. Shorser<sup>12</sup>, Charles Short<sup>7</sup>, Heidi J. Sofia<sup>217</sup>, Jonathan Spring<sup>162</sup>, Adam J. Struck<sup>38</sup>, Grace Tiao<sup>3</sup>, Nebojsa Tijanic<sup>244</sup>, David Torrents<sup>40,76</sup>, Peter Van Looy<sup>92</sup>, Miguel Vazquez<sup>40,41</sup>, David Vicente<sup>40</sup>, Jeremiah A. Wala<sup>3,6,156</sup>, Zhining Wang<sup>231</sup>, Sebastian M. Waszak<sup>8</sup>, Joachim Weischenfeldt<sup>8,99,100</sup>, Johannes Werner<sup>28,160</sup>, Ashley Williams<sup>234</sup>, Youngchoon Woo<sup>236</sup>, Adam J. Wright<sup>12</sup>, Qian Xiang<sup>207</sup>, Liming Yang<sup>231</sup>, Denis Yuen<sup>12</sup>, Brian D. O'Connor<sup>15,37</sup>, Lincoln D. Stein<sup>12,13</sup>, Sergei Yakneen<sup>8</sup>, Christina K. Yung<sup>15</sup> & Junjun Zhang<sup>15</sup>

**PCAWG Reference Annotations Working Group** Angela N. Brooks<sup>3,37,156</sup>, Ivo Buchhalter<sup>28,29,30</sup>, Peter J. Campbell<sup>12</sup>, Priyanka Dhingra<sup>7,73</sup>, Lars Feuerbach<sup>127</sup>, Mark Gerstein<sup>63,64,69</sup>, Gad Getz<sup>3,4,5,6</sup>, Mark P. Hamilton<sup>249</sup>, Henrik Hornshøj<sup>152</sup>, Todd A. Johnson<sup>233</sup>, Andre Kahles<sup>12,113,114,115,174</sup>, Abdullah Kahraman<sup>250,251,252</sup>, Manolis Kellis<sup>3,253</sup>, Jan O. Korbel<sup>78</sup>, Morten Muhlig Nielsen<sup>152</sup>, Jakob Skou Pedersen<sup>152,153</sup>, Paz Polak<sup>3,4,6</sup>, Jüri Reimand<sup>1218</sup>, Esther Rheinbay<sup>3,6,19</sup>, Nicola D. Roberts<sup>1</sup>, Gunnar Rättsch<sup>112,113,114,115,116,117</sup>, Richard Sallari<sup>3</sup>, Nasa Sinnott-Armstrong<sup>3,4,5</sup>, Alfonso Valencia<sup>40,76</sup>, Miguel Vazquez<sup>40,41</sup>, Sebastian M. Waszak<sup>8</sup>, Joachim Weischenfeldt<sup>8,99,100</sup>, Christian von Mering<sup>252,254</sup> & Ekta Khurana<sup>70,71,72,73</sup>

**PCAWG Quality-Control Working Group** Sergi Beltran<sup>49,74</sup>, Ivo Buchhalter<sup>28,29,30</sup>, Peter J. Campbell<sup>12</sup>, Roland Eils<sup>28,30,142,143</sup>, Daniela S. Gerhard<sup>255</sup>, Gad Getz<sup>3,4,5,6</sup>, Marta Gut<sup>49,74</sup>, Barbara Hutter<sup>199,148,149</sup>, Daniel Hübschmann<sup>30,120,142,242,243</sup>, Kortine Kleinheinz<sup>28,30</sup>, Jan O. Korbel<sup>78</sup>, Dimitri Livitz<sup>3</sup>, Marc D. Perry<sup>14,15</sup>, Keiran M. Raine<sup>1</sup>, Esther Rheinbay<sup>3,6,19</sup>, Mara Rosenberg<sup>3,19</sup>, Gordon Saksena<sup>3</sup>, Matthias Schlesner<sup>28,31</sup>, Miranda D. Stobbe<sup>49,74</sup>, Jean-Rémi Trotta<sup>74</sup>, Johannes Werner<sup>28,160</sup>, Justin P. Whalley<sup>74</sup> & Ivo G. Gut<sup>49,74</sup>

**PCAWG SNV Calling Working Group** Matthew H. Bailey<sup>26,27</sup>, Beifang Niu<sup>256</sup>, Matthias Bieg<sup>138,139</sup>, Paul C. Boutros<sup>12,18,20,21</sup>, Ivo Buchhalter<sup>28,29,30</sup>, Adam P. Butler<sup>1</sup>, Ken Chen<sup>140</sup>, Zechen Chong<sup>141</sup>, Oliver Drechsel<sup>47,49</sup>, Lewis Jonathan Dursi<sup>12,25</sup>, Roland Eils<sup>28,30,142,143</sup>, Kyle Ellrott<sup>38</sup>, Shadrille M. G. Espiritu<sup>12</sup>, Yu Fan<sup>32</sup>, Robert S. Fulton<sup>26,27,35</sup>, Shengjie Gao<sup>179</sup>, Josep L. Galzi<sup>40,144</sup>, Mark Gerstein<sup>63,64,69</sup>, Gad Getz<sup>3,4,5,6</sup>, Santiago Gonzalez<sup>78</sup>, Ivo G. Gut<sup>49,74</sup>, Faraj Hach<sup>145,146</sup>, Michael C. Heindold<sup>28,30</sup>, Julian M. Hess<sup>3,151</sup>, Jonathan Hinton<sup>1</sup>, Taobo Hu<sup>147</sup>, Vincent Huang<sup>12</sup>, Yi Huang<sup>157,257</sup>, Barbara Hutter<sup>199,148,149</sup>, David R. Jones<sup>1</sup>, Jongsun Jung<sup>150</sup>, Natalie Jäger<sup>29</sup>, Hyung-Lae Kim<sup>66</sup>, Kortine Kleinheinz<sup>28,30</sup>, Sushant Kumar<sup>63,64</sup>, Yogesh Kumar<sup>147</sup>, Christopher M. Lalansingh<sup>12</sup>, Ignaty Leshchiner<sup>3</sup>, Ivica Letunic<sup>62</sup>, Dimitri Livitz<sup>3</sup>, Eric Z. Ma<sup>147</sup>, Yosef E. Maruvka<sup>319,151</sup>, R. Jay Mash<sup>127,57</sup>, Michael D. McLellan<sup>26,27,35</sup>, Andrew Menzies<sup>1</sup>, Ana Milovanovic<sup>40</sup>, Morten Muhlig Nielsen<sup>152</sup>, Stephan Ossowski<sup>17,48,49</sup>, Nagarajan Paramasivam<sup>28,139</sup>, Jakob Skou Pedersen<sup>152,153</sup>, Marc D. Perry<sup>14,15</sup>, Montserrat Puiggròs<sup>40</sup>, Keiran M. Raine<sup>1</sup>, Esther Rheinbay<sup>3,6,19</sup>, Romina Royo<sup>40</sup>, S. Cenik Sahinalp<sup>146,154,155</sup>, Gordon Saksena<sup>3</sup>, Iman Sarrafi<sup>146,155</sup>, Matthias Schlesner<sup>28,31</sup>, Lucy Stebbings<sup>3</sup>, Chip Stewart<sup>3</sup>, Miranda D. Stobbe<sup>49,74</sup>, Jon W. Teague<sup>1</sup>, Grace Tiao<sup>3</sup>, David Torrents<sup>40,76</sup>, Jeremiah A. Wala<sup>3,6,156</sup>, Jiayin Wang<sup>27,58,157</sup>, Wenyi Wang<sup>32</sup>, Sebastian M. Waszak<sup>8</sup>, Joachim Weischenfeldt<sup>8,99,100</sup>, Michael C. Wendt<sup>27,158,159</sup>, Johannes Werner<sup>28,160</sup>, David A. Wheeler<sup>33,34</sup>, Zhenggang Wu<sup>147</sup>, Hong Xue<sup>147</sup>, Sergei Yakneen<sup>8</sup>, Takafumi N. Yamaguchi<sup>12</sup>, Kai Ye<sup>58,59</sup>, Venkata D. Yellapantula<sup>67,68</sup>, Christina K. Yung<sup>15</sup>, Junjun Zhang<sup>15</sup>, Li Ding<sup>26,27,35</sup> & Jared T. Simpson<sup>12,38</sup>

**PCAWG Drivers and Functional Interpretation Working Group** Federico Abascal<sup>1</sup>, Samirkumar B. Amin<sup>183,184,185</sup>, Gary D. Bader<sup>13</sup>, Prati Bandopadhyay<sup>3,258,259</sup>, Jonathan Barenboim<sup>12</sup>, Rameen Beroukhi<sup>3,6,167</sup>, Johanna Bertl<sup>152,206</sup>, Keith A. Boroevich<sup>81,233</sup>, Søren Brunal<sup>260,261</sup>, Peter J. Campbell<sup>12</sup>, Joana Carlevaro-Fita<sup>262,263,264</sup>, Dimple Chakravarty<sup>265,266</sup>, Calvin Wing Yiu Chan<sup>28,128</sup>, Ken Chen<sup>140</sup>, Jung Kyoong Choi<sup>267</sup>, Jordi Deu-Pons<sup>89,204</sup>, Priyanka Dhingra<sup>7,73</sup>, Klev Diamanti<sup>268</sup>, Lars Feuerbach<sup>127</sup>, J. Lynn Fink<sup>40,269</sup>, Nuno A. Fonseca<sup>7133</sup>, Joan Frigola<sup>204</sup>, Carlo Gambacorti-Passerini<sup>270</sup>, Dale W. Garsed<sup>271</sup>, Qianyun Guo<sup>153</sup>, Ivo G. Gut<sup>49,74</sup>, David Haan<sup>9</sup>, Mark P. Hamilton<sup>249</sup>, Nicholas J. Haradhvala<sup>3,19</sup>, Arif O. Harmanci<sup>64,272</sup>, Mohamed Helmy<sup>170</sup>, Carl Herrmann<sup>28,30,273</sup>, Julian M. Hess<sup>3,151</sup>, Asger Hobolth<sup>153,205</sup>, Ermin Hodzic<sup>155</sup>, Chen Hong<sup>271,278</sup>, Henrik Hornshøj<sup>152</sup>, Keren Isaev<sup>12,18</sup>, Jose M. G. Izarzugaza<sup>260</sup>, Rory Johnson<sup>263,274</sup>, Todd A. Johnson<sup>233</sup>, Malene Juul<sup>152</sup>, Randi Istrup Juul<sup>152</sup>, Andre Kahles<sup>12,113,114,115,174</sup>, Abdullah Kahraman<sup>250,251,252</sup>, Manolis Kellis<sup>3,253</sup>, Ekta Khurana<sup>70,71,72,73</sup>, Jaegil Kim<sup>3</sup>, Jong K. Kim<sup>275</sup>, Youngwook Kim<sup>163,164</sup>, Jan Komorowski<sup>268,276</sup>, Jan O. Korbel<sup>78</sup>, Sushant Kumar<sup>63,64</sup>, Andrés Lazo<sup>263,264,274</sup>, Erik Larsson<sup>12</sup>, Donghoon Lee<sup>64</sup>, Kjong-Van Lehmann<sup>112,113,114,115,173,174</sup>, Shantao Li<sup>64</sup>, Xiaotong Li<sup>64</sup>, Ziao Lin<sup>3,277</sup>, Eric Minwei Liu<sup>71,73,278</sup>, Lucas Lochovsky<sup>63,64,185</sup>, Shaokou Lou<sup>63,64</sup>, Tobias Madsen<sup>152</sup>, Kathleen Marchal<sup>279,280</sup>, Ifiigo Martincorena<sup>1</sup>, Alexander Martinez-Fundichely<sup>71,72,73</sup>, Yosef E. Maruvka<sup>319,151</sup>, Patrick D. McGillivray<sup>63</sup>, William Meyerson<sup>64,281</sup>, Ferran MuñozS<sup>67,89</sup>, Loris Mularoni<sup>67,89</sup>, Hidewaki Nakagawa<sup>81</sup>, Morten Muhlig Nielsen<sup>152</sup>, Marta Paczkowska<sup>12</sup>, Keunchil Park<sup>282,283</sup>, Kiejung Park<sup>284</sup>, Tirso Pons<sup>285</sup>, Sergio Pulido-Tamayo<sup>79,280</sup>, Jüri Reimand<sup>1218</sup>, Iker Reyes-Salazar<sup>87</sup>, Matthew A. Reyna<sup>286</sup>, Esther Rheinbay<sup>3,6,19</sup>, Mark A. Rubin<sup>274,287,288,289,290</sup>, Carlota Rubio-Perez<sup>87,89,202</sup>, S. Cenik Sahinalp<sup>146,154,155</sup>, Gordon Saksena<sup>3</sup>, Leonidas Salichos<sup>63,64</sup>, Chris Sander<sup>112,156,291,292</sup>, Steven E. Schumacher<sup>3,203</sup>, Mark Shackleton<sup>271</sup>, Ofer Shapira<sup>3156</sup>, Ciyue Shen<sup>292,293</sup>, Raunak Shrestha<sup>146</sup>, Shimin Shuai<sup>12,13</sup>, Nikos Sidiropoulos<sup>100</sup>, Lina Sieverling<sup>127,128</sup>, Nasa Sinnott-Armstrong<sup>3,4,5</sup>, Lincoln D. Stein<sup>12,13</sup>, David Tamborero<sup>87,89</sup>, Grace Tiao<sup>3</sup>, Tatsuhiko Tsunoda<sup>233,294,295,296</sup>, Husen M. Umer<sup>268,297</sup>, Liis Uskula-Reimand<sup>298,299</sup>, Alfonso Valencia<sup>40,76</sup>, Miguel Vazquez<sup>40,41</sup>, Lieve P. C. Verbeke<sup>280,300</sup>, Claes Wadelius<sup>301</sup>, Lina Wadi<sup>12</sup>, Jiayin Wang<sup>27,58,157</sup>, Jonathan Warrel<sup>63,64</sup>, Sebastian M. Waszak<sup>8</sup>, Joachim Weischenfeldt<sup>8,99,100</sup>, Guanming Wu<sup>302</sup>, Jun Yu<sup>303</sup>, Jing Zhang<sup>64</sup>, Xuanping Zhang<sup>157,304</sup>, Yan Zhang<sup>64,305,306</sup>, Zhongming Zhao<sup>307</sup>, Lihua Zou<sup>308</sup>, Christian von Mering<sup>252,254</sup>, Mark Gerstein<sup>63,64,69</sup>, Gad Getz<sup>3,4,5,6</sup>, Michael S. Lawrence<sup>3,19,233</sup>, Jakob Skou Pedersen<sup>152,153</sup>, Benjamin J. Raphael<sup>286</sup>, Joshua M. Stuart<sup>8</sup> & David A. Wheeler<sup>33,34</sup>

**PCAWG Transcriptome Working Group** Samirkumar B. Amin<sup>183,184,185</sup>, Philip Awadalla<sup>12,13</sup>, Peter J. Bailey<sup>186</sup>, Claudia Calabrese<sup>7,8</sup>, Aurélien Chateigner<sup>15</sup>, Isidro Cortés-Ciriano<sup>93,94,95</sup>, Brian Craft<sup>132</sup>, David Craft<sup>3,309</sup>, Chad J. Creighton<sup>199</sup>, Natalie R. Davidson<sup>112,114,115,173,173</sup>, Deniz Demircioğlu<sup>177,178</sup>, Serap Erkek<sup>8</sup>, Nuno A. Fonseca<sup>7133</sup>, Milana Frenkel-Morgenstern<sup>187</sup>, Mary J. Goldman<sup>132</sup>, Liliana Greger<sup>17</sup>, Jonathan Göke<sup>177,200</sup>, Yao He<sup>175</sup>, Katherine A. Hoadley<sup>23,24</sup>, Yong Hou<sup>179,180</sup>, Matthew R. Huska<sup>118</sup>, Andre Kahles<sup>12,113,114,115,174</sup>, Ekta Khurana<sup>70,71,72,73</sup>, Helena Kilpinen<sup>188</sup>, Jan O. Korbel<sup>78</sup>, Fabien C. Lamaze<sup>12</sup>, Kjong-Van Lehmann<sup>112,114,115,173,174</sup>, Chang Li<sup>179,180</sup>, Siliang Li<sup>179,180</sup>, Xiaobo Li<sup>179,180</sup>, Xinyue Li<sup>179</sup>, Dongbing Liu<sup>179,180</sup>, Fenglin Liu<sup>175,176</sup>, Xingmin Liu<sup>179,180</sup>, Maximilian G. Marin<sup>27</sup>, Julia Markowski<sup>118</sup>, Matthew Meyerson<sup>3,6,156</sup>, Tannistha Nandi<sup>189</sup>, Morten Muhlig Nielsen<sup>152</sup>, Akinyemi I. Ojesina<sup>190,191,192</sup>, B. F. Francis Ouellette<sup>16,17</sup>

Qiang Pan-Hammarström<sup>179,193</sup>, Peter J. Park<sup>94,95</sup>, Chandra Sekhar Pedamallu<sup>3,6,167</sup>, Jakob Skou Pedersen<sup>152,153</sup>, Marc D. Perry<sup>14,15</sup>, Roland F. Schwarz<sup>7118,119,120</sup>, Yuichi Shiraishi<sup>139</sup>, Reiner Siebert<sup>79,80</sup>, Cameron M. Soulette<sup>37</sup>, Stefan G. Stark<sup>115,173,181,182</sup>, Oliver Stegle<sup>7,8,124</sup>, Hong Su<sup>179,180</sup>, Patrick Tan<sup>189,194,195,196</sup>, Bin Tean Teh<sup>194,195,196,197,198</sup>, Lara Urban<sup>7,8</sup>, Jian Wang<sup>179</sup>, Sebastian M. Waszak<sup>8</sup>, Kui Wu<sup>179,180</sup>, Qian Xiang<sup>207</sup>, Heng Xiong<sup>179,180</sup>, Sergei Yakneen<sup>8</sup>, Huanming Yang<sup>179</sup>, Chen Ye<sup>179,180</sup>, Christina K. Yung<sup>15</sup>, Fan Zhang<sup>175</sup>, Junjun Zhang<sup>15</sup>, Xiuqing Zhang<sup>179</sup>, Zemin Zhang<sup>175,201</sup>, Liangtao Zheng<sup>175</sup>, Jingchun Zhu<sup>132</sup>, Shida Zhu<sup>179,180</sup>, Alvis Brazma<sup>7</sup>, Angela N. Brooks<sup>3,37,156</sup> & Gunnar Rättsch<sup>112,113,114,115,116,117</sup>

**PCAWG Epigenome Working Group** Hiroyuki Aburatani<sup>310</sup>, Hans Binder<sup>311,312</sup>, Huy Q. Dinh<sup>313</sup>, Lars Feuerbach<sup>127</sup>, Shengjie Gao<sup>179</sup>, Ivo G. Gut<sup>49,74</sup>, Simon C. Heath<sup>79</sup>, Steve Hoffmann<sup>311,312,314,315</sup>, Charles David Imbusch<sup>127</sup>, Ekta Khurana<sup>70,71,72,73</sup>, Helene Kretzmer<sup>312,315</sup>, Peter W. Laird<sup>316</sup>, Jose I. Martin-Subero<sup>76,317</sup>, Genta Nagae<sup>310,318</sup>, Paz Polak<sup>3,4,6</sup>, Hui Shen<sup>319</sup>, Reiner Siebert<sup>79,80</sup>, Nasa Sinnott-Armstrong<sup>3,4,5</sup>, Miranda D. Stobbe<sup>49,74</sup>, Qi Wang<sup>246</sup>, Dieter Weichenhan<sup>320</sup>, Sergei Yakneen<sup>8</sup>, Wanding Zhou<sup>319</sup>, Benjamin P. Berman<sup>313,321,322</sup>, Benedikt Brors<sup>127,149,323</sup> & Christoph Plass<sup>320</sup>

**PCAWG Structural Variation Working Group** Kadir C. Akdemir<sup>140</sup>, Eva G. Alvarez<sup>42,43,44</sup>, Adrian Baez-Ortega<sup>55</sup>, Paul C. Boutros<sup>12,18,20,21</sup>, David D. L. Bowtell<sup>271</sup>, Benedikt Brors<sup>127,149,323</sup>, Kathleen H. Burns<sup>324,325</sup>, John Busanovich<sup>3,326</sup>, Kin Chan<sup>327</sup>, Ken Chen<sup>140</sup>, Isidro Cortés-Ciriano<sup>93,94,95</sup>, Ana Dueso-Barroso<sup>40</sup>, Andrew J. Dunford<sup>3</sup>, Paul A. Edwards<sup>328,329</sup>, Xavier Estivill<sup>47,84</sup>, Dariush Etemadmoghadam<sup>271</sup>, Lars Feuerbach<sup>127</sup>, J. Lynn Fink<sup>40,269</sup>, Milana Frenkel-Morgenstern<sup>187</sup>, Dale W. Garsed<sup>271</sup>, Mark Gerstein<sup>63,64,69</sup>, Dmitry A. Gordenin<sup>97</sup>, David Haan<sup>9</sup>, James E. Haber<sup>323</sup>, Julian M. Hess<sup>3,151</sup>, Barbara Hutter<sup>199,148,149</sup>, Marcin Imielinski<sup>165,166</sup>, David T. W. Jones<sup>331,332</sup>, Young Seok Ju<sup>126,7</sup>, Marat D. Kazanov<sup>333,334,335</sup>, Leszek J. Klimczak<sup>98</sup>, Yungil Koh<sup>336,337</sup>, Jan O. Korbel<sup>78</sup>, Kiran Kumar<sup>3</sup>, Eunjung Alice Lee<sup>338</sup>, Jake June-Koo Lee<sup>94,95</sup>, Yilong Li<sup>1</sup>, Andy G. Lynch<sup>328,329,339</sup>, Geoff Macintyre<sup>328</sup>, Florian Markowitz<sup>328,329</sup>, Ifiigo Martincorena<sup>1</sup>, Alexander Martinez-Fundichely<sup>71,72,73</sup>, Matthew Meyerson<sup>3,6,156</sup>, Satoru Miyano<sup>39</sup>, Hidewaki Nakagawa<sup>81</sup>, Fabio C. P. Navarro<sup>63</sup>, Stephan Ossowski<sup>17,48,49</sup>, Peter J. Park<sup>94,95</sup>, John V. Pearson<sup>340,341</sup>, Montserrat Puiggròs<sup>40</sup>, Karsten Rippe<sup>190</sup>, Nicola D. Roberts<sup>1</sup>, Steven A. Roberts<sup>107</sup>, Bernardo Rodriguez-Martin<sup>42,43,44</sup>, Steven E. Schumacher<sup>3,203</sup>, Ralph Scully<sup>342</sup>, Mark Shackleton<sup>271</sup>, Nikos Sidiropoulos<sup>100</sup>, Lina Sieverling<sup>127,128</sup>, Chip Stewart<sup>3</sup>, David Torrents<sup>40,76</sup>, Jose M. C. Tubio<sup>42,43,44</sup>, Izor Villasante<sup>40</sup>, Nicola Waddell<sup>340,341</sup>, Jeremiah A. Wala<sup>3,6,156</sup>, Joachim Weischenfeldt<sup>8,99,100</sup>, Lixing Yang<sup>343</sup>, Xiaotong Yao<sup>165,344</sup>, Sung-Soo Yoon<sup>337</sup>, Jorge Zamora<sup>142,43,44</sup>, Cheng-Zhong Zhang<sup>3,6,156</sup>, Rameen Beroukhi<sup>3,6,167</sup> & Peter J. Campbell<sup>12</sup>

**PCAWG Mutational Signatures Working Group** Ludmil B. Alexandrov<sup>1,101</sup>, Erik N. Bergstrom<sup>345</sup>, Arnoud Boot<sup>195,346</sup>, Paul C. Boutros<sup>12,18,20,21</sup>, Kin Chan<sup>327</sup>, Kyle Covington<sup>34</sup>, Akihiro Fujimoto<sup>81</sup>, Gad Getz<sup>3,4,5,6</sup>, Dmitry A. Gordenin<sup>97</sup>, Nicholas J. Haradhvala<sup>3,19</sup>, Mi Ni Huang<sup>195,346</sup>, S. M. Ashique Islam<sup>101</sup>, Marat D. Kazanov<sup>333,334,335</sup>, Jaegil Kim<sup>3</sup>, Leszek J. Klimczak<sup>98</sup>, Michael S. Lawrence<sup>3,19,233</sup>, Ifiigo Martincorena<sup>1</sup>, John R. McPherson<sup>195,346</sup>, Sandro Morganello<sup>1</sup>, Ville Mustonen<sup>347,348,349</sup>, Hidewaki Nakagawa<sup>81</sup>, Alvin Wei Tian Ng<sup>350</sup>, Paz Polak<sup>3,4,6</sup>, Stephanie D. Prokopec<sup>12</sup>, Steven A. Roberts<sup>107</sup>, Radhakrishnan Sabarinathan<sup>87,88,89</sup>, Natalie Saini<sup>97</sup>, Tatsuhiko Shibata<sup>226,227</sup>, Yuichi Shiraishi<sup>139</sup>, Ignacio Vázquez-García<sup>1,67,351,352</sup>, Yang Wu<sup>195,346</sup>, Fouad Youssif<sup>12</sup>, Willie Yu<sup>353</sup>, Steven G. Rozen<sup>195,196,346</sup>, Michael R. Stratton<sup>1</sup> & Bin Tean Teh<sup>194,195,196,197,198</sup>

**PCAWG Germline Cancer Genome Working Group** Ludmil B. Alexandrov<sup>1,101</sup>, Eva G. Alvarez<sup>42,43,44</sup>, Adrian Baez-Ortega<sup>55</sup>, Matthew H. Bailey<sup>26,27</sup>, Mattias Bosio<sup>40,47,49</sup>, G. Steven Bova<sup>126</sup>, Alvis Brazma<sup>7</sup>, Alicia L. Bruzos<sup>42,43,44</sup>, Ivo Buchhalter<sup>28,29,30</sup>, Carlos D. Bustamante<sup>45,78</sup>, Atul J. Butte<sup>121</sup>, Andy Cafferkey<sup>7</sup>, Claudia Calabrese<sup>7,8</sup>, Peter J. Campbell<sup>12</sup>, Stephen J. Chanock<sup>96</sup>, Nilanjan Chatterjee<sup>122,123</sup>, Jieming Chen<sup>64,110</sup>, Francisco M. De La Vega<sup>45,46,78</sup>, Olivier Delaneau<sup>50,51,52</sup>, German M. Demidov<sup>47,48,49</sup>, Anthony DiBiase<sup>60</sup>, Li Ding<sup>26,27,35</sup>, Oliver Drechsel<sup>47,49</sup>, Lewis Jonathan Dursi<sup>12,25</sup>, Douglas F. Easton<sup>92,93</sup>, Serap Erkek<sup>8</sup>, Giorgio Escarmis<sup>47,103,104</sup>, Erik Garrison<sup>1</sup>, Mark Gerstein<sup>63,64,69</sup>, Gad Getz<sup>3,4,5,6</sup>, Dmitry A. Gordenin<sup>97</sup>, Nina Habermann<sup>8</sup>, Olivier Harismendy<sup>125</sup>, Eoghan Harrington<sup>105</sup>, Shuto Hayashi<sup>39</sup>, Seong Gu Heo<sup>172</sup>, José María Heredia-Genestar<sup>64</sup>, Aliaksei Z. Holik<sup>47</sup>, Eun Pyo Hong<sup>172</sup>, Xing Hua<sup>96</sup>, Kuan-lin Huang<sup>27,61</sup>, Seiya Imoto<sup>39</sup>, Sissel Juul<sup>105</sup>, Ekta Khurana<sup>70,71,72,73</sup>, Hyung-Lae Kim<sup>66</sup>, Youngwook Kim<sup>163,164</sup>, Leszek J. Klimczak<sup>98</sup>, Roelof Koster<sup>108</sup>, Sushant Kumar<sup>63,64</sup>, Ivica Letunic<sup>62</sup>, Yilong Li<sup>1</sup>, Tomas Marques-Bonet<sup>4,75,76,77</sup>, R. Jay Mash<sup>127,57</sup>, Simon Mayes<sup>106</sup>, Michael D. McLellan<sup>26,27,35</sup>, Lisa Mirabello<sup>96</sup>, Francesc Muiyas<sup>47,48,49</sup>, Hidewaki Nakagawa<sup>81</sup>, Arcadi Navarro<sup>74,75,76</sup>, Steven J. Newhouse<sup>1</sup>, Stephan Ossowski<sup>17,48,49</sup>, Ji Wan Park<sup>172</sup>, Esa Pitkänen<sup>8</sup>, Aparna Prasad<sup>49</sup>, Raquel Rabinonet<sup>47,49,102</sup>, Benjamin Raeder<sup>8</sup>, Tobias Rausch<sup>8</sup>, Steven A. Roberts<sup>107</sup>, Bernardo Rodriguez-Martin<sup>42,43,44</sup>, Vasilisa A. Rudneva<sup>8</sup>, Gunnar Rättsch<sup>112,113,114,115,116,117</sup>, Natalie Saini<sup>97</sup>, Matthias Schlesner<sup>28,31</sup>, Roland F. Schwarz<sup>7118,119,120</sup>, Ayellet V. Segre<sup>3,53</sup>, Tal Shmaya<sup>46</sup>, Suyash S. Shringarpure<sup>56</sup>, Nikos Sidiropoulos<sup>100</sup>, Reiner Siebert<sup>79,80</sup>, Jared T. Simpson<sup>12</sup>, Lei Song<sup>96</sup>, Oliver Stegle<sup>7,8,124</sup>, Hana Susak<sup>47,49</sup>, Tomas J. Tanskanen<sup>109</sup>, Grace Tiao<sup>3</sup>, Marta Toja<sup>14</sup>, Jose M. C. Tubio<sup>42,43,44</sup>, Daniel J. Turner<sup>106</sup>, Lara Urban<sup>7,8</sup>, Sebastian M. Waszak<sup>8</sup>, David C. Wedge<sup>165,66</sup>, Joachim Weischenfeldt<sup>8,99,100</sup>, David A. Wheeler<sup>33,34</sup>, Mark H. Wright<sup>45</sup>, Dai-Ying Wu<sup>46</sup>, Tian Xia<sup>354</sup>, Sergei Yakneen<sup>8</sup>, Kai Ye<sup>58,59</sup>, Venkata D. Yellapantula<sup>67,68</sup>, Jorge Zamora<sup>142,43,44</sup>, Bin Zhu<sup>96</sup>, Xavier Estivill<sup>47,84</sup> & Jan O. Korbel<sup>78</sup>

**PCAWG Pathology and Clinical Correlates Working Group** Fatima Al-Shahrou<sup>134</sup>, Gurnit Atwal<sup>12,13,17</sup>, Peter J. Bailey<sup>186</sup>, Paul C. Boutros<sup>12,18,20,21</sup>, Peter J. Campbell<sup>12</sup>, David K. Chang<sup>186,355</sup>, Susanna L. Cooke<sup>186</sup>, Vikram Deshpande<sup>19</sup>, Bishoy M. Faltas<sup>117</sup>, William C. Faquin<sup>19</sup>, Gad Getz<sup>3,4,5,6</sup>, Syed Haider<sup>12</sup>, Wei Jiao<sup>12</sup>, Vera B. Kaiser<sup>356</sup>, Rosa Karl<sup>357</sup>, Mamoru Kato<sup>358</sup>, Kirsten Kübler<sup>3,6,19</sup>, Alexander J. Lazar<sup>22</sup>, Constance H. Li<sup>12,18</sup>, David N. Louis<sup>19</sup>, Adam Margolin<sup>38</sup>, Sancha Martin<sup>1,359</sup>, Hardeep K. Nahal-Bose<sup>15</sup>, G. Petur Nielsen<sup>19</sup>, Serena Nik-Zainal<sup>1360,361,362</sup>

Larsson Omberg<sup>85</sup>, Christine P'ng<sup>12</sup>, Marc D. Perry<sup>14,15</sup>, Paz Polak<sup>3,4,6</sup>, Esther Rheinbay<sup>3,6,19</sup>, Mark A. Rubin<sup>274,287,288,289,290</sup>, Colin A. Semple<sup>356</sup>, Dennis C. Sgroi<sup>19</sup>, Tatsuhiko Shibata<sup>226,227</sup>, Reiner Siebert<sup>79,80</sup>, Jaclyn Smith<sup>38</sup>, Miranda D. Stobbe<sup>49,74</sup>, Ren X. Sun<sup>12</sup>, Kevin Thai<sup>15</sup>, Derek W. Wright<sup>363,364</sup>, Chin-Lee Wu<sup>19</sup>, Ke Yuan<sup>328,359,365</sup>, Junjun Zhang<sup>15</sup>, Andrew V. Biankin<sup>186,355,366,367</sup>, Levi Garraway<sup>156</sup>, Sean M. Grimmond<sup>368</sup>, Katherine A. Hoadley<sup>23,24</sup> & Lincoln D. Stein<sup>12,13</sup>

**PCAWG Evolution & Heterogeneity Working Group** David J. Adams<sup>1</sup>, Pavana Anur<sup>369</sup>, Rameen Beroukhi<sup>316,167</sup>, Paul C. Boutros<sup>12,18,20,21</sup>, David D. L. Bowtell<sup>271</sup>, Peter J. Campbell<sup>12</sup>, Shaolong Cao<sup>32</sup>, Elizabeth L. Christie<sup>271</sup>, Marek Cmero<sup>370,371,372</sup>, Yupeng Cun<sup>373</sup>, Kevin J. Dawson<sup>1</sup>, Jonas Demeulemeester<sup>91,92</sup>, Stefan C. D'Entro<sup>1,65,91</sup>, Amit G. Deshwar<sup>374</sup>, Nilgun Donmez<sup>146,155</sup>, Ruben M. Drews<sup>328</sup>, Roland Eils<sup>28,30,142,143</sup>, Yu Fan<sup>32</sup>, Matthew W. Fittall<sup>91</sup>, Dale W. Garsed<sup>271</sup>, Moritz Gerstung<sup>78</sup>, Gad Getz<sup>3,4,5,6</sup>, Santiago Gonzalez<sup>78</sup>, Gavin Ha<sup>3</sup>, Kerstin Haese<sup>91</sup>, Marcin Imielinski<sup>165,166</sup>, Lara Jerman<sup>8,375</sup>, Yuan Ji<sup>376,377</sup>, Clemency Jolly<sup>91</sup>, Kortine Kleinheinz<sup>28,30</sup>, Juhee Lee<sup>378</sup>, Henry Lee-Six<sup>1</sup>, Ignaty Leshchiner<sup>3</sup>, Dimitri Litvitz<sup>3</sup>, Geoff Macintyre<sup>328</sup>, Saleem Mallick<sup>146,155</sup>, Florian Markowitz<sup>328,329</sup>, Iñigo Martincorena<sup>1</sup>, Thomas J. Mitchell<sup>1,329,379</sup>, Quaid D. Morris<sup>171,380</sup>, Ville Mustonen<sup>347,348,349</sup>, Layla Oesper<sup>381</sup>, Martin Peifer<sup>373</sup>, Myron Peto<sup>382</sup>, Benjamin J. Raphael<sup>286</sup>, Daniel Rosebrock<sup>3</sup>, YuliaRubanova<sup>36,171</sup>, S.CenkSahinalp<sup>146,154,155</sup>, AdrianaSalcedo<sup>12</sup>, MatthiasSchlesner<sup>28,31</sup>, Steven E. Schumacher<sup>3,203</sup>, Subhajt Sengupta<sup>383</sup>, Ruian Shi<sup>380</sup>, Seung Jun Shin<sup>182</sup>, Oliver Spiro<sup>3</sup>, Lincoln D. Stein<sup>12,13</sup>, Maxime Tarabichi<sup>1,91</sup>, Shankar Vembu<sup>380,384</sup>, Ignacio Vázquez-García<sup>1,67,351,352</sup>, Wenyi Wang<sup>32</sup>, David A. Wheeler<sup>33,34</sup>, Jeffrey A. Wintersinger<sup>169,170,171</sup>, Tsun-Po Yang<sup>373</sup>, Xiaotong Yao<sup>165,344</sup>, Kaixian Yu<sup>385</sup>, Ke Yuan<sup>328,359,365</sup>, Hongtu Zhu<sup>386,387</sup>, Paul T. Spellman<sup>388</sup>, David C. Wedge<sup>165,66</sup> & Peter Van Looy<sup>91,92</sup>

**PCAWG Portals and Visualization Working Group** Fatima Al-Shahrour<sup>134</sup>, Elisabet Barrera<sup>7</sup>, Wojciech Bazant<sup>7</sup>, Alvis Brazma<sup>7</sup>, Isidro Cortés-Ciriano<sup>93,94,95</sup>, Brian Craft<sup>132</sup>, David Craft<sup>3,309</sup>, Vincent Ferretti<sup>15,86</sup>, Nuno A. Fonseca<sup>7133</sup>, Anja Füllgrabe<sup>7</sup>, Mary J. Goldman<sup>132</sup>, Wolfgang Huber<sup>8</sup>, Maria Keays<sup>7</sup>, Alfonso Muñoz<sup>7</sup>, Brian D. O'Connor<sup>15,37</sup>, Irene Papatheodorou<sup>7</sup>, Robert Petryszak<sup>7</sup>, Elena Piñero-Yáñez<sup>134</sup>, Alfonso Valencia<sup>40,76</sup>, John N. Weinstein<sup>136,137</sup>, Qian Xiang<sup>207</sup>, Junjun Zhang<sup>15</sup>, David Hausler<sup>132,135</sup>, Miguel Vazquez<sup>40,41</sup> & Jingchun Zhu<sup>132</sup>

**PCAWG Mitochondrial Genome and Immunogenomics Working Group** Peter J. Campbell<sup>12</sup>, Yiwen Chen<sup>32</sup>, Chad J. Creighton<sup>19</sup>, Li Ding<sup>26,27,35</sup>, Akihiro Fujimoto<sup>81</sup>, Masashi Fujita<sup>81</sup>, Gad Getz<sup>3,4,5,6</sup>, Leng Han<sup>304</sup>, Takanori Hasegawa<sup>39</sup>, Shuto Hayashi<sup>39</sup>, Seiya Imoto<sup>39</sup>, Young Seok Ju<sup>1,267</sup>, Hyung-Lae Kim<sup>56</sup>, Youngwook Kim<sup>163,164</sup>, Youngil Koh<sup>336,337</sup>, Mitsuhiko Komura<sup>39</sup>, Jun Li<sup>32</sup>, Iñigo Martincorena<sup>1</sup>, Satoru Miyano<sup>39</sup>, Shinichi Mizuno<sup>389</sup>, Keunchil Park<sup>282,283</sup>, Eigo Shimizu<sup>39</sup>, Yumeng Wang<sup>32,390</sup>, John N. Weinstein<sup>136,137</sup>, Yanxun Xu<sup>391</sup>, Rui Yamaguchi<sup>39</sup>, Fan Yang<sup>380</sup>, Yang Yang<sup>304</sup>, Christopher J. Yoon<sup>267</sup>, Sung-Soo Yang<sup>146,155</sup>, Yuan Yuan<sup>32</sup>, Fan Zhang<sup>175</sup>, Zemin Zhang<sup>175,201</sup>, Han Liang<sup>32</sup> & Hidewaki Nakagawa<sup>81</sup>

**PCAWG Pathogens Working Group** Malik Alawi<sup>392,393</sup>, Ivan Borozan<sup>12</sup>, Daniel S. Brewer<sup>394,395</sup>, Colin S. Cooper<sup>396,397</sup>, Nikita Desai<sup>15</sup>, Roland Eils<sup>28,30,142,143</sup>, Vincent Ferretti<sup>15,86</sup>, Adam Grundhoff<sup>392,398</sup>, Murat Iskar<sup>399</sup>, Kortine Kleinheinz<sup>28,30</sup>, Hidewaki Nakagawa<sup>81</sup>, Akinyemi I. Ojesina<sup>190,191,192</sup>, Chandra Sekhar Pedamallu<sup>3,6,167</sup>, Matthias Schlesner<sup>28,31</sup>, Xiaoping Su<sup>400</sup>, Marc Zapata<sup>399</sup> & Peter Lichter<sup>148,399</sup>

#### Providers of tumour-sequencing data

**Tumour-specific providers (ovarian cancer) in Australia** Kathryn Alsop<sup>271</sup>, Timothy J. C. Bruxner<sup>269</sup>, Angelika N. Christ<sup>269</sup>, Elizabeth L. Christie<sup>271</sup>, Stephen M. Corder<sup>401</sup>, Prue A. Cowin<sup>402</sup>, Ronny Drapkin<sup>403</sup>, Dariush Etemadmoghadam<sup>271</sup>, Sian Fereday<sup>402</sup>, Dale W. Garsed<sup>271</sup>, Joshy George<sup>185</sup>, Sean M. Grimmond<sup>368</sup>, Anne Hamilton<sup>402</sup>, Oliver Holmes<sup>340,341</sup>, Jillian A. Hung<sup>404,405</sup>, Karin S. Kassahn<sup>269,406</sup>, Stephen H. Kazakoff<sup>340,341</sup>, Catherine J. Kennedy<sup>407,408</sup>, Conrad R. Leonard<sup>340,341</sup>, Linda Mileskin<sup>271</sup>, David K. Miller<sup>269,355,409</sup>, Gisela Mir Arnau<sup>402</sup>, Chris Mitchell<sup>402</sup>, Felicity Newell<sup>340,341</sup>, Katia Nones<sup>340,341</sup>, Ann-Marie Patch<sup>340,341</sup>, John V. Pearson<sup>340,341</sup>, Michael C. Quinn<sup>340,341</sup>, Mark Shackleton<sup>271</sup>, Darrin F. Taylor<sup>269</sup>, Heather Thorne<sup>402</sup>, Nadia Traficante<sup>402</sup>, Ravikiran Veduru<sup>402</sup>, Nick M. Waddell<sup>341</sup>, Nicola Waddell<sup>340,341</sup>, Paul M. Waring<sup>410</sup>, Scott Wood<sup>340,341</sup>, Qinying Xu<sup>340,341</sup>, Anna deFazio<sup>411,412,413</sup> & David D. L. Bowtell<sup>271</sup>

**Tumour-specific providers (pancreatic cancer) in Australia** Matthew J. Anderson<sup>269</sup>, Davide Antonello<sup>414</sup>, Andrew P. Barbour<sup>415,416</sup>, Claudio Bassi<sup>414</sup>, Samantha Bersani<sup>417</sup>, Timothy J. C. Bruxner<sup>269</sup>, Ivana Cataldo<sup>417,418</sup>, David K. Chang<sup>186,355</sup>, Lorraine A. Chantrill<sup>355,419</sup>, Yoke-Eng Chiew<sup>411</sup>, Angela Chou<sup>355,420</sup>, Angelika N. Christ<sup>269</sup>, Sara Cingarlini<sup>229</sup>, Nicole Cloonan<sup>421</sup>, Vincenzo Corbo<sup>418,422</sup>, Maria Vittoria Davi<sup>423</sup>, Fraser R. Duthie<sup>186,424</sup>, J. Lynn Fink<sup>40,269</sup>, Anthony J. Gill<sup>355,420</sup>, Janet S. Graham<sup>186,425</sup>, Ivon Harliwong<sup>269</sup>, Oliver Holmes<sup>340,341</sup>, Nigel B. Jamieson<sup>186,367,426</sup>, Amber L. Johns<sup>355,409</sup>, Karin S. Kassahn<sup>269,406</sup>, Stephen H. Kazakoff<sup>340,341</sup>, James G. Kench<sup>355,420,427</sup>, Luca Landoni<sup>414</sup>, Rita T. Lawlor<sup>418</sup>, Conrad R. Leonard<sup>340,341</sup>, Andrea Mafficin<sup>418</sup>, Neil D. Merrett<sup>414,428</sup>, David K. Miller<sup>269,355,409</sup>, Marco Miotto<sup>414</sup>, Elizabeth A. Musgrove<sup>186</sup>, Adnan M. Nagrial<sup>355</sup>, Felicity Newell<sup>340,341</sup>, Katia Nones<sup>340,341</sup>, Karin A. Oien<sup>410,429</sup>, Marina Pajic<sup>355</sup>, Ann-Marie Patch<sup>340,341</sup>, John V. Pearson<sup>340,341</sup>, Mark Pinese<sup>430</sup>, Michael C. Quinn<sup>340,341</sup>, Alan J. Robertson<sup>269</sup>, Ilse Rooman<sup>355</sup>, Borislav C. Rusev<sup>418</sup>, Jaswinder S. Samra<sup>414,422</sup>, Maria Scardoni<sup>417</sup>, Christopher J. Scarlett<sup>355,431</sup>, Aldo Scarpa<sup>416</sup>, Elisabetta Sereni<sup>414</sup>, Katarzyna O. Sikora<sup>418</sup>, Michele Simbolo<sup>422</sup>, Morgan L. Taschuk<sup>15</sup>, Christopher W. Toon<sup>355</sup>, Giampaolo Tortora<sup>229,230</sup>, Caterina Vicentini<sup>418</sup>, Nick M. Waddell<sup>341</sup>, Nicola Waddell<sup>340,341</sup>, Scott Wood<sup>340,341</sup>, Jianmin Wu<sup>355</sup>, Qinying Xu<sup>340,341</sup>, Nikolajs Zeps<sup>432,433</sup>, Andrew V. Biankin<sup>186,355,366,367</sup> & Sean M. Grimmond<sup>368</sup>

**Tumour-specific providers (skin cancer) in Australia** Lauri A. Aaltonen<sup>111</sup>, Andreas Behren<sup>434</sup>, Hazel Burke<sup>435</sup>, Jonathan Cebon<sup>434</sup>, Rebecca A. Dagg<sup>436</sup>, Ricardo De Paoli-Iseppi<sup>437</sup>,

Ken Dutton-Regester<sup>340</sup>, Matthew A. Field<sup>438</sup>, Anna Fitzgerald<sup>439</sup>, Sean M. Grimmond<sup>368</sup>, Peter Hersey<sup>435</sup>, Oliver Holmes<sup>340,341</sup>, Valerie Jakrot<sup>435</sup>, Peter A. Johansson<sup>340</sup>, Hojabr Kakavand<sup>437</sup>, Stephen H. Kazakoff<sup>340,341</sup>, Richard F. Kefford<sup>440</sup>, Loretta M. S. Lau<sup>441</sup>, Conrad R. Leonard<sup>340,341</sup>, Georgina V. Long<sup>442</sup>, Felicity Newell<sup>340,341</sup>, Katia Nones<sup>340,341</sup>, Ann-Marie Patch<sup>340,341</sup>, John V. Pearson<sup>340,341</sup>, Hilda A. Pickett<sup>441</sup>, Antonia L. Pritchard<sup>340</sup>, Gulietta M. Pupo<sup>443</sup>, Robyn P. M. Saw<sup>442</sup>, Sarah-Jane Schramm<sup>444</sup>, Mark Shackleton<sup>271</sup>, Catherine A. Shang<sup>439</sup>, Ping Sheng<sup>442</sup>, Andrew J. Spillane<sup>442</sup>, Jonathan R. Stretch<sup>442</sup>, Varsha Tembe<sup>41,444</sup>, John F. Thompson<sup>442</sup>, Ricardo E. Vilain<sup>445</sup>, Nick M. Waddell<sup>341</sup>, Nicola Waddell<sup>340,341</sup>, James S. Wilmott<sup>442</sup>, Scott Wood<sup>340,341</sup>, Qinying Xu<sup>340,341</sup>, Jean Y. Yang<sup>446</sup>, Nicholas K. Hayward<sup>340,435</sup>, Graham J. Mann<sup>411,447</sup> & Richard A. Scolyer<sup>412,442,443,448</sup>

**Tumour-specific providers (pancreatic cancer) in Canada** John Bartlett<sup>448,450</sup>, Prashant Bavi<sup>451</sup>, Ivan Borozan<sup>12</sup>, Dianne E. Chadwick<sup>452</sup>, Michelle Chan-Seng-Yue<sup>451</sup>, Sean Cleary<sup>451,453</sup>, Ashton A. Connor<sup>453,454</sup>, Karolina Czajka<sup>241</sup>, Robert E. Denroche<sup>461</sup>, Neesha C. Dhan<sup>455</sup>, Jenna Eagles<sup>241</sup>, Vincent Ferretti<sup>15,86</sup>, Steven Gallinger<sup>451,453,454</sup>, Robert C. Grant<sup>451,454</sup>, David Hedley<sup>455</sup>, Michael A. Hollingsworth<sup>456</sup>, Gun Ho Jang<sup>451</sup>, Jeremy Johns<sup>241</sup>, Sangeetha Kalimuthu<sup>451</sup>, Sheng-Ben Liang<sup>457</sup>, Ilina Lungu<sup>451,458</sup>, Xuemei Luo<sup>2</sup>, Faridah Mbabaal<sup>241</sup>, Treasa A. McPherson<sup>454</sup>, Jessica K. Miller<sup>241</sup>, Malcolm J. Moore<sup>455</sup>, Faiyaz Notta<sup>451,459</sup>, Danielle Pasternack<sup>241</sup>, Gloria M. Petersen<sup>460</sup>, Michael H. A. Roehr<sup>18,451,461,462,463</sup>, Michelle Sam<sup>241</sup>, Iris Selander<sup>454</sup>, Stefano Serra<sup>410</sup>, Sagheed Shahab<sup>457</sup>, Morgan L. Taschuk<sup>15</sup>, Sarah P. Thayer<sup>456</sup>, Lee E. Timms<sup>241</sup>, Gavin W. Wilson<sup>12,451</sup>, Julie M. Wilson<sup>451</sup>, Bradly G. Wouters<sup>464</sup>, Thomas J. Hudson<sup>240,241</sup>, John D. McPherson<sup>241,451,465</sup> & Lincoln D. Stein<sup>12,13</sup>

**Tumour-specific providers (prostate cancer) in Canada** Timothy A. Beck<sup>15,466</sup>, Vinayak Bhandari<sup>12</sup>, Colin C. Collins<sup>146</sup>, Shadrielle M. G. Espiritu<sup>12</sup>, Neil E. Fleschner<sup>467</sup>, Natalie S. Fox<sup>12</sup>, Michael Fraser<sup>12</sup>, Syed Haider<sup>12</sup>, Lawrence E. Heisler<sup>468</sup>, Vincent Huang<sup>12</sup>, Emilie Lalonde<sup>12</sup>, Julie Livingstone<sup>12</sup>, John D. McPherson<sup>241,451,465</sup>, Alice Meng<sup>469</sup>, Veronica Y. Sabelnykova<sup>12</sup>, Adriana Salcedo<sup>12</sup>, Yu-Jia Shiah<sup>12</sup>, Theodorus Van der Kwast<sup>470</sup>, Takafumi N. Yamaguchi<sup>12</sup>, Paul C. Boutros<sup>12,18,20,21</sup> & Robert G. Bristow<sup>18,471,472,473,474</sup>

**Tumour-specific providers (gastric cancer) in China** Shuai Ding<sup>475</sup>, Daiming Fan<sup>476</sup>, Yong Hou<sup>179,180</sup>, Yi Huang<sup>157,257</sup>, Lin Li<sup>179</sup>, Siliang Li<sup>179,180</sup>, Dongbing Liu<sup>179,180</sup>, Xingmin Liu<sup>179,180</sup>, Yongzhan Nie<sup>476,477</sup>, Hong Su<sup>179,180</sup>, Jian Wang<sup>179</sup>, Kui Wu<sup>179</sup>, Xiao Xiao<sup>157</sup>, Rui Xing<sup>478</sup>, Shanlin Yang<sup>475</sup>, Yingyan Yu<sup>479</sup>, Xiuqing Zhang<sup>179</sup>, Yong Zhou<sup>179</sup>, Shida Zhu<sup>179,180</sup>, Youyong Lu<sup>221,222,223</sup> & Huanming Yang<sup>79</sup>

**Tumour-specific providers (renal cancer) in the EU and France** Rosamonde E. Banks<sup>480</sup>, Guillaume Bourque<sup>481,482</sup>, Alvis Brazma<sup>7</sup>, Paul Brennan<sup>483</sup>, Louis Letourneau<sup>484</sup>, Yasser Riazalhosseini<sup>482</sup>, Ghislaine Scelo<sup>483</sup>, Naveen Vasudev<sup>480,485</sup>, Juris Viksna<sup>486</sup>, Mark Lathrop<sup>482</sup> & Jörg Tost<sup>487</sup>

**Tumour-specific providers (breast cancer) in the EU & United Kingdom** Sung-Min Ahn<sup>488</sup>, Ludmil B. Alexandrov<sup>101</sup>, Samuel Aparicio<sup>489</sup>, Laurent Arnould<sup>490</sup>, M. R. Aure<sup>491</sup>, Shirram G. Bhosle<sup>1</sup>, Ewan Birney<sup>7</sup>, Ake Borg<sup>492</sup>, Sandrine Bouyart<sup>493</sup>, Arie B. Brinkman<sup>494</sup>, Jane E. Brock<sup>495</sup>, Annegien Broeks<sup>496</sup>, Adam P. Butler<sup>1</sup>, Anne-Lise Børresen-Dale<sup>491</sup>, Carlos Caldas<sup>497,498</sup>, Peter J. Campbell<sup>12</sup>, Suet-Feng Chin<sup>497,498</sup>, Helen Davies<sup>1,360,361</sup>, Christine Desmedt<sup>499,500</sup>, Luc Dirix<sup>501</sup>, Serge Dronov<sup>1</sup>, Anna Ehinger<sup>502</sup>, Jorunn E. Eyfjord<sup>503</sup>, Aquila Fatima<sup>203</sup>, John A. Foekens<sup>504</sup>, P. Andrew Futreal<sup>505</sup>, Øystein Garred<sup>506,507</sup>, Moritz Gerstung<sup>78</sup>, Dilip D. Giri<sup>508</sup>, Dominik Glodzik<sup>1</sup>, Dorte Grabau<sup>509</sup>, Holmfridur Hilmarsdottir<sup>503</sup>, Gerrit K. Hooijer<sup>510</sup>, Jocelyne Jacquemier<sup>511</sup>, Se Jin Jang<sup>512</sup>, Jon G. Jonasson<sup>503</sup>, Jos Jonkers<sup>513</sup>, Hyung-Yong Kim<sup>511</sup>, Tari A. King<sup>514,515</sup>, Stian Knappskog<sup>1516</sup>, Gu Kong<sup>511</sup>, Savitri Krishnamurthy<sup>517</sup>, Sunil R. Lakhani<sup>518</sup>, Anita Langerød<sup>491</sup>, Denis Larsimont<sup>519</sup>, Hee Jin Lee<sup>512</sup>, Jeong-Yeon Lee<sup>520</sup>, Ming Ta Michael Lee<sup>505</sup>, Yilong Li<sup>1</sup>, Ole Christian Lingjærde<sup>521</sup>, Gaetan MacGrogan<sup>522</sup>, John W. M. Martens<sup>504</sup>, Sancha Martin<sup>1,359</sup>, Iñigo Martincorena<sup>1</sup>, Andrew Menzies<sup>1</sup>, Sandro Morganello<sup>1</sup>, Ville Mustonen<sup>347,348,349</sup>, Serena Nik-Zainal<sup>1,360,361,362</sup>, Sarah O'Meara<sup>1</sup>, Iris Pauport<sup>214</sup>, Sarah Patch<sup>223</sup>, Xavier Pivo<sup>1,524</sup>, Elena Provenzano<sup>525</sup>, Colin A. Purdie<sup>526</sup>, Keiran M. Raine<sup>1</sup>, Manasa Ramakrishna<sup>1</sup>, Kamna Ramakrishnan<sup>1</sup>, Jorge Reis-Filho<sup>508</sup>, Andrea L. Richardson<sup>203</sup>, Markus Ringner<sup>492</sup>, Javier Bartolomé Rodríguez<sup>40</sup>, F. Germán Rodríguez-González<sup>261</sup>, Gilles Romieu<sup>527</sup>, Roberto Salgado<sup>410</sup>, Torill Sauer<sup>521</sup>, Rebecca Shepherd<sup>1</sup>, Anieta M. Sieuwerts<sup>504</sup>, Peter T. Simpson<sup>518</sup>, Marcel Smid<sup>504</sup>, Christos Sotiropoulos<sup>234</sup>, Paul N. Span<sup>528</sup>, Lucy Stebbings<sup>1</sup>, Ólafur Andri Stefánsson<sup>529</sup>, Alasdair Stenhouse<sup>530</sup>, Henk G. Stunnenberg<sup>180,531</sup>, Fred Sweep<sup>532</sup>, Benita Kiat Tee Tan<sup>533</sup>, Jon W. Teague<sup>1</sup>, Gilles Thomas<sup>534</sup>, Alastair M. Thompson<sup>530</sup>, Stefania Tommasi<sup>535</sup>, Isabelle Treilleux<sup>536,537</sup>, Andrew Tutt<sup>203</sup>, Naoto T. Ueno<sup>367</sup>, Steven Van Laere<sup>501</sup>, Peter Van Looy<sup>91,92</sup>, Gert G. Van den Eynden<sup>501</sup>, Peter Vermeulen<sup>501</sup>, Alain Viari<sup>518</sup>, Anne Vincent-Salomon<sup>531</sup>, David C. Wedge<sup>165,66</sup>, Bernice H. Wong<sup>538</sup>, Lucy Yates<sup>1</sup>, Xueqing Zou<sup>1</sup>, Carolien H. M. van Deurzen<sup>539</sup>, Marc J. van de Vijver<sup>410</sup>, Laura van't Veer<sup>540</sup> & Michael R. Stratton<sup>1</sup>

**Tumour-specific providers (malignant lymphoma) in Germany** Ole Ammerpohl<sup>541,542,543</sup>, Sietske Aukema<sup>542,543,544</sup>, Anke K. Bergmann<sup>545</sup>, Stephan H. Bernhart<sup>311,312,315</sup>, Hans Binder<sup>311,312</sup>, Arndt Borkhardt<sup>546</sup>, Christoph Borst<sup>547</sup>, Benedikt Brors<sup>1271,49,323</sup>, Birgit Burkhardt<sup>548</sup>, Alexander Claviez<sup>549</sup>, Roland Eils<sup>28,30,142,143</sup>, Maria Elisabeth Goebler<sup>550</sup>, Andrea Haake<sup>541</sup>, Siegfried Haas<sup>547</sup>, Martin Hansmann<sup>551</sup>, Jessica I. Hoell<sup>546</sup>, Steve Hoffmann<sup>311,312,314,315</sup>, Michael Hummel<sup>552</sup>, Daniel Hübschmann<sup>30,120,142,242,243</sup>, Dennis Karsch<sup>553</sup>, Wolfram Klapper<sup>544</sup>, Kortine Kleinheinz<sup>28,30</sup>, Michael Kneba<sup>553</sup>, Jan O. Korbel<sup>78</sup>, Helene Kretzmer<sup>212,315</sup>, Markus Kreuz<sup>554</sup>, Dieter Kube<sup>555</sup>, Ralf Küppers<sup>556</sup>, Chris Lawrenz<sup>143</sup>, Dido Lenze<sup>552</sup>, Peter Lichter<sup>148,399</sup>, Markus Loeffler<sup>554</sup>, Cristina López<sup>80,541</sup>, Luisa Mantovani-Löffler<sup>557</sup>, Peter Möller<sup>558</sup>, German Ott<sup>559</sup>, Bernhard Radlwimmer<sup>399</sup>, Julia Richter<sup>541,544</sup>, Marius Rohde<sup>560</sup>, Philip C. Rosenstiel<sup>561</sup>, Andreas Rosenwald<sup>562</sup>,

Markus B. Schilhabel<sup>561</sup>, Matthias Schlesner<sup>28,31</sup>, Stefan Schreiber<sup>563</sup>, Peter F. Stadler<sup>311,312,315</sup>, Peter Staib<sup>564</sup>, Stephan Stilgenbauer<sup>565</sup>, Stephanie Sungalee<sup>8</sup>, Monika Szczepanowski<sup>544</sup>, Umut H. Toprak<sup>30,566</sup>, Lorenz H. P. Trümper<sup>565</sup>, Rabea Wagener<sup>80,541</sup>, Thorsten Zenz<sup>149</sup> & Reiner Siebert<sup>79,80</sup>

**Tumour-specific providers (paediatric brain cancer) in Germany** Ivo Buchhalter<sup>28,29,30</sup>, Juergen Eils<sup>142,143</sup>, Roland Eils<sup>28,30,142,143</sup>, Volker Hovestadt<sup>399</sup>, Barbara Hutter<sup>159,148,149</sup>, David T. W. Jones<sup>331,332</sup>, Natalie Jäger<sup>28</sup>, Christof von Kalle<sup>120</sup>, Marcel Kool<sup>246,331</sup>, Jan O. Korbel<sup>78</sup>, Andrey Korshunov<sup>246</sup>, Pablo Landgraf<sup>567,568</sup>, Chris Lawrenz<sup>243</sup>, Hans Lehrach<sup>569</sup>, Paul A. Northcott<sup>570</sup>, Stefan M. Pfister<sup>246,331,571</sup>, Bernhard Radlwimmer<sup>399</sup>, Guido Reifenberger<sup>568</sup>, Matthias Schlesner<sup>28,31</sup>, Hans-Jörg Warnatz<sup>269</sup>, Joachim Weischenfeldt<sup>8,99,100</sup>, Stephan Wolf<sup>572</sup>, Marie-Laure Yaspo<sup>569</sup>, Marc Zapatka<sup>399</sup> & Peter Lichter<sup>148,399</sup>

**Tumour-specific providers (prostate cancer) in Germany** Yassen Assenov<sup>573</sup>, Benedikt Brors<sup>127,149,323</sup>, Juergen Eils<sup>142,143</sup>, Roland Eils<sup>28,30,142,143</sup>, Lars Feuerbach<sup>127</sup>, Clarissa Gerhauser<sup>320</sup>, Jan O. Korbel<sup>78</sup>, Chris Lawrenz<sup>243</sup>, Hans Lehrach<sup>569</sup>, Sarah Minner<sup>574</sup>, Christoph Plass<sup>320</sup>, Thorsten Schlomnig<sup>99,575</sup>, Nikos Sidirooulos<sup>100</sup>, Ronald Simon<sup>576</sup>, Hans-Jörg Warnatz<sup>569</sup>, Dieter Weichenhan<sup>320</sup>, Joachim Weischenfeldt<sup>8,99,100</sup>, Marie-Laure Yaspo<sup>569</sup>, Guido Sauter<sup>576</sup> & Holger Sültmann<sup>149,577</sup>

**Tumour-specific providers (oral cancer) in India** Nidhan K. Biswas<sup>578</sup>, Luca Landoni<sup>414</sup>, Arindam Maitra<sup>578</sup>, Partha P. Majumder<sup>578</sup> & Rajiv Sarin<sup>579</sup>

**Tumour-specific providers (pancreatic cancer) in Italy** Davide Antonello<sup>414</sup>, Stefano Barbj<sup>422</sup>, Claudio Bassi<sup>414</sup>, Samantha Bersani<sup>417</sup>, Giada Bonizzato<sup>418</sup>, Cinzia Cantù<sup>418</sup>, Ivana Caltado<sup>417,418</sup>, Sara Cingarlini<sup>229</sup>, Vincenzo Corbo<sup>418,422</sup>, Maria Vittoria Davi<sup>423</sup>, Angelo P. Dei Tos<sup>580</sup>, Matteo Fassan<sup>581</sup>, Sonia Vincimaldi<sup>418</sup>, Luca Landoni<sup>414</sup>, Rita T. Lawlor<sup>418</sup>, Claudio Luchini<sup>417</sup>, Andrea Mafficini<sup>418</sup>, Giuseppe Malleo<sup>414</sup>, Giovanni Marchegiani<sup>414</sup>, Michele Milella<sup>229</sup>, Marco Miotto<sup>414</sup>, Salvatore Paiella<sup>414</sup>, Antonio Pea<sup>414</sup>, Paolo Pederzoli<sup>414</sup>, Borislav C. Rusev<sup>418</sup>, Andrea Ruzzenante<sup>414</sup>, Roberto Salvia<sup>414</sup>, Maria Scardoni<sup>417</sup>, Elisabetta Sereni<sup>414</sup>, Michele Simbolo<sup>422</sup>, Nicola Sperandio<sup>418</sup>, Giampaolo Tortora<sup>229,230</sup>, Caterina Vicentini<sup>418</sup> & Aldo Scarpa<sup>418</sup>

**Tumour-specific providers (biliary tract cancer) in Japan** Yasuhito Arai<sup>226</sup>, Natsuko Hama<sup>226</sup>, Nobuyoshi Hiraoka<sup>582</sup>, Fumie Hosoda<sup>226</sup>, Mamoru Kato<sup>358</sup>, Hiromi Nakamura<sup>226</sup>, Hidenori Ojima<sup>583</sup>, Takuji Okusaka<sup>584</sup>, Yasushi Totoki<sup>226</sup>, Tomoko Urushidate<sup>227</sup> & Tatsuhiro Shibata<sup>226,227</sup>

**Tumour-specific providers (gastric cancer) in Japan** Yasuhito Arai<sup>226</sup>, Masashi Fukayama<sup>585</sup>, Natsuko Hama<sup>226</sup>, Fumie Hosoda<sup>226</sup>, Shumpei Ishikawa<sup>586</sup>, Hitoshi Katai<sup>587</sup>, Mamoru Kato<sup>358</sup>, Hiroto Katoh<sup>586</sup>, Daisuke Komura<sup>586</sup>, Genta Nagae<sup>310,318</sup>, Hiromi Nakamura<sup>226</sup>, Hirofumi Rokutan<sup>358</sup>, Mihoko Saito-Adachi<sup>358</sup>, Akihiro Suzuki<sup>310,588</sup>, Hirokazu Taniguchi<sup>589</sup>, Kenji Tatsuno<sup>310</sup>, Yasushi Totoki<sup>226</sup>, Tetsuo Ushiku<sup>585</sup>, Shinichi Yachida<sup>226,590</sup>, Shogo Yamamoto<sup>310</sup>, Hiroyuki Aburatani<sup>310</sup> & Tatsuhiro Shibata<sup>226,227</sup>

**Tumour-specific providers (liver cancer) in Japan** Hiroyuki Aburatani<sup>310</sup>, Hiroshi Aikata<sup>591</sup>, Koji Arihiro<sup>591</sup>, Shun-ichi Ariizumi<sup>592</sup>, Keith A. Boroevich<sup>81,233</sup>, Kazuaki Chayama<sup>591</sup>, Akihiro Fujimoto<sup>81</sup>, Masashi Fujita<sup>81</sup>, Mayuko Furuta<sup>81</sup>, Kunihiro Gotoh<sup>593</sup>, Natsuko Hama<sup>226</sup>, Takanori Hasegawa<sup>39</sup>, Shinya Hayami<sup>594</sup>, Shuto Hayashi<sup>39</sup>, Satoshi Hirano<sup>595</sup>, Seiya Imoto<sup>39</sup>, Mamoru Kato<sup>358</sup>, Yoshiiku Kawakami<sup>593</sup>, Kazuhiro Maejima<sup>81</sup>, Satoru Miyano<sup>39</sup>, Genta Nagae<sup>310,318</sup>, Hiromi Nakamura<sup>226</sup>, Toru Nakamura<sup>595</sup>, Kaoru Nakano<sup>81</sup>, Hideki Ohdan<sup>591</sup>, Aya Sasaki-Oku<sup>81</sup>, Yuichi Shiraiishi<sup>39</sup>, Hiroko Tanaka<sup>39</sup>, Yasushi Totoki<sup>226</sup>, Tatsuhiro Tsunoda<sup>233,294,295,296</sup>, Masaki Ueno<sup>594</sup>, Rui Yamaguchi<sup>39</sup>, Masakazu Yamamoto<sup>592</sup>, Hiroki Yamaue<sup>594</sup>, Hidewaki Nakagawa<sup>81</sup> & Tatsuhiro Shibata<sup>226,227</sup>

**Tumour-specific providers (biliary tract cancer) in Singapore** Su Pin Choo<sup>596</sup>, Ioana Cutcutache<sup>195,346</sup>, Narong Khuntikeo<sup>414,597</sup>, John R. McPherson<sup>195,346</sup>, Choon Kiat Ong<sup>598</sup>, Chawalit Pairrojku<sup>410</sup>, Irinel Popescu<sup>599</sup>, Steven G. Rozen<sup>195,196,346</sup>, Patrick Tan<sup>189,194,195,196</sup> & Bin Tean Teh<sup>194,195,196,197,198</sup>

**Tumour-specific providers (blood cancer) in South Korea** Keun Soo Ahn<sup>600</sup>, Hyung-Lae Kim<sup>56</sup>, Youngil Koh<sup>336,337</sup> & Sung-Soo Yoon<sup>337</sup>

**Tumour-specific providers (chronic lymphocytic leukaemia) in Spain** Marta Aymerich<sup>601</sup>, Josep L. Gelpi<sup>40,144</sup>, Ivo G. Gut<sup>49,74</sup>, Marta Gut<sup>49,74</sup>, Armando Lopez-Guillermo<sup>602</sup>, Carlos López-Otin<sup>603</sup>, Xose S. Puente<sup>603</sup>, Romina Royo<sup>40</sup>, David Torrents<sup>40,76</sup> & Elias Campo<sup>604,605</sup>

**Tumour-specific providers (bone cancer) in the United Kingdom** Fernanda Amary<sup>606</sup>, Daniel Baumhoer<sup>607</sup>, Sam Behjati<sup>1</sup>, Bodil Bjerkehagen<sup>607,608</sup>, P. A. Futreal<sup>505</sup>, Ola Myklebost<sup>516</sup>, Nischalan Pillay<sup>609</sup>, Patrick Tarpey<sup>610</sup>, Roberto Tirabosco<sup>611</sup>, Olga Zaikova<sup>612</sup>, Peter J. Campbell<sup>1,2</sup> & Adrienne M. Flanagan<sup>613</sup>

**Tumour-specific providers (chronic myeloid disorders) in the United Kingdom** Jacqueline Boultwood<sup>614</sup>, David T. Bowen<sup>1</sup>, Adam P. Butler<sup>1</sup>, Mario Cazzola<sup>615</sup>, Carlo Gambacorti-Passerini<sup>270</sup>, Anthony R. Green<sup>329</sup>, Eva Hellstrom-Lindberg<sup>616</sup>, Luca Malcovati<sup>615</sup>, Sancha Martin<sup>1,359</sup>, Jyoti Nangalia<sup>617</sup>, Elli Papaemmanuil<sup>1</sup>, Paresh Vyas<sup>340,618</sup> & Peter J. Campbell<sup>1,2</sup>

**Tumour-specific providers (oesophageal cancer) in the United Kingdom** Yeng Ang<sup>619</sup>, Hugh Barf<sup>620</sup>, Duncan Beardsmore<sup>621</sup>, Matthew Eldridge<sup>328</sup>, James Gossage<sup>622</sup>, Nicola Grehan<sup>361</sup>, George B. Hanna<sup>623</sup>, Stephen J. Hayes<sup>624,625</sup>, Ted R. Hupp<sup>626</sup>, David Khoo<sup>627</sup>,

Jesper Lagergren<sup>616,628</sup>, Laurence B. Lovat<sup>188</sup>, Shona MacRae<sup>136</sup>, Maria O'Donovan<sup>361</sup>, J. Robert O'Neill<sup>629</sup>, Simon L. Parsons<sup>630</sup>, Shaun R. Preston<sup>631</sup>, Sonia Puig<sup>632</sup>, Tom Roques<sup>633</sup>, Grant Sanders<sup>24</sup>, Sharmila Sothi<sup>634</sup>, Simon Tavaré<sup>28</sup>, Olga Tucker<sup>635</sup>, Richard Turkington<sup>636</sup>, Timothy J. Underwood<sup>637</sup>, Ian Welch<sup>638</sup> & Rebecca C. Fitzgerald<sup>661</sup>

**Tumour-specific providers (prostate cancer) in the United Kingdom** Daniel M. Berney<sup>639</sup>, Johann S. De Bono<sup>396</sup>, G. Steven Bova<sup>126</sup>, Daniel S. Brewer<sup>394,395</sup>, Adam P. Butler<sup>1</sup>, Declan Cahill<sup>640</sup>, Niedzica Camacho<sup>396</sup>, Nening M. Dennis<sup>640</sup>, Tim Dudderidge<sup>640,641</sup>, Sandra E. Edwards<sup>396</sup>, Cyril Fisher<sup>640</sup>, Christopher S. Foster<sup>642,643</sup>, Mohammed Ghori<sup>1</sup>, Pelvender Gill<sup>618</sup>, Vincent J. Gnanapragasam<sup>379,644</sup>, Gunes Gundem<sup>278</sup>, Freddie C. Hamdy<sup>645</sup>, Steve Hawkins<sup>328</sup>, Steven Hazel<sup>640</sup>, William Howat<sup>379</sup>, William B. Isaacs<sup>646</sup>, Katalin Karasz<sup>618</sup>, Jonathan D. Kay<sup>188</sup>, Vincent Khoo<sup>640</sup>, Zsofia Kote-Jarai<sup>396</sup>, Barbara Kremeyer<sup>1</sup>, Pardeep Kumar<sup>640</sup>, Adam Lambert<sup>618</sup>, Daniel A. Leongamornlert<sup>1,396</sup>, Naomi Livni<sup>640</sup>, Yong-Jie Lu<sup>639,647</sup>, Hayley J. Luxton<sup>188</sup>, Andy G. Lynch<sup>328,329,339</sup>, Luke Marsden<sup>618</sup>, Charlie E. Massie<sup>328</sup>, Lucy Matthews<sup>396</sup>, Erik Mayer<sup>640,648</sup>, Ultan McDermott<sup>1</sup>, Sue Merson<sup>396</sup>, Thomas J. Mitchell<sup>1,329,379</sup>, David E. Neal<sup>328,379</sup>, Anthony Ng<sup>649</sup>, David Nicol<sup>640</sup>, Christopher Ogden<sup>640</sup>, Edward W. Rowe<sup>640</sup>, Nimish C. Shah<sup>379</sup>, Jon W. Teague<sup>1</sup>, Sarah Thomas<sup>640</sup>, Alan Thompson<sup>640</sup>, Peter Van Looy<sup>91,92</sup>, Clare Verrill<sup>618,650</sup>, Tapio Visakorpi<sup>126</sup>, Anne Y. Warren<sup>379,651</sup>, David C. Wedge<sup>1,65,66</sup>, Hayley C. Whitaker<sup>188</sup>, Jorge Zamora<sup>1,42,43,44</sup>, Hongwei Zhang<sup>647</sup>, Nicholas van As<sup>640</sup>, Colin S. Cooper<sup>395,396,397</sup> & Rosalind A. Eeles<sup>396,640</sup>

**Tumour-specific providers (TCGA) in the United States** Adam Abeshouse<sup>278</sup>, Nishant Agrawal<sup>162</sup>, Rehan Akbani<sup>361,652</sup>, Hikmat Al-Ahmadie<sup>278</sup>, Monique Albert<sup>650</sup>, Kenneth Aldape<sup>400,653</sup>, Adrian Ally<sup>654</sup>, Yeng Ang<sup>619</sup>, Elizabeth L. Appelbaum<sup>271,88</sup>, Joshua Armenia<sup>655</sup>, Sylvia Asa<sup>630,656</sup>, J. Todd Auman<sup>657</sup>, Matthew H. Bailey<sup>26,27</sup>, Miruna Balasundaram<sup>654</sup>, Saianand Balu<sup>24</sup>, Jill Barnholtz-Sloan<sup>658,659</sup>, Hugh Barr<sup>620</sup>, John Bertlett<sup>449,450</sup>, Oliver F. Bathe<sup>660,661</sup>, Stephen B. Baylin<sup>123,641</sup>, Duncan Beardsmore<sup>621</sup>, Christopher Benz<sup>662</sup>, Andrew Berchuck<sup>663</sup>, Benjamin P. Berman<sup>313,321,322</sup>, Rameen Beroukhi<sup>3,6167</sup>, Mario Berrios<sup>664</sup>, Darel Bigner<sup>665</sup>, Michael Birrer<sup>19</sup>, Tom Bodenheimer<sup>24</sup>, Lori Boice<sup>632</sup>, Moiz S. Bootwalla<sup>664</sup>, Marcus Bosenberg<sup>666</sup>, Reanne Bowlby<sup>654</sup>, Jeffrey Boyd<sup>667</sup>, Russell R. Broadus<sup>400</sup>, Malcolm Brock<sup>668</sup>, Denise Brooks<sup>654</sup>, Susan Bullman<sup>3,167</sup>, Samantha J. Caeser-Johnson<sup>23</sup>, Thomas E. Carey<sup>669</sup>, Rebecca Craven<sup>654</sup>, Robert Cerrito<sup>670</sup>, Vishal S. Chandan<sup>671</sup>, Hsiao-Wei Chen<sup>619,655</sup>, Andrew D. Cherniack<sup>3,156,167</sup>, Jeremy Chien<sup>672</sup>, Juok Cho<sup>3</sup>, Eric Chuah<sup>654</sup>, Carrie Cibulskis<sup>3</sup>, Kristian Cibulskis<sup>3</sup>, Leslie Cope<sup>673</sup>, Matthew G. Cordes<sup>27,633</sup>, Kyle Covington<sup>34</sup>, Erin Curley<sup>674</sup>, Bogdan Czerniak<sup>400,627</sup>, Ludmila Danilova<sup>673</sup>, Ian J. Davis<sup>675</sup>, Timothy Defreitas<sup>3</sup>, John A. Demchok<sup>231</sup>, Noreen Dhalla<sup>654</sup>, Rajiv Dhir<sup>676</sup>, Li Ding<sup>26,27,35</sup>, HarshaVardhan Doddapaneni<sup>34</sup>, Adel El-Naggar<sup>400,627</sup>, Ina Felau<sup>231</sup>, Martin L. Ferguson<sup>677</sup>, Gaetano Finocchiaro<sup>678</sup>, Kwun M. Fong<sup>679</sup>, Scott Frazer<sup>3</sup>, William Friedman<sup>680</sup>, Catrina C. Fronick<sup>27,633</sup>, Lucinda A. Fulton<sup>27</sup>, Robert S. Fulton<sup>26,27,25</sup>, Stacey B. Gabriel<sup>3</sup>, Jianjiong Gao<sup>655</sup>, Nils Gehlenborg<sup>3,681</sup>, Jeffrey E. Gershenwald<sup>682,683</sup>, Gad Getz<sup>3,4,5,6</sup>, Ronald Ghossein<sup>508</sup>, Nasra H. Giam<sup>684</sup>, Richard A. Gibbs<sup>34</sup>, Carmen Gomez<sup>685</sup>, James Gossage<sup>622</sup>, Ramaswamy Govindan<sup>26</sup>, Nicola Grehan<sup>361</sup>, George B. Hanna<sup>623</sup>, D. Neil Hayes<sup>24,686,687</sup>, Stephen J. Hayes<sup>624,625</sup>, Apurva M. Hegde<sup>136,137</sup>, David I. Heiman<sup>3</sup>, Zachary Heins<sup>278</sup>, Austin J. Heppeler<sup>24</sup>, Katherine A. Hoadley<sup>23,24</sup>, Andrea Holbrook<sup>664</sup>, Robert A. Holt<sup>654</sup>, Alan P. Hoyle<sup>24</sup>, Ralph H. Hruban<sup>673</sup>, Jianhong Hu<sup>34</sup>, Mei Huang<sup>632</sup>, David Huntsman<sup>688</sup>, Ted R. Hupp<sup>626</sup>, Jason Huse<sup>278</sup>, Christine A. Iacobuzio-Donahue<sup>508</sup>, Michael Ittmann<sup>689,690</sup>, Joy C. Jayaseelan<sup>34</sup>, Stuart R. Jefferys<sup>24</sup>, Corbin D. Jones<sup>691</sup>, Steven J. M. Jones<sup>692</sup>, Hartmut Juhl<sup>693</sup>, Koo Jeong Kang<sup>694</sup>, Beth Karlan<sup>694</sup>, Katayoon Kasaian<sup>692</sup>, Electron Kebebew<sup>696,697</sup>, David Khoo<sup>627</sup>, Hark Kyun Kim<sup>698</sup>, Jaegil Kim<sup>3</sup>, Tari A. King<sup>314,515</sup>, Viktoriya Korchina<sup>34</sup>, Ritika Kundra<sup>619,655</sup>, Jesper Lagergren<sup>616,628</sup>, Phillip H. Lai<sup>664</sup>, Peter W. Laird<sup>316</sup>, Eric Lander<sup>3</sup>, Michael S. Lawrence<sup>319,233</sup>, Alexander J. Lazar<sup>27</sup>, Xuan Le<sup>699</sup>, Darlene Lee<sup>654</sup>, Douglas A. Levine<sup>278,700</sup>, Lara Lewis<sup>34</sup>, Tim Ley<sup>701</sup>, Haiyan Irene L<sup>654</sup>, Pei Lin<sup>3</sup>, W. M. Linehan<sup>702</sup>, Eric Minwei Liu<sup>1,73,278</sup>, Fei Fei Liu<sup>380</sup>, Laurence B. Lovat<sup>188</sup>, Yiling Liu<sup>137</sup>, Lisa Lype<sup>703</sup>, Yussanne Ma<sup>654</sup>, Shona MacRae<sup>136</sup>, Dennis T. Maglinte<sup>664,704</sup>, Elaine R. Mardis<sup>27,667,705</sup>, Jeffrey Marks<sup>414,706</sup>, Marco A. Marra<sup>654</sup>, Thomas J. Matthew<sup>37</sup>, Michael Mayo<sup>654</sup>, Karen McCune<sup>707</sup>, Michael D. McLellan<sup>26,27,35</sup>, Samuel R. Meier<sup>3</sup>, Showu Meng<sup>24</sup>, Matthew Meyerson<sup>3,6,156</sup>, Piotr A. Mieczkowski<sup>123</sup>, Tom Mikkelson<sup>708</sup>, Christopher A. Miller<sup>27</sup>, Gordon B. Mills<sup>709</sup>, Richard A. Moore<sup>654</sup>, Carl Morrison<sup>410,710</sup>, Lisle E. Mose<sup>24</sup>, Catherine D. Moser<sup>684</sup>, Andrew J. Mungall<sup>654</sup>, Karen Mungall<sup>654</sup>, David Mutch<sup>711</sup>, Donna M. Muzny<sup>712</sup>, Jerome Myers<sup>713</sup>, Yulia Newton<sup>27</sup>, Michael S. Noble<sup>3</sup>, Peter O'Donnell<sup>714</sup>, Brian Patrick O'Neill<sup>715</sup>, Angelica Ochoa<sup>278</sup>, Akinyemi I. Ojesina<sup>190,191,192</sup>, Joong-Won Park<sup>716</sup>, Joel S. Parker<sup>717</sup>, Simon L. Parsons<sup>630</sup>, Harvey Pass<sup>718</sup>, Alessandro Pastore<sup>112</sup>, Chandra Sekhar Pedamallu<sup>3,6167</sup>, Nathan A. Pennell<sup>719</sup>, Charles M. Perou<sup>720</sup>, Gloria M. Petersen<sup>460</sup>, Nicholas Petrelli<sup>721</sup>, Olga Potapova<sup>722</sup>, Shaun R. Preston<sup>631</sup>, Sonia Puig<sup>632</sup>, Janet S. Rader<sup>723</sup>, Suresh Ramalingam<sup>724</sup>, W. Kimryn Rathmell<sup>725</sup>, Victor Reuter<sup>508</sup>, Sheila M. Reynolds<sup>703</sup>, Matthew Ringel<sup>726</sup>, Jeffrey Roach<sup>727</sup>, Lewis R. Roberts<sup>984</sup>, A. Gordon Robertson<sup>654</sup>, Tom Roques<sup>633</sup>, Mark A. Rubin<sup>274,287,288,289,290</sup>, Sara Sadeghi<sup>654</sup>, Gordon Saksena<sup>3</sup>, Charles Saller<sup>728</sup>, Francisco Sanchez-Vega<sup>619,655</sup>, Chris Sander<sup>112,156,291,292</sup>, Grant Sanders<sup>24</sup>, Dirk Schadendorf<sup>148,729</sup>, Jacqueline E. Schein<sup>654</sup>, Heather K. Schmidt<sup>27</sup>, Nikolaus Schultz<sup>655</sup>, Steven E. Schumacher<sup>3,203</sup>, Richard A. Scolyer<sup>412,442,445,448</sup>, Raja Seethala<sup>730</sup>, Yasin Senbabaoglu<sup>112</sup>, Troy Selth<sup>674</sup>, Yan Shi<sup>24</sup>, Juliann Shih<sup>3167</sup>, Ilya Shmulevich<sup>703</sup>, Craig Shriver<sup>731</sup>, Sabina Signoretto<sup>1672,633,732</sup>, Janae V. Simons<sup>24</sup>, Samuel Singer<sup>414,733</sup>, Payal Sipahimalani<sup>654</sup>, Tara J. Skelly<sup>23</sup>, Karen Smith-McCune<sup>707</sup>, Nicholas D. Succi<sup>112</sup>, Heidi J. Sofia<sup>217</sup>, Matthew G. Soloway<sup>717</sup>, Anil K. Sood<sup>734</sup>, Sharmila Sothi<sup>634</sup>, Angela Tam<sup>654</sup>, Donghui Tan<sup>23</sup>, Roy Tarnuzzer<sup>231</sup>, Nina Thiessen<sup>654</sup>, R. Houston Thompson<sup>735</sup>, Leigh B. Thorne<sup>632</sup>, Ming Tsao<sup>630,656</sup>, Olga Tucker<sup>635</sup>, Richard Turkington<sup>636</sup>, Christopher Umbricht<sup>234,621,736</sup>, Timothy J. Underwood<sup>637</sup>, David J. Van Den Berg<sup>664</sup>, Erwin G. Van Meir<sup>737</sup>, Umadevi Veluvolu<sup>23</sup>, Douglas Voet<sup>3</sup>, Jiayin Wang<sup>27,58,157</sup>, Linghua Wang<sup>34</sup>, Zhining Wang<sup>231</sup>, Paul Weinberger<sup>738</sup>, John N. Weinstein<sup>136,137</sup>, Daniel J. Weisenberger<sup>664</sup>, Ian Welch<sup>638</sup>, David A. Wheeler<sup>33,34</sup>, Dennis Wigle<sup>739</sup>, Matthew D. Wilkerson<sup>23</sup>, Richard K. Wilson<sup>27,740</sup>, Boris Winterhoff<sup>41</sup>, Maciej Wiznerowicz<sup>242,743</sup>, Tina Wong<sup>27,654</sup>, Winghing Wong<sup>744</sup>, Liu Xi<sup>34</sup>, Liming Yang<sup>231</sup>, Christina Yau<sup>662</sup>, Venkata D. Yellapantula<sup>678</sup>, Hailei Zhang<sup>3</sup>, Hongxin Zhang<sup>655</sup>, Jiashan Zhang<sup>231</sup>, Carolyn M. Hutter<sup>217</sup> & Jean C. Zenklusen<sup>231</sup>

<sup>1</sup>Wellcome Sanger Institute, Hinxton, UK. <sup>2</sup>Department of Haematology, University of Cambridge, Cambridge, UK. <sup>3</sup>Broad Institute of MIT and Harvard, Cambridge, MA, USA. <sup>4</sup>Center for Cancer Research, Massachusetts General Hospital, Boston, MA, USA. <sup>5</sup>Department of Pathology, Massachusetts General Hospital, Boston, MA, USA. <sup>6</sup>Harvard Medical School, Boston, MA, USA. <sup>7</sup>European Molecular Biology Laboratory (EMBL), European Bioinformatics Institute (EMBL-EBI), Hinxton, UK. <sup>8</sup>European Molecular Biology Laboratory (EMBL), Genome Biology Unit, Heidelberg, Germany. <sup>9</sup>Biomedical Engineering Department, University of California Santa Cruz, Santa Cruz, CA, USA. <sup>10</sup>Adaptive Oncology Initiative, Ontario Institute for Cancer Research, Toronto, Ontario, Canada. <sup>11</sup>International Cancer Genome Consortium (ICGC)/ICGC Accelerating Research in Genomic Oncology (ICGC-ARGO) Secretariat, Toronto, Ontario, Canada. <sup>12</sup>Computational Biology Program, Ontario Institute for Cancer Research, Toronto, Ontario, Canada. <sup>13</sup>Department of Molecular Genetics, University of Toronto, Toronto, Ontario, Canada. <sup>14</sup>Department of Radiation Oncology, University of California San Francisco, San Francisco, CA, USA. <sup>15</sup>Genome Informatics Program, Ontario Institute for Cancer Research, Toronto, Ontario, Canada. <sup>16</sup>Department of Cell and Systems Biology, University of Toronto, Toronto, Ontario, Canada. <sup>17</sup>Genome Informatics, Ontario Institute for Cancer Research, Toronto, Ontario, Canada. <sup>18</sup>Department of Medical Biophysics, University of Toronto, Toronto, Ontario, Canada. <sup>19</sup>Massachusetts General Hospital, Boston, MA, USA. <sup>20</sup>Department of Pharmacology, University of Toronto, Toronto, Ontario, Canada. <sup>21</sup>University of California Los Angeles, Los Angeles, CA, USA. <sup>22</sup>Department of Pathology, Department of Genomic Medicine and Department of Translational Molecular Pathology, The University of Texas MD Anderson Cancer Center, Houston, TX, USA. <sup>23</sup>Department of Genetics, University of North Carolina at Chapel Hill, Chapel Hill, NC, USA. <sup>24</sup>Lineberger Comprehensive Cancer Center, University of North Carolina at Chapel Hill, Chapel Hill, NC, USA. <sup>25</sup>The Hospital for Sick Children, Toronto, Ontario, Canada. <sup>26</sup>Alvin J. Siteman Cancer Center, Washington University School of Medicine, St Louis, MO, USA. <sup>27</sup>The McDonnell Genome Institute, Washington University, St Louis, MO, USA. <sup>28</sup>Division of Theoretical Bioinformatics, German Cancer Research Center (DKFZ), Heidelberg, Germany. <sup>29</sup>Heidelberg Center for Personalized Oncology (DKFZ-HIPO), German Cancer Research Center, Heidelberg, Germany. <sup>30</sup>Institute of Pharmacy and Molecular Biotechnology, and BioQuant, Heidelberg University, Heidelberg, Germany. <sup>31</sup>Bioinformatics and Omics Data Analytics, German Cancer Research Center (DKFZ), Heidelberg, Germany. <sup>32</sup>Department of Bioinformatics and Computational Biology, The University of Texas MD Anderson Cancer Center, Houston, TX, USA. <sup>33</sup>Department of Molecular and Human Genetics, Baylor College of Medicine, Houston, TX, USA. <sup>34</sup>Human Genome Sequencing Center, Baylor College of Medicine, Houston, TX, USA. <sup>35</sup>Department of Genetics and Department of Medicine, Washington University in St Louis, St Louis, MO, USA. <sup>36</sup>Department of Computer Science, University of Toronto, Toronto, Ontario, Canada. <sup>37</sup>University of California Santa Cruz, Santa Cruz, CA, USA. <sup>38</sup>Computational Biology Program, Oregon Health & Science University, Portland, OR, USA. <sup>39</sup>The Institute of Medical Science, The University of Tokyo, Tokyo, Japan. <sup>40</sup>Barcelona Supercomputing Center (BSC), Barcelona, Spain. <sup>41</sup>Department of Clinical and Molecular Medicine, Faculty of Medicine and Health Sciences, Norwegian University of Science and Technology, Trondheim, Norway. <sup>42</sup>Centre for Research in Molecular Medicine and Chronic Diseases (CiMUS), Universidade de Santiago de Compostela, Santiago de Compostela, Spain. <sup>43</sup>Department of Zoology, Genetics and Physical Anthropology, Centre for Research in Molecular Medicine and Chronic Diseases (CiMUS), Universidade de Santiago de Compostela, Santiago de Compostela, Spain. <sup>44</sup>The Biomedical Research Centre (CINBIO), Universidade de Vigo, Vigo, Spain. <sup>45</sup>Department of Genetics, Stanford University School of Medicine, Stanford, CA, USA. <sup>46</sup>Annai Systems, Carlsbad, CA, USA. <sup>47</sup>Centre for Genomic Regulation (CRG), The Barcelona Institute of Science and Technology (BIST), Barcelona, Spain. <sup>48</sup>Institute of Medical Genetics and Applied Genomics, University of Tübingen, Tübingen, Germany. <sup>49</sup>Universitat Pompeu Fabra (UPF), Barcelona, Spain. <sup>50</sup>Department of Computational Biology, University of Lausanne, Lausanne, Switzerland. <sup>51</sup>Department of Genetic Medicine and Development, University of Geneva Medical School, Geneva, Switzerland. <sup>52</sup>Swiss Institute of Bioinformatics, University of Geneva, Geneva, Switzerland. <sup>53</sup>Department of Ophthalmology, Ocular Genomics Institute, Massachusetts Eye and Ear, Harvard Medical School, Boston, MA, USA. <sup>54</sup>Department of Experimental and Health Sciences, Institute of Evolutionary Biology (UPF-CSIC), Universitat Pompeu Fabra (UPF), Barcelona, Spain. <sup>55</sup>Department of Veterinary Medicine, Transmissible Cancer Group, University of Cambridge, Cambridge, UK. <sup>56</sup>Department of Biochemistry, College of Medicine, Ewha Womans University, Seoul, South Korea. <sup>57</sup>Division of Oncology, Washington University School of Medicine, St Louis, MO, USA. <sup>58</sup>School of Electronic and Information Engineering, Xi'an Jiaotong University, Xi'an, China. <sup>59</sup>The First Affiliated Hospital, Xi'an Jiaotong University, Xi'an, China. <sup>60</sup>Independent Consultant, Wellesley, MA, USA. <sup>61</sup>Icahn School of Medicine at Mount Sinai, New York, NY, USA. <sup>62</sup>Biobyte Solutions, Heidelberg, Germany. <sup>63</sup>Department of Molecular Biophysics and Biochemistry, Yale University, New Haven, CT, USA. <sup>64</sup>Program in Computational Biology and Bioinformatics, Yale University, New Haven, CT, USA. <sup>65</sup>Big Data Institute, Li Ka Shing Centre, University of Oxford, Oxford, UK. <sup>66</sup>Oxford NIHR Biomedical Research Centre, University of Oxford, Oxford, UK. <sup>67</sup>Department of Epidemiology and Biostatistics, Memorial Sloan Kettering Cancer Center, New York, NY, USA. <sup>68</sup>The McDonnell Genome Institute at Washington University School of Medicine, and Department of Genetics and Department of Medicine, Siteman Cancer Center, Washington University in St Louis, St Louis, MO, USA. <sup>69</sup>Department of Computer Science, Yale University, New Haven, CT, USA. <sup>70</sup>Sandra and Edward Meyer Cancer Center, Weill Cornell Medicine, New York, NY, USA. <sup>71</sup>Department of Physiology and Biophysics, Weill Cornell Medicine, New York, NY, USA. <sup>72</sup>Englander Institute for Precision Medicine, Weill Cornell Medicine, New York, NY, USA. <sup>73</sup>Institute for Computational Biomedicine, Weill Cornell Medicine, New York, NY, USA. <sup>74</sup>CNAG-CRG, Centre for Genomic Regulation (CRG), Barcelona Institute of Science and Technology (BIST), Barcelona, Spain. <sup>75</sup>Department of Experimental and Health Sciences, Institute of Evolutionary Biology (UPF-CSIC), Universitat Pompeu Fabra (UPF), Barcelona, Spain. <sup>76</sup>Institució Catalana de Recerca i Estudis Avançats (ICREA), Barcelona, Spain. <sup>77</sup>Institut Català de Paleontologia Miquel Crusafont, Universitat Autònoma de Barcelona, Barcelona, Spain. <sup>78</sup>Department of Biomedical Data Science, Stanford University School of Medicine, Stanford, CA, USA. <sup>79</sup>Human Genetics, University of Kiel, Kiel, Germany. <sup>80</sup>Institute of Human Genetics, Ulm University and Ulm University Medical Center, Ulm, Germany. <sup>81</sup>RIKEN Center for Integrative Medical Sciences, Yokohama, Japan. <sup>82</sup>Department of Oncology, Centre for Cancer Genetic Epidemiology, University of Cambridge, Cambridge, UK. <sup>83</sup>Department of Public Health and Primary Care, Centre for Cancer Genetic Epidemiology, University of Cambridge, Cambridge, UK. <sup>84</sup>Quantitative Genomics Laboratories (qGenomics), Barcelona, Spain. <sup>85</sup>Sage Bionetworks, Seattle, WA, USA. <sup>86</sup>Department of Biochemistry and Molecular Medicine, University of Montreal, Montreal, Quebec, Canada. <sup>87</sup>Institute for Research in Biomedicine (IRB Barcelona), Barcelona, Spain. <sup>88</sup>National Centre for Biological Sciences, Tata Institute of Fundamental Research, Bangalore, India. <sup>89</sup>Research Program on Biomedical Informatics, Universitat Pompeu Fabra (UPF), Barcelona, Spain. <sup>90</sup>Broad Institute of Harvard and MIT, Cambridge, MA, USA. <sup>91</sup>The Francis Crick Institute, London, UK. <sup>92</sup>University of Leuven, Leuven, Belgium. <sup>93</sup>Centre for Molecular Science Informatics, Department of Chemistry, University of Cambridge, Cambridge, UK. <sup>94</sup>Department of Biomedical Informatics, Harvard Medical School, Boston, MA, USA. <sup>95</sup>Ludwig Center at Harvard Medical School, Boston, MA, USA. <sup>96</sup>Division of Cancer Epidemiology and Genetics, National Cancer Institute, National Institutes of Health, Bethesda, MD, USA. <sup>97</sup>Genome Integrity and Structural Biology Laboratory, National Institute of Environmental Health Sciences (NIEHS), Durham, NC, USA. <sup>98</sup>Integrative Bioinformatics Support Group, National Institute of Environmental Health Sciences (NIEHS), Durham, NC, USA. <sup>99</sup>Department of Urology, Charité Universitätsmedizin Berlin, Berlin, Germany. <sup>100</sup>Finsen Laboratory and Biotech Research & Innovation Centre (BRIC), University of Copenhagen, Copenhagen, Denmark. <sup>101</sup>Department of Bioengineering and Department of Cellular and Molecular Medicine, Moores Cancer Center, University of California San Diego, La Jolla, CA, USA. <sup>102</sup>Department of Genetics, Microbiology and Statistics, University of Barcelona, IRSJD, IBUB, Barcelona, Spain. <sup>103</sup>CIBER Epidemiología y Salud Pública (CIBERESP), Madrid, Spain. <sup>104</sup>Research Group on Statistics, Econometrics and Health (GRECS), UdG, Barcelona, Spain. <sup>105</sup>Oxford Nanopore Technologies, New York, NY, USA. <sup>106</sup>Applications Department, Oxford Nanopore Technologies, Oxford, UK. <sup>107</sup>School of Molecular Biosciences and Center for Reproductive Biology, Washington State University, Pullman, WA, USA. <sup>108</sup>Laboratory of Translational Genomics, Division of Cancer Epidemiology and Genetics, National Cancer Institute, National Institutes of Health, Bethesda, MD, USA. <sup>109</sup>Department of Medical and Clinical Genetics, Genome-Scale Biology Research Program, University of Helsinki, Helsinki, Finland. <sup>110</sup>Integrated Graduate Program in Physical and Engineering Biology, Yale University, New Haven, CT, USA. <sup>111</sup>Applied Tumor Genomics Research Program, Research Programs Unit, University of Helsinki, Helsinki, Finland. <sup>112</sup>Computational Biology Center, Memorial Sloan Kettering Cancer Center, New York, NY, USA. <sup>113</sup>Department of Biology, ETH Zurich, Zurich, Switzerland. <sup>114</sup>Department of Computer Science, ETH Zurich, Zurich, Switzerland. <sup>115</sup>SIB Swiss Institute of Bioinformatics, Lausanne, Switzerland. <sup>116</sup>University Hospital Zurich, Zurich, Switzerland. <sup>117</sup>Weill Cornell Medical College, New York, NY, USA. <sup>118</sup>Berlin Institute for Medical Systems Biology, Max Delbrück Center for Molecular Medicine, Berlin, Germany. <sup>119</sup>German Cancer Consortium (DKTK), Partner site Berlin, Berlin, Germany. <sup>120</sup>German Cancer Research Center (DKFZ), Heidelberg, Germany. <sup>121</sup>Bakar Computational Health Sciences Institute and Department of Pediatrics, University of California, San Francisco, CA, USA. <sup>122</sup>Department of Biostatistics, Bloomberg School of Public Health, Johns Hopkins University, Baltimore, MD, USA. <sup>123</sup>Department of Oncology, The Johns Hopkins School of Medicine, The Sidney Kimmel Comprehensive Cancer Center at Johns Hopkins University, Baltimore, MD, USA. <sup>124</sup>Division of Computational Genomics and Systems Genetics, German Cancer Research Center (DKFZ), Heidelberg, Germany. <sup>125</sup>Department of Medicine and Moores Cancer Center, Division of Biomedical Informatics, UC San Diego School of Medicine, San Diego, CA, USA. <sup>126</sup>Faculty of Medicine and Health Technology, Tampere University and Tays Cancer Center, Tampere University Hospital, Tampere, Finland. <sup>127</sup>Division of Applied Bioinformatics, German Cancer Research Center (DKFZ), Heidelberg, Germany. <sup>128</sup>Faculty of Biosciences, Heidelberg University, Heidelberg, Germany. <sup>129</sup>Centre for Law and Genetics, University of Tasmania, Hobart, Tasmania, Australia. <sup>130</sup>Centre of Genomics and Policy, McGill University and Génomique Québec Innovation Centre, Montreal, Quebec, Canada. <sup>131</sup>Heidelberg Academy of Sciences and Humanities, Heidelberg, Germany. <sup>132</sup>UC Santa Cruz Genomics Institute, University of California Santa Cruz, Santa Cruz, CA, USA. <sup>133</sup>CIBIO/InBIO, Research Center in Biodiversity and Genetic Resources, Universidade do Porto, Vairão, Portugal. <sup>134</sup>Bioinformatics Unit, Spanish National Cancer Research Centre (CNIO), Madrid, Spain. <sup>135</sup>Howard Hughes Medical Institute, University of California Santa Cruz, Santa Cruz, CA, USA. <sup>136</sup>Cancer Unit, MRC University of Cambridge, Cambridge, UK. <sup>137</sup>Department of Bioinformatics and Computational Biology and Department of Systems Biology, The University of Texas MD Anderson Cancer Center, Houston, TX, USA. <sup>138</sup>Center for Digital Health, Berlin Institute of Health (BIH) and Charité-Universitätsmedizin Berlin, Berlin, Germany. <sup>139</sup>Heidelberg Center for Personalized Oncology (DKFZ-HIPO), German Cancer Research Center (DKFZ), Heidelberg, Germany. <sup>140</sup>Department of Bioinformatics and Computational Biology, University of Texas MD Anderson Cancer Center, Houston, TX, USA. <sup>141</sup>Department of Genetics and Informatics Institute, University of Alabama at Birmingham,

Birmingham, AL, USA. <sup>142</sup>Heidelberg University, Heidelberg, Germany. <sup>143</sup>New BIH Digital Health Center, Berlin Institute of Health (BIH) and Charité-Universitätsmedizin Berlin, Berlin, Germany. <sup>144</sup>Department of Biochemistry and Molecular Biomedicine, University of Barcelona, Barcelona, Spain. <sup>145</sup>Department of Urologic Sciences, University of British Columbia, Vancouver, British Columbia, Canada. <sup>146</sup>Vancouver Prostate Centre, Vancouver, British Columbia, Canada. <sup>147</sup>Division of Life Science and Applied Genomics Center, Hong Kong University of Science and Technology, Hong Kong, China. <sup>148</sup>German Cancer Consortium (DKTK), Heidelberg, Germany. <sup>149</sup>National Center for Tumor Diseases (NCT) Heidelberg, Heidelberg, Germany. <sup>150</sup>Genome Integration Data Center, Syntekabio, Daejeon, South Korea. <sup>151</sup>Massachusetts General Hospital Center for Cancer Research, Charlestown, MA, USA. <sup>152</sup>Department of Molecular Medicine (MOMA), Aarhus University Hospital, Aarhus, Denmark. <sup>153</sup>Bioinformatics Research Centre (BiRC), Aarhus University, Aarhus, Denmark. <sup>154</sup>Indiana University, Bloomington, IN, USA. <sup>155</sup>Simon Fraser University, Burnaby, British Columbia, Canada. <sup>156</sup>Dana-Farber Cancer Institute, Boston, MA, USA. <sup>157</sup>School of Computer Science and Technology, Xi'an Jiaotong University, Xi'an, China. <sup>158</sup>Department of Genetics, Washington University School of Medicine, St Louis, MO, USA. <sup>159</sup>Department of Mathematics, Washington University in St Louis, St Louis, MO, USA. <sup>160</sup>Department of Biological Oceanography, Leibniz Institute of Baltic Sea Research, Rostock, Germany. <sup>161</sup>Seven Bridges Genomics, Charlestown, MA, USA. <sup>162</sup>University of Chicago, Chicago, IL, USA. <sup>163</sup>Department of Health Sciences and Technology, Sungkyunkwan University School of Medicine, Seoul, South Korea. <sup>164</sup>Samsung Genome Institute, Seoul, South Korea. <sup>165</sup>New York Genome Center, New York, NY, USA. <sup>166</sup>Weill Cornell Medicine, New York, NY, USA. <sup>167</sup>Department of Medical Oncology, Dana-Farber Cancer Institute, Boston, MA, USA. <sup>168</sup>Rigshospitalet, Copenhagen, Denmark. <sup>169</sup>Department of Computer Science, University of Toronto, Toronto, Ontario, Canada. <sup>170</sup>The Donnelly Centre, University of Toronto, Toronto, Ontario, Canada. <sup>171</sup>Vector Institute, Toronto, Ontario, Canada. <sup>172</sup>Department of Medical Genetics, College of Medicine, Hallym University, Chuncheon, South Korea. <sup>173</sup>Department of Biology, ETH Zurich, Zurich, Switzerland. <sup>174</sup>University Hospital Zurich, Zurich, Switzerland. <sup>175</sup>Peking University, Beijing, China. <sup>176</sup>School of Life Sciences, Peking University, Beijing, China. <sup>177</sup>Computational and Systems Biology, Genome Institute of Singapore, Singapore, Singapore. <sup>178</sup>School of Computing, National University of Singapore, Singapore, Singapore. <sup>179</sup>BGI-Shenzhen, Shenzhen, China. <sup>180</sup>China National GeneBank-Shenzhen, Shenzhen, China. <sup>181</sup>Computational & Systems Biology Program, Memorial Sloan Kettering Cancer Center, New York, NY, USA. <sup>182</sup>Korea University, Seoul, South Korea. <sup>183</sup>Department of Genomic Medicine, The University of Texas MD Anderson Cancer Center, Houston, TX, USA. <sup>184</sup>Quantitative & Computational Biosciences Graduate Program, Baylor College of Medicine, Houston, TX, USA. <sup>185</sup>The Jackson Laboratory for Genomic Medicine, Farmington, CT, USA. <sup>186</sup>Wolfson Wohl Cancer Research Centre, Institute of Cancer Sciences, University of Glasgow, Bearsden, UK. <sup>187</sup>The Azrieli Faculty of Medicine, Bar-Ilan University, Safed, Israel. <sup>188</sup>University College London, London, UK. <sup>189</sup>Genome Institute of Singapore, Singapore, Singapore. <sup>190</sup>Department of Epidemiology, University of Alabama at Birmingham, Birmingham, AL, USA. <sup>191</sup>HudsonAlpha Institute for Biotechnology, Huntsville, AL, USA. <sup>192</sup>O'Neal Comprehensive Cancer Center, University of Alabama at Birmingham, Birmingham, AL, USA. <sup>193</sup>Department of Biosciences and Nutrition, Karolinska Institutet, Stockholm, Sweden. <sup>194</sup>Cancer Science Institute of Singapore, National University of Singapore, Singapore, Singapore. <sup>195</sup>Programme in Cancer & Stem Cell Biology, Duke-NUS Medical School, Singapore, Singapore. <sup>196</sup>SingHealth, Duke-NUS Institute of Precision Medicine, National Heart Centre Singapore, Singapore, Singapore. <sup>197</sup>Institute of Molecular and Cell Biology, Singapore, Singapore. <sup>198</sup>Laboratory of Cancer Epigenome, Division of Medical Science, National Cancer Centre Singapore, Singapore, Singapore. <sup>199</sup>Department of Medicine, Baylor College of Medicine, Houston, TX, USA. <sup>200</sup>National Cancer Centre Singapore, Singapore, Singapore. <sup>201</sup>BIOPIC, ICG and College of Life Sciences, Peking University, Beijing, China. <sup>202</sup>Vall d'Hebron Institute of Oncology (VHIO), Barcelona, Spain. <sup>203</sup>Department of Cancer Biology, Dana-Farber Cancer Institute, Boston, MA, USA. <sup>204</sup>Institute for Research in Biomedicine (IRB Barcelona), The Barcelona Institute of Science and Technology (BIST), Barcelona, Spain. <sup>205</sup>Department of Mathematics, Aarhus University, Aarhus, Denmark. <sup>206</sup>Institut Hospital del Mar d'Investigacions Mèdiques (IMIM), Barcelona, Spain. <sup>207</sup>Ontario Institute for Cancer Research, Toronto, Ontario, Canada. <sup>208</sup>King Faisal Specialist Hospital and Research Centre, Riyadh, Saudi Arabia. <sup>209</sup>DLR Project Management Agency, Bonn, Germany. <sup>210</sup>Genome Canada, Ottawa, Ontario, Canada. <sup>211</sup>Instituto Carlos Slim de la Salud, Mexico City, Mexico. <sup>212</sup>Federal Ministry of Education and Research, Berlin, Germany. <sup>213</sup>Institut Gustave Roussy, Villejuif, France. <sup>214</sup>Institut National du Cancer (INCA), Boulogne-Billancourt, France. <sup>215</sup>The Wellcome Trust, London, UK. <sup>216</sup>Prostate Cancer Canada, Toronto, Ontario, Canada. <sup>217</sup>National Human Genome Research Institute, National Institutes of Health, Bethesda, MD, USA. <sup>218</sup>Department of Biotechnology, Ministry of Science & Technology, Government of India, New Delhi, Delhi, India. <sup>219</sup>Science Writer, Garrett Park, MD, USA. <sup>220</sup>Cancer Research UK, London, UK. <sup>221</sup>Chinese Cancer Genome Consortium, Shenzhen, China. <sup>222</sup>Laboratory of Molecular Oncology, Key Laboratory of Carcinogenesis and Translational Research (Ministry of Education), Peking University Cancer Hospital & Institute, Beijing, China. <sup>223</sup>Key Laboratory of Carcinogenesis and Translational Research (Ministry of Education), Peking University Cancer Hospital & Institute, Beijing, China. <sup>224</sup>National Cancer Center, Tokyo, Japan. <sup>225</sup>German Cancer Aid, Bonn, Germany. <sup>226</sup>Division of Cancer Genomics, National Cancer Center Research Institute, National Cancer Center, Tokyo, Japan. <sup>227</sup>Laboratory of Molecular Medicine, Human Genome Center, The Institute of Medical Science, The University of Tokyo, Minato-ku, Tokyo, Japan. <sup>228</sup>Japan Agency for Medical Research and Development, Chiyoda-ku, Tokyo, Japan. <sup>229</sup>Medical Oncology, University and Hospital Trust of Verona, Verona, Italy. <sup>230</sup>University of Verona, Verona, Italy. <sup>231</sup>National Cancer Institute, National Institutes of Health, Bethesda, MD, USA. <sup>232</sup>CAPHRI Research School, Maastricht University, Maastricht, The Netherlands. <sup>233</sup>Laboratory for Medical Science Mathematics, RIKEN Center for Integrative Medical Sciences, Yokohama, Japan. <sup>234</sup>University of California San Diego, San Diego, CA, USA. <sup>235</sup>PDXen Biosystems, Seoul, South Korea. <sup>236</sup>Electronics and Telecommunications Research Institute, Daejeon, South Korea. <sup>237</sup>Children's Hospital of Philadelphia, Philadelphia, PA, USA. <sup>238</sup>University of Melbourne Centre for Cancer Research, Melbourne, Victoria, Australia. <sup>239</sup>Syntekabio, Daejeon, South Korea. <sup>240</sup>AbbVie, North Chicago, IL, USA. <sup>241</sup>Genomics Research Program, Ontario Institute for Cancer Research, Toronto, Ontario, Canada. <sup>242</sup>Department of Pediatric Immunology, Hematology and Oncology, University Hospital, Heidelberg, Germany. <sup>243</sup>Heidelberg Institute for Stem Cell Technology and Experimental Medicine (HI-STEM), Heidelberg, Germany. <sup>244</sup>Seven Bridges, Charlestown, MA, USA. <sup>245</sup>Health Sciences Department of Biomedical Informatics, University of California San Diego, La Jolla, CA, USA. <sup>246</sup>Functional and Structural Genomics, German Cancer Research Center (DKFZ), Heidelberg, Germany. <sup>247</sup>Leidos Biomedical Research, McLean, VA, USA. <sup>248</sup>CSRA Incorporated, Fairfax, VA, USA. <sup>249</sup>Department of Internal Medicine, Stanford University, Stanford, CA, USA. <sup>250</sup>Clinical Bioinformatics, Swiss Institute of Bioinformatics, Geneva, Switzerland. <sup>251</sup>Institute for Pathology and Molecular Pathology, University Hospital Zurich, Zurich, Switzerland. <sup>252</sup>Institute of Molecular Life Sciences, University of Zurich, Zurich, Switzerland. <sup>253</sup>MIT Computer Science and Artificial Intelligence Laboratory, Massachusetts Institute of Technology, Cambridge, MA, USA. <sup>254</sup>Institute of Molecular Life Sciences and Swiss Institute of Bioinformatics, University of Zurich, Zurich, Switzerland. <sup>255</sup>Office of Cancer Genomics, National Cancer Institute, National Institutes of Health, Bethesda, MD, USA. <sup>256</sup>Computer Network Information Center, Chinese Academy of Sciences, Beijing, China. <sup>257</sup>Geneplus-Shenzhen, Shenzhen, China. <sup>258</sup>Dana-Farber/Boston Children's Cancer and Blood Disorders Center, Boston, MA, USA. <sup>259</sup>Department of Pediatrics, Harvard Medical School, Boston, MA, USA. <sup>260</sup>Technical University of Denmark, Lyngby, Denmark. <sup>261</sup>University of Copenhagen, Copenhagen, Denmark. <sup>262</sup>Department for BioMedical Research, University of Bern, Bern, Switzerland. <sup>263</sup>Department of Medical Oncology, Inselspital, University Hospital and University of Bern, Bern, Switzerland. <sup>264</sup>Graduate School for Cellular and Biomedical Sciences, University of Bern, Bern, Switzerland. <sup>265</sup>Department of Genitourinary Medical Oncology - Research, Division of Cancer Medicine, The University of Texas MD Anderson Cancer Center, Houston, TX, USA. <sup>266</sup>Department of Urology, Icahn School of Medicine at Mount Sinai, New York, NY, USA. <sup>267</sup>Korea Advanced Institute of Science and Technology, Daejeon, South Korea. <sup>268</sup>Science for Life Laboratory, Department of Cell and Molecular Biology, Uppsala University, Uppsala, Sweden. <sup>269</sup>Queensland Centre for Medical Genomics, Institute for Molecular Bioscience, The University of Queensland, Brisbane, Queensland, Australia. <sup>270</sup>University of Milano Bicocca, Monza, Italy. <sup>271</sup>Sir Peter MacCallum Department of Oncology, Peter MacCallum Cancer Centre, University of Melbourne, Melbourne, Victoria, Australia. <sup>272</sup>Center for Precision Health, School of Biomedical Informatics, The University of Texas Health Science Center, Houston, TX, USA. <sup>273</sup>Health Data Science Unit, University Clinics, Heidelberg, Germany. <sup>274</sup>Department for Biomedical Research, University of Bern, Bern, Switzerland. <sup>275</sup>Research Core Center, National Cancer Centre Korea, Goyang-si, South Korea. <sup>276</sup>Institute of Computer Science, Polish Academy of Sciences, Warsaw, Poland. <sup>277</sup>Harvard University, Cambridge, MA, USA. <sup>278</sup>Memorial Sloan Kettering Cancer Center, New York, NY, USA. <sup>279</sup>Department of Information Technology, Ghent University, Ghent, Belgium. <sup>280</sup>Department of Plant Biotechnology and Bioinformatics, Ghent University, Ghent, Belgium. <sup>281</sup>Yale School of Medicine, Yale University, New Haven, CT, USA. <sup>282</sup>Division of Hematology-Oncology, Samsung Medical Center, Sungkyunkwan University School of Medicine, Seoul, South Korea. <sup>283</sup>Samsung Advanced Institute for Health Sciences and Technology, Sungkyunkwan University School of Medicine, Seoul, South Korea. <sup>284</sup>Cheonan Industry-Academic Collaboration Foundation, Sangmyung University, Cheonan, South Korea. <sup>285</sup>Spanish National Cancer Research Centre, Madrid, Spain. <sup>286</sup>Department of Computer Science, Princeton University, Princeton, NJ, USA. <sup>287</sup>Bern Center for Precision Medicine, University Hospital of Bern, University of Bern, Bern, Switzerland. <sup>288</sup>Englander Institute for Precision Medicine, Weill Cornell Medicine and New York Presbyterian Hospital, New York, NY, USA. <sup>289</sup>Meyer Cancer Center, Weill Cornell Medicine, New York, NY, USA. <sup>290</sup>Pathology and Laboratory, Weill Cornell Medical College, New York, NY, USA. <sup>291</sup>cBio Center, Dana-Farber Cancer Institute, Harvard Medical School, Boston, MA, USA. <sup>292</sup>Department of Cell Biology, Harvard Medical School, Boston, MA, USA. <sup>293</sup>cBio Center, Dana-Farber Cancer Institute, Boston, MA, USA. <sup>294</sup>CREST, Japan Science and Technology Agency, Tokyo, Japan. <sup>295</sup>Department of Medical Science Mathematics, Medical Research Institute, Tokyo Medical and Dental University, Bunkyo-ku, Tokyo, Japan. <sup>296</sup>Laboratory for Medical Science Mathematics, Department of Biological Sciences, Graduate School of Science, The University of Tokyo, Bunkyo-ku, Tokyo, Japan. <sup>297</sup>Science for Life Laboratory, Department of Oncology-Pathology, Karolinska Institutet, Stockholm, Sweden. <sup>298</sup>Department of Gene Technology, Tallinn University of Technology, Tallinn, Estonia. <sup>299</sup>Genetics & Genome Biology Program, SickKids Research Institute, The Hospital for Sick Children, Toronto, Ontario, Canada. <sup>300</sup>Department of Information Technology, Ghent University, Interuniversitair Micro-Electronica Centrum (IMEC), Ghent, Belgium. <sup>301</sup>Science for Life Laboratory, Department of Immunology, Genetics and Pathology, Uppsala University, Uppsala, Sweden. <sup>302</sup>Oregon Health & Sciences University, Portland, OR, USA. <sup>303</sup>Department of Medicine and Therapeutics, The Chinese University of Hong Kong, Shatin, Hong Kong, China. <sup>304</sup>The University of Texas Health Science Center at Houston, Houston, TX, USA. <sup>305</sup>Department of Biomedical Informatics, College of Medicine, The Ohio State University, Columbus, OH, USA. <sup>306</sup>The Ohio State University Comprehensive Cancer Center (OSUCCC - James), Columbus, OH, USA. <sup>307</sup>The University of Texas School of Biomedical Informatics (SBMI) at Houston, Houston, TX, USA. <sup>308</sup>Department of

Biochemistry and Molecular Genetics, Feinberg School of Medicine, Northwestern University, Chicago, IL, USA. <sup>309</sup>Physics Division, Optimization and Systems Biology Lab, Massachusetts General Hospital, Boston, MA, USA. <sup>310</sup>Genome Science Division, Research Center for Advanced Science and Technology, The University of Tokyo, Tokyo, Japan. <sup>311</sup>Bioinformatics Group, Department of Computer Science, University of Leipzig, Leipzig, Germany. <sup>312</sup>Interdisciplinary Center for Bioinformatics, University of Leipzig, Leipzig, Germany. <sup>313</sup>Center for Bioinformatics and Functional Genomics, Cedars-Sinai Medical Center, Los Angeles, CA, USA. <sup>314</sup>Computational Biology, Leibniz Institute on Aging - Fritz Lipmann Institute (FLI), Jena, Germany. <sup>315</sup>Transcriptome Bioinformatics, LIFE Research Center for Civilization Diseases, University of Leipzig, Leipzig, Germany. <sup>316</sup>Center for Epigenetics, Van Andel Research Institute, Grand Rapids, MI, USA. <sup>317</sup>Institut d'Investigacions Biomèdiques August Pi i Sunyer (IDIBAPS), Barcelona, Spain. <sup>318</sup>Research Center for Advanced Science and Technology, The University of Tokyo, Minato-ku, Tokyo, Japan. <sup>319</sup>Van Andel Research Institute, Grand Rapids, MI, USA. <sup>320</sup>Cancer Epigenomics, German Cancer Research Center (DKFZ), Heidelberg, Germany. <sup>321</sup>Department of Biomedical Sciences, Cedars-Sinai Medical Center, Los Angeles, CA, USA. <sup>322</sup>The Hebrew University Faculty of Medicine, Jerusalem, Israel. <sup>323</sup>German Cancer Consortium (DKTK), German Cancer Research Center (DKFZ), Heidelberg, Germany. <sup>324</sup>Department of Pathology, Johns Hopkins University School of Medicine, Baltimore, MD, USA. <sup>325</sup>McKusick-Nathans Institute of Genetic Medicine, Sidney Kimmel Comprehensive Cancer Center, Johns Hopkins University School of Medicine, Baltimore, MD, USA. <sup>326</sup>Foundation Medicine, Cambridge, MA, USA. <sup>327</sup>Department of Biochemistry, Microbiology and Immunology, Faculty of Medicine, University of Ottawa, Ottawa, Ontario, Canada. <sup>328</sup>Cancer Research UK Cambridge Institute, University of Cambridge, Cambridge, UK. <sup>329</sup>University of Cambridge, Cambridge, UK. <sup>330</sup>Brandeis University, Waltham, MA, USA. <sup>331</sup>Hopp Children's Cancer Center (KiTZ), Heidelberg, Germany. <sup>332</sup>Pediatric Glioma Research Group, German Cancer Research Center (DKFZ), Heidelberg, Germany. <sup>333</sup>A. Kharkevich Institute of Information Transmission Problems, Moscow, Russia. <sup>334</sup>Oncology and Immunology, Dmitry Rogachev National Research Center of Pediatric Hematology, Moscow, Russia. <sup>335</sup>Skolkovo Institute of Science and Technology, Moscow, Russia. <sup>336</sup>Center for Medical Innovation, Seoul National University Hospital, Seoul, South Korea. <sup>337</sup>Department of Internal Medicine, Seoul National University Hospital, Seoul, South Korea. <sup>338</sup>Division of Genetics and Genomics, Boston Children's Hospital, Harvard Medical School, Boston, MA, USA. <sup>339</sup>School of Medicine/School of Mathematics and Statistics, University of St Andrews, St Andrews, UK. <sup>340</sup>Department of Genetics and Computational Biology, QIMR Berghofer Medical Research Institute, Brisbane, Queensland, Australia. <sup>341</sup>Institute for Molecular Bioscience, University of Queensland, Brisbane, Queensland, Australia. <sup>342</sup>Cancer Research Institute, Beth Israel Deaconess Medical Center, Boston, MA, USA. <sup>343</sup>Ben May Department for Cancer Research, Department of Human Genetics, The University of Chicago, Chicago, IL, USA. <sup>344</sup>Tri-Institutional PhD Program in Computational Biology and Medicine, Weill Cornell Medicine, New York, NY, USA. <sup>345</sup>Department of Bioengineering, and Department of Cellular and Molecular Medicine, Moores Cancer Center, University of California, San Diego, La Jolla, CA, USA. <sup>346</sup>Centre for Computational Biology, Duke-NUS Medical School, Singapore, Singapore. <sup>347</sup>Department of Computer Science, University of Helsinki, Helsinki, Finland. <sup>348</sup>Institute of Biotechnology, University of Helsinki, Helsinki, Finland. <sup>349</sup>Organismal and Evolutionary Biology Research Programme, University of Helsinki, Helsinki, Finland. <sup>350</sup>Programme in Cancer & Stem Cell Biology, Centre for Computational Biology, Duke-NUS Medical School, Singapore, Singapore. <sup>351</sup>Department of Applied Mathematics and Theoretical Physics, Centre for Mathematical Sciences, University of Cambridge, Cambridge, UK. <sup>352</sup>Department of Statistics, Columbia University, New York, NY, USA. <sup>353</sup>Duke-NUS Medical School, Singapore, Singapore. <sup>354</sup>School of Electronic Information and Communications, Huazhong University of Science and Technology, Wuhan, China. <sup>355</sup>The Kinghorn Cancer Centre, Cancer Division, Garvan Institute of Medical Research, University of New South Wales, Sydney, New South Wales, Australia. <sup>356</sup>MRC Human Genetics Unit, MRC IGMM, University of Edinburgh, Edinburgh, UK. <sup>357</sup>Bioinformatics Group, Division of Molecular Biology, Department of Biology, Faculty of Science, University of Zagreb, Zagreb, Croatia. <sup>358</sup>Department of Bioinformatics, Division of Cancer Genomics, National Cancer Center Research Institute, National Cancer Center, Tokyo, Japan. <sup>359</sup>University of Glasgow, Glasgow, UK. <sup>360</sup>Academic Department of Medical Genetics, University of Cambridge, Addenbrooke's Hospital, Cambridge, UK. <sup>361</sup>MRC Cancer Unit, University of Cambridge, Cambridge, UK. <sup>362</sup>The University of Cambridge School of Clinical Medicine, Cambridge, UK. <sup>363</sup>MRC-University of Glasgow Centre for Virus Research, Glasgow, UK. <sup>364</sup>Wolfson Wohl Cancer Research Centre, Institute of Cancer Sciences, University of Glasgow, Bearsden, UK. <sup>365</sup>School of Computing Science, University of Glasgow, Glasgow, UK. <sup>366</sup>South Western Sydney Clinical School, Faculty of Medicine, University of New South Wales, Liverpool, New South Wales, Australia. <sup>367</sup>West of Scotland Pancreatic Unit, Glasgow Royal Infirmary, Glasgow, UK. <sup>368</sup>University of Melbourne Centre for Cancer Research, Melbourne, Victoria, Australia. <sup>369</sup>Molecular and Medical Genetics, Oregon Health & Science University, Portland, OR, USA. <sup>370</sup>Department of Surgery, University of Melbourne, Parkville, Victoria, Australia. <sup>371</sup>The Murdoch Children's Research Institute, Royal Children's Hospital, Parkville, Victoria, Australia. <sup>372</sup>Walter + Eliza Hall Institute, Parkville, Victoria, Australia. <sup>373</sup>University of Cologne, Cologne, Germany. <sup>374</sup>The Edward S. Rogers Sr Department of Electrical and Computer Engineering, University of Toronto, Toronto, Ontario, Canada. <sup>375</sup>University of Ljubljana, Ljubljana, Slovenia. <sup>376</sup>Department of Public Health Sciences, The University of Chicago, Chicago, IL, USA. <sup>377</sup>Research Institute, NorthShore University HealthSystem, Evanston, IL, USA. <sup>378</sup>Department of Statistics, University of California Santa Cruz, Santa Cruz, CA, USA. <sup>379</sup>Cambridge University Hospitals NHS Foundation Trust, Cambridge, UK. <sup>380</sup>University of Toronto, Toronto, Ontario, Canada. <sup>381</sup>Department of Computer Science, Carleton College, Northfield, MN, USA. <sup>382</sup>Molecular and Medical Genetics, Oregon Health & Science University, Portland, OR, USA. <sup>383</sup>Center for Psychiatric Genetics, NorthShore University HealthSystem, Evanston, IL, USA. <sup>384</sup>Argmix Consulting, North Vancouver, British Columbia, Canada. <sup>385</sup>Department of Biostatistics, The University of Texas MD Anderson Cancer Center, Houston, TX, USA. <sup>386</sup>Department of Biostatistics, University of North Carolina at Chapel Hill, Chapel Hill, NC, USA. <sup>387</sup>The University of Texas MD Anderson Cancer Center, Houston, TX, USA. <sup>388</sup>Molecular and Medical Genetics, Knight Cancer Institute, Oregon Health & Science University, Portland, OR, USA. <sup>389</sup>Department of Health Sciences, Faculty of Medical Sciences, Kyushu University, Fukuoka, Japan. <sup>390</sup>Baylor College of Medicine, Houston, TX, USA. <sup>391</sup>Department of Applied Mathematics and Statistics, Johns Hopkins University, Baltimore, MD, USA. <sup>392</sup>Heinrich Pette Institute, Leibniz Institute for Experimental Virology, Hamburg, Germany. <sup>393</sup>University Medical Center Hamburg-Eppendorf, Bioinformatics Core, Hamburg, Germany. <sup>394</sup>Earlham Institute, Norwich, UK. <sup>395</sup>Norwich Medical School, University of East Anglia, Norwich, UK. <sup>396</sup>The Institute of Cancer Research, London, UK. <sup>397</sup>University of East Anglia, Norwich, UK. <sup>398</sup>German Center for Infection Research (DZIF), Partner Site Hamburg-Borstel-Lübeck-Riems, Hamburg, Germany. <sup>399</sup>Division of Molecular Genetics, German Cancer Research Center (DKFZ), Heidelberg, Germany. <sup>400</sup>Department of Pathology, The University of Texas MD Anderson Cancer Center, Houston, TX, USA. <sup>401</sup>Victorian Institute of Forensic Medicine, Southbank, Victoria, Australia. <sup>402</sup>Peter MacCallum Cancer Centre, University of Melbourne, Melbourne, Victoria, Australia. <sup>403</sup>University of Pennsylvania, Philadelphia, PA, USA. <sup>404</sup>Centre for Cancer Research, The Westmead Institute for Medical Research, Sydney, New South Wales, Australia. <sup>405</sup>Department of Gynaecological Oncology, Westmead Hospital, Sydney, New South Wales, Australia. <sup>406</sup>Genetics and Molecular Pathology, SA Pathology, Adelaide, South Australia, Australia. <sup>407</sup>Centre for Cancer Research, The Westmead Institute for Medical Research, The University of Sydney, Sydney, New South Wales, Australia. <sup>408</sup>Department of Gynaecological Oncology, Westmead Hospital, Sydney, New South Wales, Australia. <sup>409</sup>Garvan Institute of Medical Research, Darlinghurst, New South Wales, Australia. <sup>410</sup>Department of Clinical Pathology, University of Melbourne, Melbourne, Victoria, Australia. <sup>411</sup>Centre for Cancer Research, The Westmead Institute for Medical Research, The University of Sydney, Sydney, New South Wales, Australia. <sup>412</sup>Department of Gynaecological Oncology, Westmead Hospital, Sydney, New South Wales, Australia. <sup>413</sup>Westmead Clinical School, The Westmead Institute for Medical Research, New South Wales, Australia. <sup>414</sup>Department of Surgery, Pancreas Institute, University and Hospital Trust of Verona, Verona, Italy. <sup>415</sup>Department of Surgery, Princess Alexandra Hospital, Brisbane, Queensland, Australia. <sup>416</sup>Surgical Oncology Group, Diamantina Institute, The University of Queensland, Brisbane, Queensland, Australia. <sup>417</sup>Department of Diagnostics and Public Health, University and Hospital Trust of Verona, Verona, Italy. <sup>418</sup>ARC-Net Centre for Applied Research on Cancer, University and Hospital Trust of Verona, Verona, Italy. <sup>419</sup>Illawarra Shoalhaven Local Health District L3 Illawarra Cancer Care Centre, Wollongong Hospital, Wollongong, New South Wales, Australia. <sup>420</sup>Department of Pathology, University of Sydney, Sydney, New South Wales, Australia. <sup>421</sup>School of Biological Sciences, The University of Auckland, Auckland, New Zealand. <sup>422</sup>Department of Pathology and Diagnostics, University and Hospital Trust of Verona, Verona, Italy. <sup>423</sup>Department of Medicine, Section of Endocrinology, University and Hospital Trust of Verona, Verona, Italy. <sup>424</sup>Department of Pathology, Queen Elizabeth University Hospital, Glasgow, UK. <sup>425</sup>Department of Medical Oncology, Beatson West of Scotland Cancer Centre, Glasgow, UK. <sup>426</sup>Academic Unit of Surgery, School of Medicine, College of Medical, Veterinary and Life Sciences, University of Glasgow, Glasgow Royal Infirmary, Glasgow, UK. <sup>427</sup>Tissue Pathology and Diagnostic Oncology, Royal Prince Alfred Hospital, Camperdown, New South Wales, Australia. <sup>428</sup>Discipline of Surgery, Western Sydney University, Penrith, New South Wales, Australia. <sup>429</sup>Institute of Cancer Sciences, College of Medical Veterinary and Life Sciences, University of Glasgow, Glasgow, UK. <sup>430</sup>The Kinghorn Cancer Centre, Cancer Division, Garvan Institute of Medical Research, University of New South Wales, Sydney, New South Wales, Australia. <sup>431</sup>School of Environmental and Life Sciences, Faculty of Science, The University of Newcastle, Ourimbah, New South Wales, Australia. <sup>432</sup>Eastern Clinical School, Monash University, Melbourne, Victoria, Australia. <sup>433</sup>Eppworth HealthCare, Richmond, Victoria, Australia. <sup>434</sup>Olivia Newton-John Cancer Research Institute, La Trobe University, Heidelberg, Victoria, Australia. <sup>435</sup>Melanoma Institute Australia, The University of Sydney, Wollstonecraft, New South Wales, Australia. <sup>436</sup>Children's Hospital at Westmead, The University of Sydney, Sydney, New South Wales, Australia. <sup>437</sup>Melanoma Institute Australia, The University of Sydney, Sydney, New South Wales, Australia. <sup>438</sup>Australian Institute of Tropical Health and Medicine, James Cook University, Douglas, Queensland, Australia. <sup>439</sup>Bioplatforms Australia, North Ryde, New South Wales, Australia. <sup>440</sup>Melanoma Institute Australia, Macquarie University, Wollstonecraft, New South Wales, Australia. <sup>441</sup>Children's Medical Research Institute, Sydney, New South Wales, Australia. <sup>442</sup>Melanoma Institute Australia, The University of Sydney, Wollstonecraft, New South Wales, Australia. <sup>443</sup>Centre for Cancer Research, The Westmead Millennium Institute for Medical Research, University of Sydney, Westmead Hospital, Sydney, New South Wales, Australia. <sup>444</sup>Translational Cancer Research Centre, The University of Sydney at the Westmead Institute, Sydney, New South Wales, Australia. <sup>445</sup>Discipline of Pathology, Sydney Medical School, The University of Sydney, Sydney, New South Wales, Australia. <sup>446</sup>School of Mathematics and Statistics, The University of Sydney, Sydney, New South Wales, Australia. <sup>447</sup>Melanoma Institute Australia, The University of Sydney, Wollstonecraft, New South Wales, Australia. <sup>448</sup>Royal Prince Alfred Hospital, Sydney, New South Wales, Australia. <sup>449</sup>Diagnostic Development, Ontario Institute for Cancer Research, Toronto, Ontario, Canada. <sup>450</sup>Ontario Tumour Bank, Ontario Institute for Cancer Research, Toronto, Ontario, Canada. <sup>451</sup>PanCuRx Translational Research Initiative,



Ontario Institute for Cancer Research, Toronto, Ontario, Canada. <sup>452</sup>BioSpecimen Sciences Program, University Health Network, Toronto, Ontario, Canada. <sup>453</sup>Hepatobiliary/Pancreatic Surgical Oncology Program, University Health Network, Toronto, Ontario, Canada. <sup>454</sup>Lunenfeld-Tanenbaum Research Institute, Mount Sinai Hospital, Toronto, Ontario, Canada. <sup>455</sup>Division of Medical Oncology, Princess Margaret Cancer Centre, Toronto, Ontario, Canada. <sup>456</sup>University of Nebraska Medical Center, Omaha, NE, USA. <sup>457</sup>BioSpecimen Sciences Program, University Health Network, Toronto, Ontario, Canada. <sup>458</sup>Transformative Pathology, Ontario Institute for Cancer Research, Toronto, Ontario, Canada. <sup>459</sup>University Health Network, Princess Margaret Cancer Centre, Toronto, Ontario, Canada. <sup>460</sup>Department of Health Sciences Research, Mayo Clinic, Rochester, MN, USA. <sup>461</sup>BioSpecimen Sciences, Laboratory Medicine (Toronto), Medical Biophysics, PanCuRX, Toronto, Ontario, Canada. <sup>462</sup>Department of Laboratory Medicine and Pathobiology, University of Toronto, Toronto, Ontario, Canada. <sup>463</sup>Department of Pathology, Human Oncology and Pathogenesis Program, Memorial Sloan Kettering Cancer Center, New York, NY, USA. <sup>464</sup>Department of Medical Biophysics, University of Toronto, Toronto, Ontario, Canada. <sup>465</sup>Department of Biochemistry and Molecular Medicine, University California at Davis, Sacramento, CA, USA. <sup>466</sup>Human Longevity, San Diego, CA, USA. <sup>467</sup>Department of Surgical Oncology, Princess Margaret Cancer Centre, Toronto, Ontario, Canada. <sup>468</sup>Genome Informatics Program, Ontario Institute for Cancer Research, Toronto, Ontario, Canada. <sup>469</sup>STARR Innovation Facility, Princess Margaret Cancer Centre, Toronto, Ontario, Canada. <sup>470</sup>Department of Pathology, Toronto General Hospital, Toronto, Ontario, Canada. <sup>471</sup>CRUK Manchester Institute and Centre, Manchester, UK. <sup>472</sup>Department of Radiation Oncology, University of Toronto, Toronto, Ontario, Canada. <sup>473</sup>Manchester Cancer Research Centre, Cancer Division, FBMH, University of Manchester, Manchester, UK. <sup>474</sup>Radiation Medicine Program, Princess Margaret Cancer Centre, Toronto, Ontario, Canada. <sup>475</sup>Hefei University of Technology, Anhui, China. <sup>476</sup>State Key Laboratory of Cancer Biology and Xijing Hospital of Digestive Diseases, Fourth Military Medical University, Shaanxi, China. <sup>477</sup>Fourth Military Medical University, Shaanxi, China. <sup>478</sup>Laboratory of Molecular Oncology, Key Laboratory of Carcinogenesis and Translational Research (Ministry of Education), Peking University Cancer Hospital & Institute, Beijing, China. <sup>479</sup>Department of Surgery, Ruijin Hospital, Shanghai Jiaotong University School of Medicine, Shanghai, China. <sup>480</sup>Leeds Institute of Medical Research, University of Leeds, St James's University Hospital, Leeds, UK. <sup>481</sup>Canadian Center for Computational Genomics, McGill University, Montreal, Quebec, Canada. <sup>482</sup>Department of Human Genetics, McGill University, Montreal, Quebec, Canada. <sup>483</sup>International Agency for Research on Cancer, Lyon, France. <sup>484</sup>McGill University and Genome Quebec Innovation Centre, Montreal, Quebec, Canada. <sup>485</sup>St James Institute of Oncology, University of Leeds, St James's University Hospital, Leeds, UK. <sup>486</sup>Institute of Mathematics and Computer Science, University of Latvia, Riga, Latvia. <sup>487</sup>Centre National de Génotypage, CEA - Institut de Génétique, Evry, France. <sup>488</sup>Department of Oncology, Gil Medical Center, Gachon University, Incheon, South Korea. <sup>489</sup>Department of Molecular Oncology, BC Cancer Agency, Vancouver, British Columbia, Canada. <sup>490</sup>Los Alamos National Laboratory, Los Alamos, NM, USA. <sup>491</sup>Department of Genetics, Institute for Cancer Research, Oslo University Hospital, The Norwegian Radium Hospital, Oslo, Norway. <sup>492</sup>Lund University, Lund, Sweden. <sup>493</sup>Translational Research Lab, Centre Léon Bérard, Lyon, France. <sup>494</sup>Department of Molecular Biology, Faculty of Science, Radboud Institute for Molecular Life Sciences, Radboud University, Nijmegen, The Netherlands. <sup>495</sup>Department of Pathology, Brigham and Women's Hospital, Harvard Medical School, Boston, MA, USA. <sup>496</sup>Department of Molecular Pathology, The Netherlands Cancer Institute, Amsterdam, The Netherlands. <sup>497</sup>Li Ka Shing Centre, Cancer Research UK Cambridge Institute, University of Cambridge, Cambridge, UK. <sup>498</sup>Department of Oncology, University of Cambridge, Cambridge, UK. <sup>499</sup>Breast Cancer Translational Research Laboratory J. C. Heuson, Institut Jules Bordet, Brussels, Belgium. <sup>500</sup>Laboratory for Translational Breast Cancer Research, Department of Oncology, KU Leuven, Leuven, Belgium. <sup>501</sup>Translational Cancer Research Unit, GZA Hospitals St-Augustinus, Center for Oncological Research, Faculty of Medicine and Health Sciences, University of Antwerp, Antwerp, Belgium. <sup>502</sup>Department of Gynecology & Obstetrics and Department of Clinical Sciences, Skåne University Hospital, Lund University, Lund, Sweden. <sup>503</sup>Icelandic Cancer Registry, Icelandic Cancer Society, Reykjavik, Iceland. <sup>504</sup>Department of Medical Oncology, Josephine Neffkens Institute and Cancer Genomics Centre, Erasmus Medical Center, Rotterdam, The Netherlands. <sup>505</sup>National Genotyping Center, Institute of Biomedical Sciences, Academia Sinica, Taipei, Taiwan. <sup>506</sup>Department of Pathology, Oslo University Hospital Ullevål, Oslo, Norway. <sup>507</sup>Faculty of Medicine and Institute of Clinical Medicine, University of Oslo, Oslo, Norway. <sup>508</sup>Department of Pathology, Memorial Sloan Kettering Cancer Center, New York, NY, USA. <sup>509</sup>Department of Pathology, Skåne University Hospital, Lund University, Lund, Sweden. <sup>510</sup>Department of Pathology, Academic Medical Center, Amsterdam, The Netherlands. <sup>511</sup>Department of Pathology, College of Medicine, Hanyang University, Seoul, South Korea. <sup>512</sup>Department of Pathology, Asan Medical Center, College of Medicine, Ulsan University, Songpa-gu, Seoul, South Korea. <sup>513</sup>The Netherlands Cancer Institute, Amsterdam, The Netherlands. <sup>514</sup>Department of Surgery, Dana-Farber Cancer Institute, Brigham and Women's Hospital, Boston, MA, USA. <sup>515</sup>Department of Surgery, Memorial Sloan Kettering Cancer Center, New York, NY, USA. <sup>516</sup>Department of Clinical Science, University of Bergen, Bergen, Norway. <sup>517</sup>Morgan Welch Inflammatory Breast Cancer Research Program and Clinic, The University of Texas MD Anderson Cancer Center, Houston, TX, USA. <sup>518</sup>The University of Queensland Centre for Clinical Research, The Royal Brisbane & Women's Hospital, Herston, Queensland, Australia. <sup>519</sup>Department of Pathology, Institut Jules Bordet, Brussels, Belgium. <sup>520</sup>Institute for Bioengineering and Biopharmaceutical Research (IBBR), Hanyang University, Seoul, South Korea. <sup>521</sup>University of Oslo, Oslo, Norway. <sup>522</sup>Institut Bergonié, Bordeaux, France. <sup>523</sup>Department of Research Oncology, Guy's Hospital, King's Health Partners AHSC, King's College London School of Medicine, London, UK. <sup>524</sup>University Hospital of Minjoo, INSERM UMR 1098, Besançon, France. <sup>525</sup>Cambridge Breast Unit, Addenbrooke's Hospital, Cambridge University Hospital NHS Foundation Trust and NIHR Cambridge Biomedical Research Centre, Cambridge, UK. <sup>526</sup>East of Scotland Breast Service, Ninewells Hospital, Aberdeen, UK. <sup>527</sup>Oncologie Sénologie, ICM Institut Régional du Cancer, Montpellier, France. <sup>528</sup>Department of Radiation Oncology, Radboud University Nijmegen Medical Centre, Nijmegen, The Netherlands. <sup>529</sup>University of Iceland, Reykjavik, Iceland. <sup>530</sup>Dundee Cancer Centre, Ninewells Hospital, Dundee, UK. <sup>531</sup>Institut Curie, INSERM Unit 830, Paris, France. <sup>532</sup>Department of Laboratory Medicine, Radboud University Nijmegen Medical Centre, Nijmegen, The Netherlands. <sup>533</sup>Department of General Surgery, Singapore General Hospital, Singapore. <sup>534</sup>INCa-Synergie, Centre Léon Bérard, Université Lyon, Lyon, France. <sup>535</sup>Giovanni Paolo II/I.R.C.C.S. Cancer Institute, Bari, Italy. <sup>536</sup>Department of Biopathology, Centre Léon Bérard, Lyon, France. <sup>537</sup>Université Claude Bernard Lyon 1, Villeurbanne, France. <sup>538</sup>NCCS-VARI Translational Research Laboratory, National Cancer Centre Singapore, Singapore. <sup>539</sup>Department of Pathology, Erasmus Medical Center Rotterdam, Rotterdam, The Netherlands. <sup>540</sup>Division of Molecular Carcinogenesis, The Netherlands Cancer Institute, Amsterdam, The Netherlands. <sup>541</sup>Institute of Human Genetics, Christian-Albrechts-University, Kiel, Germany. <sup>542</sup>Institute of Human Genetics, University of Ulm, Ulm, Germany. <sup>543</sup>University Hospital of Ulm, Ulm, Germany. <sup>544</sup>Hematopathology Section, Institute of Pathology, Christian-Albrechts-University, Kiel, Germany. <sup>545</sup>Department of Human Genetics, Hannover Medical School, Hannover, Germany. <sup>546</sup>Department of Pediatric Oncology, Hematology and Clinical Immunology, Heinrich-Heine-University, Düsseldorf, Germany. <sup>547</sup>Department of Internal Medicine/Hematology, Friedrich-Ebert-Hospital, Neumünster, Germany. <sup>548</sup>Pediatric Hematology and Oncology, University Hospital Muenster, Muenster, Germany. <sup>549</sup>Department of Pediatrics, University Hospital Schleswig-Holstein, Kiel, Germany. <sup>550</sup>Department of Medicine II, University of Würzburg, Würzburg, Germany. <sup>551</sup>Senckenberg Institute of Pathology, University of Frankfurt Medical School, Frankfurt, Germany. <sup>552</sup>Institute of Pathology, Charité-University Medicine Berlin, Berlin, Germany. <sup>553</sup>Department for Internal Medicine II, University Hospital Schleswig-Holstein, Kiel, Germany. <sup>554</sup>Institute for Medical Informatics Statistics and Epidemiology, University of Leipzig, Leipzig, Germany. <sup>555</sup>Department of Hematology and Oncology, Georg-Augusts-University of Göttingen, Göttingen, Germany. <sup>556</sup>Institute of Cell Biology (Cancer Research), University of Duisburg-Essen, Essen, Germany. <sup>557</sup>MVZ Department of Oncology, PraxisClinic am Johannisplatz, Leipzig, Germany. <sup>558</sup>Institute of Pathology, Ulm University and University Hospital of Ulm, Ulm, Germany. <sup>559</sup>Department of Pathology, Robert-Bosch-Hospital, Stuttgart, Germany. <sup>560</sup>Pediatric Hematology and Oncology, University Hospital Giessen, Giessen, Germany. <sup>561</sup>Institute of Clinical Molecular Biology, Christian-Albrechts-University, Kiel, Germany. <sup>562</sup>Institute of Pathology, University of Wuerzburg, Wuerzburg, Germany. <sup>563</sup>Department of General Internal Medicine, University Kiel, Kiel, Germany. <sup>564</sup>Clinic for Hematology and Oncology, St-Antonius-Hospital, Eschweiler, Germany. <sup>565</sup>Department for Internal Medicine III, University of Ulm and University Hospital of Ulm, Ulm, Germany. <sup>566</sup>Neuroblastoma Genomics, German Cancer Research Center (DKFZ), Heidelberg, Germany. <sup>567</sup>Department of Pediatric Oncology and Hematology, University of Cologne, Cologne, Germany. <sup>568</sup>University of Düsseldorf, Düsseldorf, Germany. <sup>569</sup>Department of Vertebrate Genomics/Otto Warburg Laboratory Gene Regulation and Systems Biology of Cancer, Max Planck Institute for Molecular Genetics, Berlin, Germany. <sup>570</sup>St Jude Children's Research Hospital, Memphis, TN, USA. <sup>571</sup>Heidelberg University Hospital, Heidelberg, Germany. <sup>572</sup>Genomics and Proteomics Core Facility High Throughput Sequencing Unit, German Cancer Research Center (DKFZ), Heidelberg, Germany. <sup>573</sup>Epigenomics and Cancer Risk Factors, German Cancer Research Center (DKFZ), Heidelberg, Germany. <sup>574</sup>University Medical Center Hamburg-Eppendorf, Hamburg, Germany. <sup>575</sup>Martini-Clinic, Prostate Cancer Center, University Medical Center Hamburg-Eppendorf, Hamburg, Germany. <sup>576</sup>Institute of Pathology, University Medical Center Hamburg-Eppendorf, Hamburg, Germany. <sup>577</sup>Division of Cancer Genome Research, German Cancer Research Center (DKFZ), Heidelberg, Germany. <sup>578</sup>National Institute of Biomedical Genomics, Kalyani, India. <sup>579</sup>Advanced Centre for Treatment Research & Education in Cancer, Tata Memorial Centre, Navi Mumbai, India. <sup>580</sup>Department of Pathology, General Hospital of Treviso, Department of Medicine, University of Padua, Treviso, Italy. <sup>581</sup>Department of Medicine (DIMED), Surgical Pathology Unit, University of Padua, Padua, Italy. <sup>582</sup>Department of Hepatobiliary and Pancreatic Oncology, Hepatobiliary and Pancreatic Surgery Division, Division of Pathology and Clinical Laboratories, National Cancer Center Hospital, Chuo-ku, Tokyo, Japan. <sup>583</sup>Department of Pathology, Keio University School of Medicine, Tokyo, Japan. <sup>584</sup>Department of Hepatobiliary and Pancreatic Oncology, National Cancer Center Hospital, Tokyo, Japan. <sup>585</sup>Department of Pathology, Graduate School of Medicine, The University of Tokyo, Bunkyo-ku, Tokyo, Japan. <sup>586</sup>Preventive Medicine, Graduate School of Medicine, The University of Tokyo, Tokyo, Japan. <sup>587</sup>Gastric Surgery Division, Division of Pathology and Clinical Laboratories, National Cancer Center Hospital, Tokyo, Japan. <sup>588</sup>Department of Gastroenterology and Hepatology, Yokohama City University Graduate School of Medicine, Kanagawa, Japan. <sup>589</sup>Laboratory of Molecular Medicine, Human Genome Center, The Institute of Medical Science, University of Tokyo, Tokyo, Japan. <sup>590</sup>Department of Cancer Genome Informatics, Graduate School of Medicine, Osaka University, Osaka, Japan. <sup>591</sup>Hiroshima University, Hiroshima, Japan. <sup>592</sup>Tokyo Women's Medical University, Tokyo, Japan. <sup>593</sup>Osaka International Cancer Center, Osaka, Japan. <sup>594</sup>Wakayama Medical University, Wakayama, Japan. <sup>595</sup>Hokkaido University, Sapporo, Japan. <sup>596</sup>Division of Medical Oncology, National Cancer Centre, Singapore. <sup>597</sup>Cholangiocarcinoma Screening and Care Program and Liver Fluke and Cholangiocarcinoma Research Centre, Faculty of Medicine, Khon Kaen University, Khon Kaen, Thailand. <sup>598</sup>Lymphoma Genomic Translational Research Laboratory, National Cancer

Centre, Singapore, Singapore. <sup>599</sup>Center of Digestive Diseases and Liver Transplantation, Fundeni Clinical Institute, Bucharest, Romania. <sup>600</sup>Division of Hepatobiliary and Pancreatic Surgery, Department of Surgery, School of Medicine, Keimyung University Dongsan Medical Center, Daegu, South Korea. <sup>601</sup>Pathology, Hospital Clinic, Institut d'Investigacions Biomèdiques August Pi i Sunyer (IDIBAPS), University of Barcelona, Barcelona, Spain. <sup>602</sup>Hematology, Hospital Clinic, Institut d'Investigacions Biomèdiques August Pi i Sunyer (IDIBAPS), University of Barcelona, Barcelona, Spain. <sup>603</sup>Department of Biochemistry and Molecular Biology, Faculty of Medicine, University Institute of Oncology-IUOPA, Oviedo, Spain. <sup>604</sup>Anatomia Patològica, Hospital Clinic, Institut d'Investigacions Biomèdiques August Pi i Sunyer (IDIBAPS), University of Barcelona, Barcelona, Spain. <sup>605</sup>Spanish Ministry of Science and Innovation, Madrid, Spain. <sup>606</sup>Royal National Orthopaedic Hospital (Bolsover), London, UK. <sup>607</sup>Department of Pathology, Oslo University Hospital, The Norwegian Radium Hospital, Oslo, Norway. <sup>608</sup>Institute of Clinical Medicine and Institute of Oral Biology, University of Oslo, Oslo, Norway. <sup>609</sup>Research Department of Pathology, University College London Cancer Institute, London, UK. <sup>610</sup>East Anglian Medical Genetics Service, Cambridge University Hospitals NHS Foundation Trust, Cambridge, UK. <sup>611</sup>Royal National Orthopaedic Hospital (Stanmore), London, UK. <sup>612</sup>Division of Orthopaedic Surgery, Oslo University Hospital, Oslo, Norway. <sup>613</sup>Department of Pathology (Research), University College London Cancer Institute, London, UK. <sup>614</sup>Radcliffe Department of Medicine, University of Oxford, Oxford, UK. <sup>615</sup>University of Pavia, Pavia, Italy. <sup>616</sup>Karolinska Institute, Stockholm, Sweden. <sup>617</sup>Wellcome Sanger Institute, Hinxton, UK. <sup>618</sup>University of Oxford, Oxford, UK. <sup>619</sup>Salford Royal NHS Foundation Trust, Salford, UK. <sup>620</sup>Gloucester Royal Hospital, Gloucester, UK. <sup>621</sup>Royal Stoke University Hospital, Stoke-on-Trent, UK. <sup>622</sup>St Thomas's Hospital, London, UK. <sup>623</sup>Imperial College NHS Trust, Imperial College London, London, UK. <sup>624</sup>Department of Histopathology, Salford Royal NHS Foundation Trust, Salford, UK. <sup>625</sup>Faculty of Biology, Medicine and Health, The University of Manchester, Manchester, UK. <sup>626</sup>Edinburgh Royal Infirmary, Edinburgh, UK. <sup>627</sup>Barking Havering and Redbridge University Hospitals NHS Trust, Romford, UK. <sup>628</sup>King's College London and Guy's and St Thomas' NHS Foundation Trust, London, UK. <sup>629</sup>Cambridge Oesophago-gastric Centre, Cambridge University Hospitals NHS Foundation Trust, Cambridge, UK. <sup>630</sup>Nottingham University Hospitals NHS Trust, Nottingham, UK. <sup>631</sup>St Luke's Cancer Centre, Royal Surrey County Hospital NHS Foundation Trust, Guildford, UK. <sup>632</sup>University of North Carolina at Chapel Hill, Chapel Hill, NC, USA. <sup>633</sup>Norfolk and Norwich University Hospital NHS Trust, Norwich, UK. <sup>634</sup>University Hospitals Coventry and Warwickshire NHS Trust, Coventry, UK. <sup>635</sup>University Hospitals Birmingham NHS Foundation Trust, Birmingham, UK. <sup>636</sup>Centre for Cancer Research and Cell Biology, Queen's University, Belfast, UK. <sup>637</sup>School of Cancer Sciences, Faculty of Medicine, University of Southampton, Southampton, UK. <sup>638</sup>Wythenshawe Hospital, Manchester, UK. <sup>639</sup>Barts Cancer Institute, Barts and the London School of Medicine and Dentistry, Queen Mary University of London, London, UK. <sup>640</sup>Royal Marsden NHS Foundation Trust, London and Sutton, London, UK. <sup>641</sup>University Hospital Southampton NHS Foundation Trust, Southampton, UK. <sup>642</sup>HCA Laboratories, London, UK. <sup>643</sup>University of Liverpool, Liverpool, UK. <sup>644</sup>Academic Urology Group, Department of Surgery, University of Cambridge, Cambridge, UK. <sup>645</sup>University of Oxford, Oxford, Oxford, UK. <sup>646</sup>Department of Urology, James Buchanan Brady Urological Institute, Johns Hopkins University School of Medicine, Baltimore, MD, USA. <sup>647</sup>Second Military Medical University, Shanghai, China. <sup>648</sup>Department of Surgery and Cancer, Imperial College London, London, UK. <sup>649</sup>The Chinese University of Hong Kong, Shatin, Hong Kong, China. <sup>650</sup>Nuffield Department of Surgical Sciences, John Radcliffe Hospital, University of Oxford, Headington, Oxford, UK. <sup>651</sup>Department of Histopathology, Cambridge University Hospitals NHS Foundation Trust, Cambridge, UK. <sup>652</sup>Department of Bioinformatics and Computational Biology and Department of Systems Biology, The University of Texas MD Anderson Cancer Center, Houston, TX, USA. <sup>653</sup>Laboratory of Pathology, Center for Cancer Research, National Cancer Institute, Bethesda, MD, USA. <sup>654</sup>Canada's Michael Smith Genome Sciences Center, BC Cancer Agency, Vancouver, British Columbia, Canada. <sup>655</sup>Center for Molecular Oncology, Memorial Sloan Kettering Cancer Center, New York, NY, USA. <sup>656</sup>University Health Network, Toronto, Ontario, Canada. <sup>657</sup>Department of Pathology and Laboratory Medicine, School of Medicine, University of North Carolina at Chapel Hill, Chapel Hill, NC, USA. <sup>658</sup>Department of Population and Quantitative Health Sciences, Case Western Reserve University School of Medicine, Cleveland, OH, USA. <sup>659</sup>Research Health Analytics and Informatics, University Hospitals Cleveland Medical Center, Cleveland, OH, USA. <sup>660</sup>Arnie Charbonneau Cancer Institute, University of Calgary, Calgary, Alberta, Canada. <sup>661</sup>Department of Surgery and Department of Oncology, University of Calgary, Calgary, Alberta, Canada. <sup>662</sup>Buck Institute for Research on Aging, Novato, CA, USA. <sup>663</sup>Duke University Medical Center, Durham, NC, USA. <sup>664</sup>USC Norris Comprehensive Cancer Center, University of Southern California, Los Angeles, CA, USA. <sup>665</sup>The Preston Robert Tisch Brain Tumor Center, Duke University Medical Center, Durham, NC, USA. <sup>666</sup>Department of Dermatology and Department of Pathology, Yale University, New Haven, CT, USA. <sup>667</sup>Fox Chase Cancer Center, Philadelphia, PA, USA. <sup>668</sup>Department of Surgery, Division of Thoracic Surgery, The Johns Hopkins University School of Medicine, Baltimore, MD, USA. <sup>669</sup>University of Michigan Comprehensive Cancer Center, Ann Arbor, MI, USA. <sup>670</sup>University of Alabama at Birmingham, Birmingham, AL, USA. <sup>671</sup>Division of Anatomic Pathology, Mayo Clinic, Rochester, MN, USA. <sup>672</sup>Division of Experimental Pathology, Mayo Clinic, Rochester, MN, USA. <sup>673</sup>Department of Oncology, The Johns Hopkins School of Medicine, The Sidney Kimmel Comprehensive Cancer Center at Johns Hopkins University, Baltimore, MD, USA. <sup>674</sup>International Genomics Consortium, Phoenix, AZ, USA. <sup>675</sup>Department of Pediatrics and Department of Genetics, University of North Carolina at Chapel Hill, Chapel Hill, NC, USA. <sup>676</sup>Department of Pathology, UPMC Shadyside, Pittsburgh, PA, USA. <sup>677</sup>Center for Cancer Genomics, National Cancer Institute, National Institutes of Health, Bethesda, MD, USA. <sup>678</sup>Department of Neuro-Oncology, Istituto Neurologico Besta, Milan, Italy. <sup>679</sup>University of Queensland Thoracic Research Centre, The Prince Charles Hospital, Brisbane, Queensland, Australia. <sup>680</sup>Department of Neurosurgery, University of Florida, Gainesville, FL, USA. <sup>681</sup>Center for Biomedical Informatics, Harvard Medical School, Boston, MA, USA. <sup>682</sup>Department of Cancer Biology, The University of Texas MD Anderson Cancer Center, Houston, TX, USA. <sup>683</sup>Department of Surgical Oncology, The University of Texas MD Anderson Cancer Center, Houston, TX, USA. <sup>684</sup>Division of Gastroenterology and Hepatology, Mayo Clinic, Rochester, MN, USA. <sup>685</sup>Sylvester Comprehensive Cancer Center, University of Miami, Miami, FL, USA. <sup>686</sup>Department of Internal Medicine, Division of Medical Oncology, Lineberger Comprehensive Cancer Center, University of North Carolina at Chapel Hill, Chapel Hill, NC, USA. <sup>687</sup>University of Tennessee Health Science Center for Cancer Research, Memphis, TN, USA. <sup>688</sup>Centre for Translational and Applied Genomics, British Columbia Cancer Agency, Vancouver, British Columbia, Canada. <sup>689</sup>Department of Pathology & Immunology, Baylor College of Medicine, Houston, TX, USA. <sup>690</sup>Michael E. DeBakey Veterans Affairs Medical Center, Houston, TX, USA. <sup>691</sup>Carolina Center for Genome Sciences, University of North Carolina at Chapel Hill, Chapel Hill, NC, USA. <sup>692</sup>Canada's Michael Smith Genome Sciences Centre, BC Cancer Agency, Vancouver, British Columbia, Canada. <sup>693</sup>Indivumed, Hamburg, Germany. <sup>694</sup>Division of Hepatobiliary and Pancreatic Surgery, Department of Surgery, School of Medicine, Keimyung University Dong-san Medical Center, Daegu, South Korea. <sup>695</sup>Women's Cancer Program at the Samuel Oschin Comprehensive Cancer Institute, Cedars-Sinai Medical Center, Los Angeles, CA, USA. <sup>696</sup>Department of Surgery, School of Medicine and Health Science, The George Washington University, Washington, DC, USA. <sup>697</sup>Endocrine Oncology Branch, Center for Cancer Research, National Cancer Institute, National Institutes of Health, Bethesda, MD, USA. <sup>698</sup>National Cancer Center, Gyeonggi, South Korea. <sup>699</sup>ILSbio, LLC Biobank, Chestertown, MD, USA. <sup>700</sup>Gynecologic Oncology, NYU Laura and Isaac Perlmutter Cancer Center, New York University, New York, NY, USA. <sup>701</sup>Division of Oncology, Stem Cell Biology Section, Washington University School of Medicine, St Louis, MO, USA. <sup>702</sup>Urologic Oncology Branch, Center for Cancer Research, National Cancer Institute, National Institutes of Health, Bethesda, MD, USA. <sup>703</sup>Institute for Systems Biology, Seattle, WA, USA. <sup>704</sup>Center for Personalized Medicine, Department of Pathology and Laboratory Medicine, Children's Hospital Los Angeles, Los Angeles, CA, USA. <sup>705</sup>Institute for Genomic Medicine, Nationwide Children's Hospital, Columbus, OH, USA. <sup>706</sup>Department of Surgery, Duke University, Durham, NC, USA. <sup>707</sup>Department of Obstetrics, Gynecology and Reproductive Services, University of California San Francisco, San Francisco, CA, USA. <sup>708</sup>Department of Neurology and Department of Neurosurgery, Henry Ford Hospital, Detroit, MI, USA. <sup>709</sup>Knight Cancer Institute, Oregon Health & Science University, Portland, OR, USA. <sup>710</sup>Department of Pathology, Roswell Park Cancer Institute, Buffalo, NY, USA. <sup>711</sup>Department of Obstetrics and Gynecology, Division of Gynecologic Oncology, Washington University School of Medicine, St Louis, MO, USA. <sup>712</sup>Department of Palliative, Rehabilitation and Integrative Medicine, The University of Texas MD Anderson Cancer Center, Houston, TX, USA. <sup>713</sup>Penrose St Francis Health Services, Colorado Springs, CO, USA. <sup>714</sup>The University of Chicago, Chicago, IL, USA. <sup>715</sup>Department of Neurology, Mayo Clinic, Rochester, MN, USA. <sup>716</sup>Center for Liver Cancer, Research Institute and Hospital, National Cancer Center, Gyeonggi, South Korea. <sup>717</sup>Department of Genetics and Lineberger Comprehensive Cancer Center, University of North Carolina at Chapel Hill, Chapel Hill, NC, USA. <sup>718</sup>NYU Langone Medical Center, New York, NY, USA. <sup>719</sup>Department of Hematology and Medical Oncology, Cleveland Clinic, Cleveland, OH, USA. <sup>720</sup>Department of Genetics, Department of Pathology and Laboratory Medicine, School of Medicine, University of North Carolina at Chapel Hill, Chapel Hill, NC, USA. <sup>721</sup>Helen F. Graham Cancer Center at Christiana Care Health Systems, Newark, DE, USA. <sup>722</sup>Cureline, South San Francisco, CA, USA. <sup>723</sup>Department of Obstetrics and Gynecology, Medical College of Wisconsin, Milwaukee, WI, USA. <sup>724</sup>Hematology and Medical Oncology, Winship Cancer Institute of Emory University, Atlanta, GA, USA. <sup>725</sup>Vanderbilt Ingram Cancer Center, Vanderbilt University, Nashville, TN, USA. <sup>726</sup>Ohio State University College of Medicine and Arthur G. James Comprehensive Cancer Center, Columbus, OH, USA. <sup>727</sup>Research Computing Center, University of North Carolina at Chapel Hill, Chapel Hill, NC, USA. <sup>728</sup>Analytical Biological Services, Wilmington, DE, USA. <sup>729</sup>Department of Dermatology, University Hospital Essen, Westdeutsches Tumorzentrum and German Cancer Consortium, Essen, Germany. <sup>730</sup>University of Pittsburgh, Pittsburgh, PA, USA. <sup>731</sup>Murtha Cancer Center, Walter Reed National Military Medical Center, Bethesda, MD, USA. <sup>732</sup>Brigham and Women's Hospital, Harvard Medical School, Boston, MA, USA. <sup>733</sup>Department of Surgery, Memorial Sloan Kettering Cancer Center, New York, NY, USA. <sup>734</sup>Department of Gynecologic Oncology and Reproductive Medicine, and Center for RNA Interference and Non-Coding RNA, The University of Texas MD Anderson Cancer Center, Houston, TX, USA. <sup>735</sup>Department of Urology, Mayo Clinic, Rochester, MN, USA. <sup>736</sup>Department of Surgery, Johns Hopkins University School of Medicine, Baltimore, MD, USA. <sup>737</sup>Department of Neurosurgery, Department of Hematology and Department of Medical Oncology, Winship Cancer Institute and School of Medicine, Emory University, Atlanta, GA, USA. <sup>738</sup>Georgia Regents University Cancer Center, Augusta, GA, USA. <sup>739</sup>Thoracic Oncology Laboratory, Mayo Clinic, Rochester, MN, USA. <sup>740</sup>Institute for Genomic Medicine, Nationwide Children's Hospital, Columbus, OH, USA. <sup>741</sup>Department of Obstetrics & Gynecology, Division of Gynecologic Oncology, Mayo Clinic, Rochester, MN, USA. <sup>742</sup>International Institute for Molecular Oncology, Poznań, Poland. <sup>743</sup>Poznan University of Medical Sciences, Poznań, Poland. <sup>744</sup>Edison Family Center for Genome Sciences and Systems Biology, Washington University, St Louis, MO, USA. <sup>745</sup>These authors jointly supervised this work: Peter J. Campbell, Gad Getz, Jan O. Korbel, Joshua M. Stuart, Lincoln D. Stein. \*e-mail: pc8@sanger.ac.uk; gadgetz@broadinstitute.org; korbel@embl.de; jstuart@ucsc.edu; lincoln.stein@gmail.com
